# Supplementary material
Source: PubMed Central journal article supplement (PMC4238964)
Supplement: NIHMS627422-supplement-2.pdf [file NIHMS627422-supplement-2.pdf]

# DNA Brick Crystals with Prescribed Depth

## Supporting Online Material II - Sequences

### Contents

|                                                                         |           |
|-------------------------------------------------------------------------|-----------|
| <b>S1 Sequences of one-dimensional DNA-bundle crystals (Z-crystals)</b> | <b>2</b>  |
| S1.1 Z-6H×6H×32B-cuboid crystal sequences                               | 2         |
| S1.2 Z-8H×8H×32B-cuboid crystal sequences                               | 3         |
| S1.3 Z-10H×10H×32B-cuboid crystal sequences                             | 5         |
| S1.4 Z-6H×6H×128B-spiral crystal sequences                              | 8         |
| S1.5 Z-43H×32B-triangle crystal sequences                               | 12        |
| S1.6 Z-44H×32B-hexagon crystal sequences                                | 14        |
| S1.7 Z-56H×32B-tunnel crystal sequences                                 | 16        |
| S1.8 Z-60H×64B-tunnel crystal sequences                                 | 18        |
| S1.9 Z-108H×32B-tunnel crystal sequences                                | 21        |
| <b>S2 Sequences of one-dimensional X-crystals</b>                       | <b>24</b> |
| S2.1 X-6H×6H×64B-cuboid crystal sequences                               | 24        |
| S2.2 X-32H×64B-pore crystal sequences                                   | 27        |
| <b>S3 Two-dimensional DNA-multilayer crystals (ZX-crystals)</b>         | <b>30</b> |
| S3.1 ZX-4H×4H×32B-cuboid crystal sequences                              | 30        |
| S3.2 ZX-4H×6H×32B-cuboid crystal sequences                              | 31        |
| S3.3 ZX-4H×10H×32B-cuboid crystal sequences                             | 32        |
| S3.4 ZX-4H×20H×32B-cuboid crystal sequences                             | 34        |
| S3.5 ZX-32H×64B-channel crystal sequences                               | 37        |
| S3.6 ZX-32H×64B-cross-channel crystal sequences                         | 39        |
| S3.7 ZX-6H×6H×64B-pore crystal sequences                                | 41        |
| S3.8 ZX-96H×64B-cross-tunnel crystal sequences                          | 43        |
| S3.9 ZX-4H×6H×96B-channel crystal sequences                             | 49        |
| <b>S4 Two-dimensional DNA-forest crystals (XY-crystals)</b>             | <b>51</b> |
| S4.1 XY-48H×64B-pore crystal sequences                                  | 51        |
| S4.2 XY-64H×64B-pore crystal sequences                                  | 55        |
| S4.3 XY-4H×4H×32B-tube crystal sequences                                | 59        |
| S4.4 XY-4H×4H×32B-cuboid crystal using alternating DNA-bricks sequences | 60        |
| S4.5 XY-4H×4H×64B-cuboid crystal sequences                              | 61        |
| S4.6 XY-4H×4H×128B-cuboid crystal sequences                             | 63        |
| S4.7 XY-4H×4H×192B-cuboid crystal sequences                             | 66        |
| S4.8 XY-4H×4H×256B-cuboid crystal sequences                             | 69        |
| S4.9 XY-32H×64B-pore crystal sequences                                  | 73        |
| S4.10 XY-32H×128B-pore crystal sequences                                | 76        |
| S4.11 XY-8H×4H×96B-channel crystal sequences                            | 80        |
| <b>S5 Offset Two-dimensional crystals</b>                               | <b>83</b> |
| S5.1 Offset-ZX-6H×6H×64B-cuboid crystal sequence                        | 83        |

**Note: all sequences are marked by their 5' ends corresponding to the design diagrams.**

S1.1 Z-6H×6H×32B-cuboid crystal sequences

|                                                   |       |
|---------------------------------------------------|-------|
| CCAGGTTAAGTGGCTCAATCATACTCACGGTAACTGTTGTGTCCTAT   | 1,23  |
| GTTTACTTAGGGATGGTACGAACTCAACGCAC                  | 1,39  |
| GCTCGGGTAGTCTCAAGAAAGATAGAGAGCATA                 | 3,23  |
| AATTCGCTAAACCGGAAAAAGTATCCGCATCTC                 | 3,39  |
| ACTCAGTGATCGAGTATTCATGTGCGCTTTTCGAACGGTGACACACTT  | 5,39  |
| GTGTTCAATTCAGAGTAGCGGAAATATGGCCGC                 | 7,23  |
| TTCGGTGCAGCGGGCCGCCTGTAACGCTTAATCAGCCCCGGGCTTTT   | 7,39  |
| GCTAATACGCTGAGCGATGCTGTTGTTGCGGG                  | 9,23  |
| GTTTCTGAACCGGAACCCGGGCTAATGAAGCC                  | 9,39  |
| GTGACCCAGAGACTGTCTGATGCACCGGGAGCCAGCCACTTAGCTGT   | 11,23 |
| GTCAGTGTGATCGCGAGTTCCCTCTAGCTAGGGTGATGCCAAAAGGGT  | 13,23 |
| GGATATGGAGCTGGAACGGCTCTGATTTCTAG                  | 13,39 |
| TGACCTGGTATAATGGCGGAGCTACCTGACCT                  | 15,23 |
| CAATCATACTGCCACGGAAGGATTCATCCCC                   | 15,39 |
| TTTAAAGATGATCGCACAGTCTTTGAGATGTTGAACATCTTTTGGTTG  | 17,39 |
| GCGTAAAGATCTCGCATTCTGGTGCCAAAACCT                 | 19,23 |
| GCCGACTCGTTCAAGCACTATATCTGGCTATAAAAGATGTCTGTGAG   | 19,39 |
| CCCAAGCTTAGCATAAGCGGCTGGACGACCCC                  | 21,23 |
| GCCGTGCGACGACTGACCGTCTGAGCCCTGCGC                 | 21,39 |
| GACAAACGCATATCTCGGCCGCCAAATTAATAGTCGATTACGCTTC    | 23,23 |
| GCCTAAAGGTCTTCCACGGTAATCGGGGGTGACTCCGGCCTCTTGG    | 25,23 |
| TATATTAGCTTACCCACTCGCGTGGCACGTCT                  | 25,39 |
| ACGACTCGTCGAACGAGGACTGTTCTACATAG                  | 27,23 |
| TGACTTGGACGAGGTTTACTGGGCGCTATAAC                  | 27,39 |
| AGGAAACTCGAGGGGCTCCCTGTCTGTGAGCCAGCGACCCTTCTG     | 29,39 |
| GAGAAAGATGCGGTGGCAGTAGTTGTGATTAG                  | 31,23 |
| CTTGGGGGTGATATACTCACTAAACTCCTTCTAATGTGACTAAGCGT   | 31,39 |
| TAACTCCAAAGGAAACCCAGCTATCCCATATTC                 | 33,23 |
| GATGTAAGCGGACATCTATGCGCCCGATATCC                  | 33,39 |
| GTTCAAACCTAGGGGGCTTCTGACCAAAGCTCATGAGAATTGTAAACAG | 35,23 |
| GTATGATTATAGGACACAACAGTTAACCGTGAGGGGTACCTCCCGGT   | 0,15  |
| CTATCTTCGTGCGTTGAGTTCGTATATGCTCTGTATTAGCGTTCCGGT  | 2,15  |
| CACCGTTCGAGATGCGGATACTTAAAGTGTGATGAACACCCCGTGC    | 4,15  |
| GGGCTGATTAAGCGTTCACTGAGTGAAAAGGCGACATGAATACTCGAT  | 6,15  |
| ACAGGCGGAAAAGCCAAAGACTGTGCGATCA                   | 6,31  |
| ATTTCCGCGGCTTCATAGCGAATTTTGAGACTACCCGAGCTCCGGTTT  | 8,15  |
| TAGCCCGGGCGGCCATCCAGGTACGTGGGACG                  | 8,31  |
| AACAGCATAACAGCTAAAAGTAAACGAGCCACTTAACTGGCCATCCCT  | 10,15 |
| GTGGCTGGCCCGCAACACACTGACTTCCAGCT                  | 10,31 |
| GAGGGAACACCCTTTTGCATCAGACAGTCTCT                  | 12,15 |
| GGCATCACCTAGCTACGTTTGTCTTAAATTTG                  | 12,31 |
| TAGTCCGCTAGAAATTCAGAAACCGCTCAGC                   | 14,15 |
| CAGAGCCGAGGTCAGGAGCTTGGGTGAGTCGT                  | 14,31 |
| AGATGTTGCGGGATGAGCACCGAATACTCTGA                  | 16,15 |
| ATCCTTCCCAACCAAACCTTACGCGCTTGAAC                  | 16,31 |
| CATCTTTTATAGCCAGTTCTTAAAAACATCTC                  | 18,15 |
| ATAATAGTCTGACAGAGACAGGGAGCCCTCG                   | 18,31 |
| CACCAGAAGCGCAGGGTATGATTGCCATTATA                  | 20,15 |
| CTCGACGGAGTTTTGGCGAGTCGTAACCTCGT                  | 20,31 |
| CCAGCCGGAAGCGTACCATATCCTCGCGATC                   | 22,15 |
| ATCGACTAGGGGTGCTCTTTAGGCTGGGTAAG                  | 22,31 |
| ATTACCGTCCAAGGAGGCGGGCCGAGGATATG                  | 24,15 |
| GCCGGAGTACCCCGGTTTGAACGAGCTTTGGTCAGAAAGCCCCCTA    | 24,31 |
| AACAGTCCAGACGTGCCGACCGGCTTATGCTA                  | 26,15 |
| CACGCGAGCTATGTAGTGGAGTTAGATGTCCGCTTACATCGTTTCCTT  | 26,31 |
| GTCGCTGGGTATAGCGGAGTCGGCTGCGAGAT                  | 28,15 |
| CCCAGTGACAGAAGTGTCTTTCTCGTATATCACCCCAAGCCACCGCA   | 28,31 |
| TTAGTGAGACGCTTAGTCACATTAGAAGGAGTAGTTTCTGCTCGACA   | 30,31 |
| GGCGATACTAATCACAACCTACTGGGATATCGCCAAGTCATCGTTCTGA | 32,31 |
| AATTCTCAGAATATGGGATAGCTGCTGTTACCTAATATAGGAAGGAC   | 34,31 |

S1.2 Z-8H×8H×32B-cuboid crystal sequences

|                                                   |       |
|---------------------------------------------------|-------|
| CCAGGTTAAGTGGCTCAATCATACTCACGGTAACTGTTGTGCTCTAT   | 1,23  |
| GTTTACTTAGGGATGGTACGAACTCAACGCAC                  | 1,39  |
| GCTCGGGTAGTCTCAAGAAGATAGAGAGCATA                  | 3,23  |
| AATTCGCTAAACCGGAAAAAGTATCCGCATCTC                 | 3,39  |
| ACTCAGTGATCGAGTATTCATGTCGCCTTTTC                  | 5,23  |
| GAACGGTGACACACTTGTGTTTCATTCAGAGTA                 | 5,39  |
| GCGGAAATATGGCCGCTTCGGTGCGCAGCGGGCCGCCTGTAACGCTTA  | 7,39  |
| ATCAGCCCGGGCTTTTGCTAATACGCTGAGCG                  | 9,23  |
| ATGCTGTTGTTGCGGGGTTTCTGAACCGGAACCCGGGCTAATGAAGCC  | 9,39  |
| GTGACCCAGAGACTGTCTGATGCACCGGGAG                   | 11,23 |
| CCAGCCACTTAGCTGTGTGTCAGTGTGATCGCGA                | 11,39 |
| GTTCCCTCTAGCTAGGGTGATGCCAAAAGGGT                  | 13,23 |
| GGATATGGAGCTGGAACGGCTCTGATTTCTAG                  | 13,39 |
| TGACCTGGTATAATGGCGGAGCTACCTGACCTCAATCATAACGTCCAC  | 15,23 |
| GGAAGGATTCATCCCTTTAAGAATGATCGCACAGTCTTTGAGATGTT   | 17,23 |
| GAACATCTTTTGGTTGGCGTAAAGATCTCGCA                  | 17,39 |
| TTCTGGTGCCAAAAGTCCGACTCGTTCAAGC                   | 19,23 |
| ACTATTATCTGGCTATAAAAGATGCTGTGTCAG                 | 19,39 |
| CCCAAGCTTAGCATAAGCGGGCTGGACGACCCC                 | 21,23 |
| GCCGTGCGACGACTGACCGTCGAGCCCTGCGC                  | 21,39 |
| GACAAACGCATATCCTCGGCCCGCAAATTAATAGTCGATTACGCTTC   | 23,39 |
| GCCTAAAGGTCCTTCCACGGTAATCGGGGGTG                  | 25,23 |
| ACTCCGGCTCCTTGGTATATTAGCTTACCCACTCGCGTGGCACGTCT   | 25,39 |
| ACGACTCGTCAACGAGGACTGTTCTACATAG                   | 27,23 |
| TGACTTGGACGAGGTTTCACTGGGCGCTATAC                  | 27,39 |
| AGGAAACTCGAGGGGCTCCCTGTCTGTGAGC                   | 29,23 |
| CCAGCGACCACTTCTGGAGAAAGATGCGGTGG                  | 29,39 |
| CAGTAGTTGTGATTAGCTTGGGGGTGATATACCTCACTAAACTCCTTC  | 31,23 |
| TAATGTGACTAAGCGTTAACTCCAAGGAAACCAGCTATCCCATATTC   | 33,23 |
| GATGTAAGCGGACATCTATGCGCCCGATATCC                  | 33,39 |
| GTTCAAAGTAGGGGGCTTCTGACCAAAGCTCA                  | 35,23 |
| TGAGAATTGTAAACAGGAACAGCTTAGAGCAG                  | 35,39 |
| TCAAGTTCGGATACGCTACCTATGGACGGGGA                  | 37,23 |
| TATGCGACACCATGATCCGGATGAGTTATGAA                  | 37,39 |
| GATCGTCATTGGGATATACAATCTCGAAGTAAAGCATAGCACCTGCG   | 39,39 |
| AAGATAGGGTCACAGCAGTAATACCTCTACCT                  | 41,23 |
| TGTTGGACGTAAGCGTGAAATAACGACCAGAAAGCACGAGGATTATCA  | 41,39 |
| CGTGTACCTCGAAATAATCGTTAGTTTCTCGA                  | 43,23 |
| CTGTTCCGAAACAGGCAGCGGTAGCCTCCAC                   | 43,39 |
| TTAACCTATGCCTTGGTAACTGATTTTCTCCT                  | 45,23 |
| GGTTCGCTAGCTGATCTATGGTCCTTAATAT                   | 45,39 |
| AACCTCGGAGGCAAGGGGAGAGGGTGAAAACAGGCCACCTGGCTCGGG  | 47,23 |
| GAGTGCCCTCGGCAGCCGCTCGGTTATACTCGTCAAGCCTGCTTT     | 49,23 |
| CCATAGCTAACCAGATTGTGATTCACGTGA                    | 49,39 |
| GTCGTAATAAGCAAACGTGGGAGTGCCCGA                    | 51,23 |
| GCGTCTGAGGTATGGTTACCCACTATGTTGT                   | 51,39 |
| CTCAAGTGCTAACAGTACTAATTATCCATAAC                  | 53,23 |
| TGTGCAGTCAGGGATTCTCACCGGTGGCCGT                   | 53,39 |
| TGCTACATCAGTTTCTTTCACCTCGGGGAAACTATACTTACGCACT    | 55,39 |
| GGTTTGGAGGGATTAGGCAATTGCTAGGTTGC                  | 57,23 |
| ATTGTAGGCACAATTTTGATTGATCAGATACATAGGGCAATAAAGCT   | 57,39 |
| GTAGCCTGAGGGCGCAGCTGCACCGTGTAC                    | 59,23 |
| CTTGATATTGAGGGACACCTCGTCATTTCGAT                  | 59,39 |
| AAACCATACTGAGGGCAGTGGGCGAGATCGGC                  | 61,23 |
| TAATCATTAGTGCTCCCTTAGTTAGTTCATAG                  | 61,39 |
| TTCATTAGGGGCGGAAATGGGCTGGTGCCCCACGTACAGTAACCAACC  | 63,23 |
| GTATGATTATAGGACACAACAGTTAACCGTGACCAGGTCAAGGTCAGG  | 0,15  |
| CTATCTTCGTGCGTTGAGTTCGTATATGCTCTGAGGGAACCTCCAGCT  | 2,15  |
| GACATGAAGAGATGCGGATACTTTGAAAAGGCGGGTACACAGCTAA    | 4,15  |
| ACAGGCGTACTCTGAATGAACACTAAGCGTTGGGCTGATCCCGCAAC   | 6,15  |
| TAGCCCGGGTTCGGTATTTCGCCCCGCTGCGCACCGAAGCGGGCCAT   | 8,15  |
| TCAGAAACGGCTTCATGCGGGCCGAGGATATG                  | 8,31  |
| GTATTAGCTCGCGATCCACCGTTTCTACTCGATCACTGAGTAAGTGTGT | 10,15 |
| ACACTGACCGCTCAGCAGCTTGGGTCAGTCGT                  | 10,31 |
| GCATCAGACTAGAAATAGCGAATTTGAGACTACCCGAGCTCCGGTTT   | 12,15 |
| CAGAGCCGCTCCCGGTCACCAGAAATAGCCAG                  | 12,31 |

|                                                   |       |
|---------------------------------------------------|-------|
| GGCATCACGTGGGACGAAGTAAACGAGCCACTTAACCTGGCCATCCCT  | 14,15 |
| TATGATTGACCCTTTTATCCTTCCCAACCAA                   | 14,31 |
| TTCTTAAAAACATCTCTAGCTCCGCCATTATA                  | 16,15 |
| AAAGACTGTGCGATCAAACACTGGTATATCA                   | 16,31 |
| GAGTCGGCTGCGAGATCCATATCCCCTAGCTA                  | 18,15 |
| CTTACGCGCTTGAACAGTTTCCTCAGAAGTG                   | 18,31 |
| CCAGCCGCTGACAGAGTGGCTGGCAGTCTCT                   | 20,15 |
| CATCTTTTGGGGTCGTGAGTCGTAACCTCGT                   | 20,31 |
| ATCGACTAGCGCAGGGAACAGCATAAAAGCCC                  | 22,15 |
| CTCGACGGGAAGCGTACTTTAGGCCCAAGGAG                  | 22,31 |
| CACGCGAGTGGGTAAGCGTTTGTCTAATTTG                   | 24,15 |
| CTAATATAAGACGTGCAGATTGTATATCCAA                   | 24,31 |
| ATTACCGTGTATAGCGCGCACGGCTTATGCTA                  | 26,15 |
| CCCAGTGACACCCCGGAACTTGAATCATGGT                   | 26,31 |
| AACAGTCCCCACCGCAATAATAGTAGTTTTGG                  | 28,15 |
| TCTTTCTCCTATGTAGGTTTGAACCTGTTTAC                  | 28,31 |
| GACAGGGAGAAGGAGTAGATGTTTCGGGGATGA                 | 30,15 |
| TTAGTGAGGCTCGACATCACATTAGATGTCCG                  | 30,31 |
| TGGAGTTAGAATATGGCCCCAAGCTAATCAC                   | 32,15 |
| GATAGCTGGTTTCCTTCGAGGGTTTGTTCAC                   | 32,31 |
| GGTCAGAAAGGATATCGGTCGCTGGGCCCTCG                  | 34,15 |
| GGCGCATATGAGCTTTTAGGTTAAATCAGCTA                  | 34,31 |
| CATAGGTAAGTCTTACCAAGTCATCGTTTGA                   | 36,15 |
| AGCTGTTCTCCCGTCGGTACACGGCCTGTTT                   | 36,31 |
| GCTATGCTTTCATAACGCCGAGTGGAAGGAC                   | 38,15 |
| TCATCCGGCGCAGGGTCTATCTTACGCTTAC                   | 38,31 |
| CTCGTGCTTTCGGTCTGACGATCTTACTTCG                   | 40,15 |
| GTTATTTCTGATAATCGAGTGCAAAGAACTG                   | 40,31 |
| GTATTACTGTGGGAGGGTCGCATAGCGTATCC                  | 42,15 |
| CTACCGCTAGGTAGAGCACTTGAGATCCCTGA                  | 42,31 |
| CTAACGATATATTAAGAATTCTCAGCCCCCTA                  | 44,15 |
| GACCATAGTCGAGAAAAGTACGACACCATACC                  | 44,31 |
| ATCAGTTACCCGAGCCCTTACATCACGCTTAG                  | 46,15 |
| AGGTGGCCAGGAGAAAGGGCACTATCGGGTT                   | 46,31 |
| GAGGCGGCAAAGCAGGCCTCTCCCCTTGCCCTC                 | 48,15 |
| CTTGACGAGTATAACCCTAATGAATGGGGCACCAGCCCATTTCGCC    | 48,31 |
| TCCCACGTTACGTGGGCGGAACCCCAAGGCA                   | 50,15 |
| AATGCACATCGGGCACTATGGTTTGGAGCACTAATGATTAGCCCTCAG  | 50,31 |
| TAATTAGTACAACATACGGAACAGTATTTCGA                  | 52,15 |
| GTGGGTAAGTTATGGACAGGCTACGTCCCTCAATATCAAGGCGCGCT   | 52,31 |
| AGTATAGTACGGCCACGTCCAACAGCTGTGAC                  | 54,15 |
| CGGTGAGAAAGTGCATATCCAAACCAAATTGTGCCTACAATCTAATCCC | 54,31 |
| CGAATCAAAGCTTTATTGCCCATGTATGTGATATGTAGCATTCCCAG   | 56,31 |
| GACGAGGTGCAACCTAGCAATTGCATCCGAATCGTGCAAACTGTAG    | 58,31 |
| TAACATAAGGTGACACGGTGCAGCTCTATGAACTCAGACGCTTGCTTTA | 60,31 |
| ACTGTACGGCCGATCTCGCCCACTGGTTGGTTAGCTATGGTGCCGAGG  | 62,31 |

### S1.3 Z-10H×10H×32B-cuboid crystal sequences

|                                                    |       |
|----------------------------------------------------|-------|
| CCAGGTAAAGTGGCTCAATCATACTCACGGTAACTGTTGTGTCCTAT    | 1,23  |
| GTTTACTTAGGGATGGTACGAACTCAACGCAC                   | 1,39  |
| GCTCGGTAGTCTCAAGAAGATAGAGAGCATA                    | 3,23  |
| AATTCGCTAAACCGGAAAAAGTATCCGCATCTC                  | 3,39  |
| ACTCAGTGATCGAGTATTCATGTCGCCTTTTC                   | 5,23  |
| GAACGGTGACACACTTGTGTTTCATTCAGAGTA                  | 5,39  |
| GCGGAAATATGGCCGCTTCGGTGCAGCGGG                     | 7,23  |
| CCGCCTGTAACGCTTAATCAGCCCGGGCTTTT                   | 7,39  |
| GCTAATACGCTGAGCGATGCTGTTGTTGCGGGGTTTCTGAACCGGAAC   | 9,39  |
| CCGGGCTAATGAAGCCGTGACCCCAGAGACTG                   | 11,23 |
| TCTGATGCACCGGGAGCCAGCCACTTAGCTGTGTCAGTGTGATCGCGA   | 11,39 |
| GTTCCCTCTAGCTAGGGTGATGCCAAAAGGGT                   | 13,23 |
| GGATATGGAGCTGGAACGGCTCTGATTTCTAG                   | 13,39 |
| TGACCTGGTATAATGGCGGAGCTACCTGACCT                   | 15,23 |
| CAATCATACGTCCCACGGAAGGATTCATCCCC                   | 15,39 |
| TTAAGAATGATCGCACAGTCTTTGAGATGTT                    | 17,23 |
| GAACATCTTTTGGTTGGCGTAAAGATCTCGCA                   | 17,39 |
| TTCTGGTGCCAAAAGTCCGACTCGTTCAAGCACTATTATCTGGCTAT    | 19,23 |
| AAAAGATGTCTGTCAGCCAAAGCTTAGCATAAGCGGCTGGACGACCCC   | 21,23 |
| GCCGTGCGACGACTGACCGTCGAGCCCTGCGC                   | 21,39 |
| GACAAACGCATATCCTCGGCCGCCAAATTA                     | 23,23 |
| TAGTCGATTACGCTTCGCCTAAAGGTCCTTCC                   | 23,39 |
| ACGGTAATCGGGGGTGACTCCGGCCTCCTTGG                   | 25,23 |
| TATATTAGCTTACCCACTCGCGTGGCAGTCT                    | 25,39 |
| ACGACTCGTCGAACGAGGACTGTTCTACATAG                   | 27,23 |
| TGACTTGGACGAGGTTTCACTGGGCGTATAC                    | 27,39 |
| AGGAAACTCGAGGGCTCCCTGTCTGTGCGAGCCAGCGACCACTTCTG    | 29,39 |
| GAGAAAGATGCGGTGGCAGTAGTTGTGATTAG                   | 31,23 |
| CTTGGGGGTGATATACCTCACTAAACTCCTTCTAATGTGACTAAGCGT   | 31,39 |
| TAACTCCAAAGGAAACCAGCTATCCCATATTC                   | 33,23 |
| GATGTAAGCGGACATCTATGCGCCCGATATCC                   | 33,39 |
| GTTCAAAGTAGGGGGCTTCTGACCAAAGCTCA                   | 35,23 |
| TGAGAATTGTAACAGGAACAGCTTAGAGCAG                    | 35,39 |
| TCAAGTTCGGATACGCTACCTATGGACGGGGA                   | 37,23 |
| TATGCGACACCATGATCCGGATGAGTTATGAA                   | 37,39 |
| GATCGTCATTGGGATATAACAATCTCGAAGTAAAGCATAGCACCCCTGCG | 39,23 |
| AAGATAGGGTCACAGCAGTAATACCTCTACCTTGTGGACGTAAGCGT    | 41,23 |
| GAAATAACGACCAGAAAGCACGAGGATTATCA                   | 41,39 |
| CGTGTACCTCGAAATAATCGTTAGTTTCTCGA                   | 43,23 |
| CTGTTCCGAAACAGGCAGCGGTAGCCTCCAC                    | 43,39 |
| TTAACCTATGCCTTGGTAACTGATTTCTCCT                    | 45,23 |
| GGTCCGCTAGCTGATCTATGGTCCTTAATAT                    | 45,39 |
| AACCCTCGGAGGCAAGGGGAGAGGGTGAAACA                   | 47,23 |
| GGCCACCTGGCTCGGGGAGTGCCCCCTCGGCA                   | 47,39 |
| GCCGCTCGGTTATACCTCGTCAAGCCTGCTTCCATAGCTAACCCGAT    | 49,39 |
| TGTGCATTCCACGTGAGTCGTACTTAAAGCAA                   | 51,23 |
| ACGTGGGAGTGCCCGAGCGTCTGAGGTATGGTTTACCCACTATGTTGT   | 51,39 |
| CTCAAAGTGCTAACAGTACTAATATCCATAAC                   | 53,23 |
| TGTGCACGTACGGGATTCTCACCAGTGGCCGT                   | 53,39 |
| TGCTACATCAGTTTCTTTCGACTCCTGGGGAA                   | 55,23 |
| ACTATACTTACGCACTGGTTTGGAGGGATTAG                   | 55,39 |
| GCAATTGCTAGGTTGCATTGTAGGCACAATTT                   | 57,23 |
| TTGATTGATCACAATATGCGCAATAAAGCT                     | 57,39 |
| GTAGCCTGAGGCGCGCAGCTGCACCGTGTACCTTGATATTGAGGGAC    | 59,23 |
| ACCTCGTCATTTCGGATAAACCTACTGAGGGCAGTGGGCGAGATCGGC   | 61,23 |
| TAATCATTAGTGCTCCCTTAGTTAGTTTCATAG                  | 61,39 |
| TTCATTAGGGGCGAAATGGGCTGGTGCCCA                     | 63,23 |
| CGTACAGTAACCAACCGGTGTACCTGTGGGTA                   | 63,39 |
| GGGCCGAGCGTGGGCTTACATGTGCAAGTGA                    | 65,23 |
| AATATATGACTTGGTCGACCCAGATCTGCTAGA                  | 65,39 |
| AACCACCAACATCCTCCTTGACACCTTTCAAT                   | 67,23 |
| TTTAGTAAACACCCAACAGAGCTGAACTTCC                    | 67,39 |
| CATGGTCTGTTACTGTCTATGATCATAGGATCAAACTAAATACAGC     | 69,39 |
| GTACCGCCAGTTCTGTCTTATTGGCGATCG                     | 71,23 |
| TGCATTCCAATGTTTGTGATGGCCGCTGGCTTATTAAGACGGCCGGTGT  | 71,39 |
| AACCACATAAAGTCGTCCGCCTCCGGTAGTCA                   | 73,23 |

|                                                   |       |
|---------------------------------------------------|-------|
| ACGCGGAACGTAATGGCAGAAAGTCTATACCC                  | 73,39 |
| GACAAAAACAGATTTGTACCGGGGTGAACAGC                  | 75,23 |
| ACGTGCGGCTTCTCCTGTATCGCCTTGTGTAT                  | 75,39 |
| TATACTTTGCGGGGGGTCGAGCGCTCCACT                    | 77,23 |
| GTAGTGGCCGGCCATCGTGGACTAGAAAGCGC                  | 77,39 |
| CGGCAATCTGAATATCGCTACCTCCGATACGCGAACCAGAACCATTTA  | 79,23 |
| AGAGTAGGGGACAGTGCTCAGCCAAACAGTGGGACATCTCGGAAAGGTG | 81,23 |
| TCCCAAGTGCAAGTAAAAAAGGAATTATGAGA                  | 81,39 |
| TCATGTGGGATCCTAAAGTTTCTGGTAGACCT                  | 83,23 |
| CGTAGGCTAGAGCGGTGATATCCACGGTACAT                  | 83,39 |
| TCGTTTACTGACGGAACGAGAGTGCTGGCAT                   | 85,23 |
| AAGCAAGAGAAACCTAACTTGGGGACTAAGAT                  | 85,39 |
| CGTTGCGAATTTTCGCGCGATTTCGCATGTAGC                 | 87,23 |
| CGAACGAGATCGTCTTAGACGACGGATCTCCT                  | 87,39 |
| GCATGCCGGTAGCACCGTCAAATATGCGTGCTTTAACGCTTTAGACC   | 89,39 |
| CAGCTTGACGCAAGACGCTAATCACTGGGCAG                  | 91,23 |
| GGTCCTAGGTTGCAGAAACCTACCCCTAAGCAGCGTAGTAAGGGTTA   | 91,39 |
| CAAGTTCTGCGGCGGCTGTACGAATGAGTCC                   | 93,23 |
| GGCCTTGACATGACATTCTCCACCCGTCCAA                   | 93,39 |
| CACCAGCAGGATGTCGAGCCACAACCTTGACA                  | 95,23 |
| GTAGTACAGTATCTTTTTTCATGGCGGCGATG                  | 95,39 |
| TCGCCGTTTGCTCGCGTGCGTACGGCTTTTAT                  | 97,23 |
| ATAGCGTAGACCGGACAACCCCGTAAATCGTA                  | 97,39 |
| AGAGTCGTTATGCCCCCGGTTCTGCTAGAGTGGGACTGGATCAGATG   | 99,23 |
| GTATGATTATAGGACACAACAGTTAACCGTGACACCAGAAGCTTGAAC  | 0,15  |
| CTATCTTCGTGCGTTGAGTTCGTATATGCTCTTTCTTAAACAACAAA   | 2,15  |
| GACATGAAGAGATGCGGATACTTTGAAAAGGCCAGGTCAAGTGGGACG  | 4,15  |
| GCACCGAATACTCTGAATGAACACCCCGCTGCGAGGGAACCTCCAGCT  | 6,15  |
| TCAGAAACAAAAGCCCGGCTGATGTTCCGGTTAGCCCGCTCCCGGT    | 8,15  |
| ACACTGACACAGCTAAGTATTAGCCCCGCAACAACAGCATCGCTCAGC  | 10,15 |
| GTGGCTGGTTCGCGATCGACAGGGAGCCCTCG                  | 10,31 |
| GGGGTACCTAGAAAATACAGGCGGGCGGCCATATTCCGCTAAGCGTT   | 12,15 |
| CAGAGCCGAGTCTCTCGAGTCGTAACCTCGT                   | 12,31 |
| GGCATCACGGGGATGACACCGTTCTACTCGATCACTGAGTAAGTGTG   | 14,15 |
| ATCCTTCCACCCTTTTATTACCGTTGGGTAAG                  | 14,31 |
| TAGTCCGTGCGAGATAGCGAATTTGAGACTACCCGAGCTCCGGTTT    | 16,15 |
| CTTTACGCAGGTACGGCGTTTGTGGAAGCGTA                  | 16,31 |
| AAAGACTGATAGCCAGAAGTAAACGAGCCACTTAACTGGCCATCCCT   | 18,15 |
| ATAATAGTAAACATCTCCATCTTTTTCAGTCGT                 | 18,31 |
| AGCTTGGGGGGTTCGTGAGTCGGCAGTTTTGG                  | 20,15 |
| CCAGCCGTTATGCTATGACGATCTTACTTCG                   | 20,31 |
| GCGGGCCGGCGCAGGGAGATGTTCTGCGATCA                  | 22,15 |
| CTCGACGGTTAATTTGGAACCTGAATCATGGT                  | 22,31 |
| GCCGGAGTGAAGGACTATGATTGCCATTATA                   | 24,15 |
| CTTTAGGCCCAAGGAGTTTGAACCTGTTTAC                   | 24,31 |
| AACAGTCCAGACGTGCCATATCCCTAGCTA                    | 26,15 |
| CACGCGAGCTATGTAGTGGAGTTAGATGTCCG                  | 26,31 |
| GTCGCTGGGTATAGCGGCATCAGAGCTTCAT                   | 28,15 |
| CCCAGTGACAGAAGTGTCTTTCTCGTATATCA                  | 28,31 |
| TCACATTAGAAGGAGTAGTTTCTGCTCGACA                   | 30,15 |
| TTAGTGAGACGCTTAGCTTGACGAGTATAACC                  | 30,31 |
| AACTACTGGGATATCGCCAAGTCATCGTTTCGA                 | 32,15 |
| GGCGATACTAATCACCAGGGGTTCCTCCGAGCC                 | 32,31 |
| GATAGCTGCTGCTCTACTAATATACACCCCG                   | 34,15 |
| AGCTGTTTGAATATGGTAGGTTAAATCAGCTA                  | 34,31 |
| GGTCAGAATTCATAACATCGACTAAGGATATG                  | 36,15 |
| TCATCCGGTGAGCTTTGGTACACGGCCTGTTT                  | 36,31 |
| CATAGGTACGCAGGGTCGCACGGCCTGACAGA                  | 38,15 |
| GCTATGCTTCCCGTCCCTATCTTTTCTGGTC                   | 38,31 |
| GTATTACTACGCTTACAGATTGTATATCCAA                   | 40,15 |
| GTCCAACAAGGTAGAGCAGGCTACGTGACACG                  | 40,31 |
| CTAACGATTGATAATCGTCGCATAGCGTATCC                  | 42,15 |
| CTCGTGCTTCGAGAAAGCAATGTATGTGAT                    | 42,31 |
| ATCAGTTAGTGGGAGGAATTCAGCCCCCTA                    | 44,15 |
| CTACCCTAGGAGAAAATGTAGCAAGTGCCTA                   | 44,31 |
| CCTCTCCCATATTAAGCTTACATCGTTTCCTT                  | 46,15 |
| GACCATAGTGTTCACCACTGAGATCCCTGA                    | 46,31 |
| AGCTATGGTGCCGAGGCCCAAGCCACCGCA                    | 48,15 |

|                                                   |       |
|---------------------------------------------------|-------|
| GGGACTCATCGGGTTAATGCACATCGGGCAC                   | 48,31 |
| GTGGGTAAACCATAACCGAGGGCGCAAAGCAGG                 | 50,15 |
| TCAGACGCACAACATATCATAACGACAGTAGAA                 | 50,31 |
| AGTACGACACGGCCACAGGTGGCCCTTGCCCTC                 | 52,15 |
| CGGTGAGATTGCTTTATGGTGGTTTGGGTGTT                  | 52,31 |
| TAATTAGTCTAATCCCGCGGAACCCCAAGGCA                  | 54,15 |
| TCCAAACCGTTATGGACTCGGCCGACCAAGT                   | 54,31 |
| GAGTGCAAAGCTTTATCGGAACAGTATTTCGA                  | 56,15 |
| TGCCCATGTTCCCCAGCTAATGAAGGTTGGTT                  | 56,31 |
| CCTACAATGTCCCTCAGTTATTTGCTGTGAC                   | 58,15 |
| ATATCAAGAAATGTGGACGAGGTGGAGCACT                   | 58,31 |
| TATGGTTTGGCGATCTGTGCAGCTGCGCGCCT                  | 60,15 |
| CGCCCACTGCCCTCAGGATTGCCGGCGTATCG                  | 60,31 |
| CAGCCCATCTATGAACCGAATCAAGCAACCTA                  | 62,15 |
| TAAC TAAGTGGGGCACAGAGTATAGATGGCCG                 | 62,31 |
| ACATGTAATACCCACAAGTATAGTAGAAACTG                  | 64,15 |
| GGTACACCTCACTTGCTTTTTGTGAGGAGAAG                  | 64,31 |
| GTGTCAAGTCTAGCAGCGTGCACAACGTTAG                   | 66,15 |
| ATCTGGTCATTGAAAGATGTGGTTCCATTACG                  | 66,31 |
| TAGTTTGAGGAAGTTCTCCCACGTTACAGTGG                  | 68,15 |
| AGCTCTGTGCTGTATTGGCGGTACCAAACATT                  | 68,31 |
| CGTCTTAATAAGCCACCGACCATGTCCTATGA                  | 70,15 |
| GCGGCCATACACCGGCTATTTGACGGTGCTAC                  | 70,31 |
| AATAAGGAGGGTATAGTACTAAAAGAGGATGT                  | 72,15 |
| ACTTTCTGCGATCGCCTCGCAACGAGGACGAT                  | 72,31 |
| GGAGGCGGATACACAACATATATTGCCAGCG                   | 74,15 |
| GGCGATACTGACTACCGTAAACGATAGGTTTC                  | 74,31 |
| CCCCGGTAGCGCTTTCAGTGTACGTTCCGCC                   | 76,15 |
| TAGTCCACGCTGTTACCACATGAACCGCTCT                   | 76,31 |
| GCTCGACCTAAATGGTAATGATTAATCCGAAT                  | 78,15 |
| TCTGGTTCAGTGGAGCCCTACTCTTACTTGC                   | 78,31 |
| TTGGCTGACACCTTTCGAGGTAGCGATATCA                   | 80,15 |
| CGAGATGTCCCACTGTACGACTCTACTCTAGCAGAACCGGGGGGCATA  | 80,31 |
| CAGAAACTTCTCATAAGCCACTACCCCCGCA                   | 82,15 |
| TTCTTTTAGGTCTACAACGGCGAGTCCGGTCTACGCTATCGCGAGCA   | 82,31 |
| ACTCTCGTATGTACCGCCGACGTCAAATCTG                   | 84,15 |
| TGGATATCATGCCAGCTGCTGGTGAAAGATACTGTACTACCGACATCC  | 84,31 |
| CGAATCGCATCTTAGTTTCCGCGTACGACTTT                  | 86,15 |
| CCCCAAGTGCTACATGGGAACTTGATGTCATGTCAAGGCCCCCGCCGA  | 86,31 |
| GCGTTAAAAGGAGATCGGAATGCACAAGAACT                  | 88,15 |
| CGTCGTCTGGTCTAAATCAAGCTGTCTGCAACCTAGGACCGTCTTGCG  | 88,31 |
| GGTAGGTTTAAACCTTACTACGCTGCTTAGGGCGGCATGCAGCACGCA  | 90,31 |
| GTGGGAGACTGCCAGTGATTAGCTTGACGGCTCGTTCGGCGAAAAT    | 92,31 |
| CCATGAAAGGACTCATTTCGTACAGCATCGCCGCTTGCTTCCCGTGCA  | 94,31 |
| ACGGGGTTTGTCAAGTTGTGGGCTTACGATTTAGCCTACGTTAGGATC  | 96,31 |
| CCAGTCCCATAAAAAGCCGTACGCACATCTGATACTTGGGAGCACTGCC | 98,31 |

#### S1.4 Z-6H×6H×128B-spiral crystal sequences

|                                                  |        |
|--------------------------------------------------|--------|
| CCAGGTAAAGTGGCTC                                 | 0,24   |
| AATCATACTCACGGTT                                 | 1,39   |
| AACTGTTGTGTCCATGTTTACTTAGGGATGGTACGAACTCAACGCAC  | 1,55   |
| GCTCGGGTAGTCTCAAGAAGATAGAGAGCATA                 | 1,71   |
| AATTCGCTAAACCGGAAAAGTATCCGCATCTCACTCAGTGATCGAGTA | 1,87   |
| TTCATGTCGCCTTTTCGAACGGTGACACACTT                 | 1,103  |
| GTGTTCAATCAGAGTAGCGGAAATATGGCCGCTTCGGTGCCGACGGG  | 1,119  |
| CCGCCTGTAACGCTTAATCAGCCCGGGCTTTT                 | 1,135  |
| GCTAATACGCTGAGCG                                 | 2,40   |
| ATGCTGTTGTTGCGGGGTTTCTGAACCGGAACCCGGGCTAATGAAGCC | 3,23   |
| GTGACCCAGAGACTGTCTGATGCACCCGGGAG                 | 3,71   |
| CCAGCCACTTAGCTGTGTCAAGTGTGATCGCGA                | 3,87   |
| GTTCCCTCTAGCTAGGGGTGATGCCAAAAGGGT                | 3,103  |
| GGATATGGAGCTGGAACGGCTCTGATTTCTAG                 | 3,119  |
| TGACCTGGTATAATGG                                 | 4,24   |
| CGGAGCTACCTGACCTCAATCATACTGCCACGGAAGGATTCATCCCC  | 5,39   |
| TTAAGAATGATCGCA                                  | 5,71   |
| CAGTCTTTGAGATGTTGAACATCTTTTGGTTGGCGTAAAGATCTCGCA | 5,103  |
| TTCTGGTGCCAAAAGTCCGACTCGTTCAAGCACTATTATCTGGCTAT  | 5,135  |
| AAAAGATGTCTGTACGCCAAGCTTAGCATAA                  | 7,23   |
| GCGGCTGGACGACCCCGCGTGGCAGCACTGA                  | 7,39   |
| CCGTGAGCCCTGCGCGACAAACGCATATCCTCGGCCCGCCAAATTA   | 7,71   |
| TAGTCGATTACGCTTCGCCTAAAGGTCCTTCC                 | 7,87   |
| ACGGTAATCGGGGGTACTCCGGCCTCCTGGTATATTAGCTTACCCA   | 7,103  |
| CTCGCGTGGCAGCTTACGACTCGTCGAACGA                  | 7,119  |
| GGACTGTTTACATAGTACTGGACGAGGTTTCACTGGGCGCTATAC    | 7,135  |
| AGGAAACTCGAGGGGCTCCCTGTCTGTGCGAGC                | 9,55   |
| CCAGCGACCACTTCTGGAGAAAGATGCGGTGG                 | 9,71   |
| CAGTAGTTGTGATTAGCTTGGGGGTGATATAC                 | 9,87   |
| CTCACTAAACTCCTTCTAATGTGACTAAGCGT                 | 9,103  |
| TAAC TCAAAGGAAACCAGCTATCCATATTC                  | 9,119  |
| GATGTAAGCGGACATCTATGCGCCCGATATCC                 | 9,135  |
| GTTCAAAGTAGGGGGCTTCTGACCAAAGCTCATGAGAATTGTAAACAG | 11,55  |
| GAACAGCTTAGAGCAGTCAAGTTCGGATACGCTACCTATGGACGGGA  | 11,87  |
| TATGCGACACCATGATCCGGATGAGTTATGAAGATCGTCATTGGGATA | 11,119 |
| TACAACTCGAAGTAAAGCATAGCACCCCTGCG                 | 11,135 |
| AAGATAGGGTCACAGC                                 | 12,24  |
| AGTAATACCTTACCTTGTGGACGTAAGCGT                   | 13,39  |
| GAAATAACGACCAGAAAGCAGGAGATTATCACGTGTACCTCGAAATA  | 13,55  |
| ATCGTTAGTTTCTCGACTGTTCCGAAACAGGC                 | 13,71  |
| AGCGGTAGCCTCCCCTAACCTATGCCTTGGTAACTGATTTTCTCCT   | 13,87  |
| GGTCCGCTAGCTGATCTATGGTCCTTAATAT                  | 13,103 |
| AACCTCGGAGGCAAGGGGAGAGGGTGAAACA                  | 13,119 |
| GGCCACCTGGCTCGGGGAGTGGCCCTCGGCA                  | 15,23  |
| GCCGCCTCGGTTATACTCGTCAAGCCTGCTTT                 | 15,39  |
| CCATAGCTAACCAGATTGTGCATTCCACGTGAGTCGACTTAAAGCAA  | 15,71  |
| ACGTGGGAGTGCCCGAGCGTCTGAGGTATGGT                 | 15,87  |
| TTACCCACTATGTTGTCTCAAGTGCTAACAGT                 | 15,103 |
| ACTAATTATCCATAACTGTGCACGTCAGGGATTCTCACCGGTGGCCGT | 15,119 |
| TGCTACATCAGTTTCTTTCGACTCCTGGGGAA                 | 15,135 |
| ACTATACTTACGCACTGGTTTGGAGGGATTAGGCAATTGCTAGGTTGC | 17,39  |
| ATTGTAGGCACAATTTTGTTCGATCACATACATGGGCAATAAAGCT   | 17,103 |
| GTAGCCTGAGGCGCGCAGCTGCACCGTGTACCTTGATATTGAGGGAC  | 17,135 |
| ACCTCGTCATTCGGATAAACCATACTGAGGGC                 | 19,23  |
| AGTGGGCGAGATCGGCTAATCATTAGTGCTCCCTTAGTTAGTTCATAG | 19,39  |
| TTCATTAGGGGCGGAAATGGGCTGGTGCCCA                  | 19,55  |
| CGTACAGTAACCAACCGGTGTACCTGTGGGTAGGGCCGAGCGCTGGG  | 19,103 |
| TTACATGTGCAAGTGAAATATATGACTTGGTC                 | 19,119 |
| GACCAGATCTGTAGAAACCACCAACATCCTCCTTGACACCTTCAAT   | 19,135 |
| TTTTAGTAAACACCCAAACAGAGCTGAACTTCC                | 21,23  |
| CATGGTCTGTTCTACTGTCTGATGATCATAGGA                | 21,39  |
| TCAAAC TAAATACGCGTACCGCCAGTTCTTG                 | 21,55  |
| TCCTTATTGGCGATCGTGCAATCCAATGTTTGTGTCGCGTGGCTTA   | 21,71  |
| TTAAGACGGCCGGTGTAAACCATATAAAGTCGT                | 21,87  |
| CCGCCTCCGGTAGTCAACCGGAACGTAATGG                  | 21,103 |
| CAGAAAGTCTATACCC                                 | 21,119 |



|                                                    |        |
|----------------------------------------------------|--------|
| GACAAAAACAGATTTGTACCGGGTGAACAGC                    | 21,135 |
| ACGTGCGGCTTCTCCT                                   | 23,23  |
| GTATCGCCTTGTTATATACTCTTTCGGGGGGGTCGAGCGCTCCACT     | 23,55  |
| GTAGTGGCCGGCCATCGTGGACTAGAAAGCGCCGCAATCTGAATATC    | 23,87  |
| GCTACCTCCGATACGCGAACCAGAACCATTTA                   | 23,103 |
| AGAGTAGGGGCAGTGC                                   | 24,120 |
| TCAGCCAAAACAGTGGGACATCTCGGAAAGGTGTCCCAAGTGCAAGTAA  | 25,23  |
| AAAAGGAATTATGAGATCATGTGGGATCCTAA                   | 25,39  |
| AGTTTCTGGTAGACCTCGTAGGGCTAGAGCGGTGATATCCACGGTACAT  | 25,55  |
| TCGTTTACTGCACGGAACGAGAGTGTGGCATAAGCAAGAGAAACCTA    | 25,71  |
| ACTTGGGGACTAAGATCGTTGCGAATTTTCGCGCGATTTCGCATGTAGC  | 25,87  |
| CGAACGAGATCGTCTT                                   | 25,103 |
| AGACGACGGATCTCCTGCATGCCGGTAGCACC                   | 25,135 |
| GTCAAATATGCGTGTCTTTAAACGCTTTAGACC                  | 27,23  |
| CAGCTTGACGCAAGACGCTAATCACTGGGCAG                   | 27,39  |
| GGTCTAGGTTGCAGAAAACCTACCCCTAAGC                    | 27,55  |
| AGCGTAGTAAGGGTTACAAGTTCCTGCGGCGG                   | 27,71  |
| CTGTACGAATGAGTCC                                   | 27,119 |
| GGCCTTGACATGACATTCTCCCACCCGTCCAA                   | 27,135 |
| CACCAGCAGGATGTCC                                   | 28,88  |
| AGCCACAACCTTGACAGTAGTACAGTATCTTTTTTCATGGCGGCGATG   | 29,39  |
| TCGCGCTTTGCTCGCGTGCCTACGGCTTTTATATAGCGTAGACCGGAC   | 29,71  |
| AACCCGTAATCGTA                                     | 29,103 |
| AGAGTCGTTATGCCCCCGGTTCTGCTAGAGTGGGACTGGATCAGATG    | 29,135 |
| TTCAGTATTCGGTGACCTCCCCGCATTACAA                    | 31,23  |
| CGCGCTTACCAAGTAAACGTATGTACGACGCGATGCGAGTGAACGGGTG  | 31,39  |
| GATGAATTCGTTTCGGGGCCAGGCGATCTAAG                   | 31,55  |
| TCTGGCGCGTGAGGACACGTAAGTTGAAGTAG                   | 31,71  |
| GAAGCTTTTCTAGCCATAGCATCGACACTACGACCTGCTTTTCGACA    | 31,103 |
| CGGACTGCATTCTGGACAGTAACTGCATTAAC                   | 31,119 |
| TACGTGCTCCCAACATAAGTGACGTCTCAGCAGTTGAAAATTATCTC    | 31,135 |
| GATAAGCAGAAGGACCTGTATAACTGGCAAGA                   | 33,23  |
| GACAAGGCCGCTTCAGAAAGGATAGCCGGACC                   | 33,39  |
| GTATTAATGCCGCGCAACCGTTTCCCGGACC                    | 33,55  |
| TAGTGTCTATCAAGTCTATTCTATGAAACCAT                   | 33,71  |
| TCTCGGGTCGAGCGGGTCACTGTTGTGACCTA                   | 33,87  |
| CGAGAAGCGTATAGATGTTCCGCGCGAATAGC                   | 33,135 |
| TCACAGGCGAACTACGTATGAATTGGTTTAAACGCTCCTCGGGAATTA   | 35,23  |
| ATACGACAGGTGGCAAACACCTCCGATGTCAGCGCCGATACCCATT     | 35,55  |
| CACTGTGAATTTCCACACCGAGGATTTCGAGGTCCATGGGATTCACCA   | 35,87  |
| AGCTCGTATACACCCTGATTCTCCATGGCAGC                   | 35,103 |
| AAGTAAACGAGCCACTTAACTGGTTTTTTTTTTTTTTTTTTTGTAGCTTT | 0,47   |
| GATACTTTGTGCGTTGAGTTCGTACCATCCCTGTTTGAACGCGTATCC   | 0,79   |
| ATTTCCGCTACTCGATCACTGAGTGAGATGCGAGCTGTTCTTCATAAC   | 0,111  |
| TTTTTTTTCCCGTGCACCCGAAGCGGCCATGTCGCATATTACTTCG     | 0,143  |
| TTTTTTTTAAACCGTGA                                  | 1,16   |
| GTATTAGCTTTTTTTT                                   | 2,47   |
| ACACTGACTATGCTCTCTATCTTCCGCTCAGCAGTTTCTCAGAAGTG    | 2,79   |
| CAGAGCCGAAGTGTGTCACCGTTCTCGCGATCAACTACTGGAAGGAGT   | 2,111  |
| TTTTTTTTAAAAGCCCGGGCTGATCTAGAAATTGGAGTTAGATGTCCG   | 2,143  |
| TTTTTTTTCAGTCTCT                                   | 3,48   |
| ATCCTTCCGGCTTCATTAGCCCGGATAGCCAGCACGCGAGCTATGTAG   | 4,15   |
| TTTTTTTTCCATTATACCAGGTACGGGGATGACATCTTTTGGGGTTCGT  | 4,47   |
| CTTTACGCCTCCCGGTGCATCAGATTTTTTTTTTTTTTTTGGCAGGG    | 4,79   |
| ATAATAGTACCCTTTTGGCATCACTGCGAGATATCGACTACACCCCG    | 4,111  |
| TTTTTTTTTGCGATCA                                   | 5,48   |
| CCCAGTAAAACCTCGTACCAGAAGTGGGACGTATGATTGAGGTCAGG    | 6,15   |
| CGCACGGCGTATAGCGTCCAAACCAGTGCCTA                   | 6,31   |
| TTTTTTTTTTCAGTCGTTAGCTCCGTTTTTTTTT                 | 6,47   |
| CGTTTGTCTTTTTTTT                                   | 6,63   |
| GCGGGCCGAGGATATGTTCTTAAACAACCAAAAGATGTTCAACATCTC   | 6,79   |
| GCCGGAGTTAATTTGCGAATCAAAAATTGTG                    | 6,95   |
| CTAATATAACAAGGAGAAAGACTGGCTTGAACGAGTCGGCAGTTTTGG   | 6,111  |
| CCAAGTCATGGGTAAGGTGACGCTGCGCGCT                    | 6,127  |
| AGCTTGGGGGATATCGTTCAGAAACCCCGCAACAACAGCATTTTTTTTT  | 8,15   |
| TTTTTTTTTATGCTAAGGTGGCCGTATAACC                    | 8,31   |
| TCTTCTCTTTTTTTTAAATGCAACAATCGGGTT                  | 8,63   |
| CTTTAGGCCACCCGAGGGGTACACAGCTAAGTGGCTGGCTAGCTA      | 8,79   |

|                                                   |        |
|---------------------------------------------------|--------|
| TCACATTAGGAAGGACTCCCACGTACAACATA                  | 8,95   |
| CGAGTCGTACGCTTAGGAGGGAACCTCCAGCTCCATATCCGTTCCGGT  | 8,111  |
| GGCGCATACGTTTCGATAATTAGTAGAACTG                   | 8,127  |
| AATTCTCATTTTTTTTTTTTTTTAGGTAGAG                   | 10,31  |
| GACAGGGACTGTTTACGTATGATTATAGGACACAACAGTTTTGAGACT  | 10,47  |
| CATAGGTAGCTCGACAGTTATTTCTCGAGAAA                  | 10,63  |
| CCCCCAAGTCCCCGTCACCCGAGCTCCGGTTTAGCGAATTGAAAAGGC  | 10,79  |
| TGACGATCGTATACACTACCGCTATCAGCTA                   | 10,95  |
| GATAGCTGTATCCCAAGACATGAATACTCTGAATGAACACTAAGCGTT  | 10,111 |
| GCTATGCTGAATATGGCGAGGGTTTTTTTTTT                  | 10,127 |
| TTTTTTTTTCGCAGGGTACAGGCGGTTTTTTTT                 | 10,143 |
| AGATTGTATTTTTTTT                                  | 11,128 |
| CCTATCTTTTTTTTTTCCGCACGTCCCCCGCA                  | 12,31  |
| CTCGTGCTGCTGTGACGGTCAGAAGCCCCCTA                  | 12,47  |
| GGTACACGTGATAATCGGGGATACGCGCTTC                   | 12,63  |
| TAGGTTAATATTTTCGAGAACTTGACTGCTCTA                 | 12,79  |
| ATCAGTTACCAAGGCAGCCACTACGCGTATCG                  | 12,95  |
| TTTTTTTTTGTTTCACCCCTCTCCAGGAGAAAATCATCCGGATCATGGT | 12,127 |
| GGGCACTCACGGCCACCTTACATCTTTTTTTTT                 | 14,15  |
| GTCCAACATGCCGAGGTACTAAAACAGTAGAA                  | 14,31  |
| AGTACGACACGCTTACTTTTTTTTGCCCTCG                   | 14,47  |
| CGGAACAGTTGCTTATAGTTTGACGATCGCC                   | 14,63  |
| TCAGACGCGCCTGTTGTCGCTGGCTAATCAC                   | 14,79  |
| GACCATAGACCATACCCGTCTAATGACTACC                   | 14,95  |
| CGTGACAATATTAAGTTAGTGAGGTTTCCTT                   | 14,111 |
| CGGTGAGAATCCCTGAACTTTCTGCAAATCTG                  | 14,127 |
| GCAATTGCTTCCCCAGAACAGTCCCTGACAGA                  | 16,15  |
| CTTGACGAGCAACCTAGACGAGGTGCCGATCT                  | 16,31  |
| TTTTTTTTAAAGCAGGCCAGCCGCTTTTTTTT                  | 16,47  |
| TGCCCATGTTTTTTTCTCGACGGGAAGCGTA                   | 16,79  |
| CACTTGAGAGCTTATTTTTTTTTTGGTTGGTT                  | 16,95  |
| ATATCAAGACTGTAGATTACCGTAGACGTGC                   | 16,111 |
| GAGTGCAAGTCCCTCAACATGTAATCTAGCAG                  | 16,127 |
| TTTTTTTTTATGTGAT                                  | 17,64  |
| GTGTCAAGGAGGATGTCAGGCTACCTAATCCC                  | 18,15  |
| AATGATTAATTGAAAAGTGTACTACTGTCAAGT                 | 18,31  |
| TAACCTAAGGGAGCACTAGTATAGTTTTTTTTT                 | 18,47  |
| TTTTTTTTCTATGAACCGTACGCACGCGAGCA                  | 18,63  |
| GGTACACCTTTTTTTTTTTTTTTTACGATTT                   | 18,95  |
| CTCGGCCCTACCCACACCTACAATGTGACACG                  | 18,111 |
| TGGTGGTTGCCAGCGAGAACCAGGGGGGCATA                  | 18,127 |
| TATGGTTTGCTGTTCAATGTAGCACCCGAGCC                  | 20,15  |
| TCATACGAGCCCTCAGTATTTGACGTCTTGCG                  | 20,31  |
| CAGCCATTCCTATGAGAGGGCGGCTCACGTGG                  | 20,47  |
| GGAATGCATGGGGCACCTAGGACCTAACCCCT                  | 20,63  |
| GCGGCCATCAAACATTAGCTATGGTCGGGCAC                  | 20,79  |
| TTCCGCGTTAAGCCAC                                  | 20,95  |
| CATATATCCATTACGGTGGGTAAGTTATGGA                   | 20,111 |
| CCCCGGTAGACCAAGTTCGTACAGATGTCATG                  | 20,127 |
| GGAGGCGGGGTATAG                                   | 21,96  |
| AGCTCTGTTTTTTTTT                                  | 22,15  |
| GCTCGACCGGAAGTCTTGCTGATCTCATAA                    | 22,31  |
| GGCGGTACAGTGGAGCGTATTACTTTCTGGTC                  | 22,47  |
| GATTGCCGCAAGAACTCAGAAACTTCCGTGCA                  | 22,63  |
| ATGTGGTTGATATTCACCTAACGATGTGGGAGG                 | 22,79  |
| TCTGGTTACGACTTTCCCAAGTAGGACGAT                    | 22,95  |
| TTTTTTTTTAAATGGTGCAGAACCCCTTGCCCTC                | 22,111 |
| TTTTTTTTTAGGAGAAG                                 | 23,0   |
| CGAGATGTGCACTGCCCTACTCTTTTTTTTTTTTTTTTTTAAACC     | 24,15  |
| ACTTGGGACACCTTTCGCCTGTGATGACATCGAGGTGGTTTGCCACC   | 24,31  |
| AGCCTACGTTACTTGCAGAGTATAATACACAA                  | 24,47  |
| TGGATATCACCGCTCTTGTCTATCTGCGAATCTCCGTGTGAAAAT     | 24,63  |
| TCGCAACGATGTACCGTAGTCCACGATGGCCG                  | 24,79  |
| CGAATCGCGCAAAAATCACAGTGAGGGTGTATACGAGCTTTTTTTTT   | 24,95  |
| TTTTTTTTGCTACATGGAGGTAGCTTTTTTTTT                 | 24,111 |
| TTTTTTTTTAGGAGATC                                 | 25,112 |
| GCGTTAAAGGTGCTACTTTTTGTCTGGGTGTT                  | 26,15  |
| CCACATGAGGTCTAAATGCTTATCTGAAGCGGCCTTGTCGGCGCGGC   | 26,31  |

|                                                  |        |
|--------------------------------------------------|--------|
| GGTAGGTTTTAGGATCCGACCATGGCTGTATT                 | 26,47  |
| ACTCTCGTGCTTAGGGATTAATACGACTTGATAGACACTACCCGCTCG | 26,63  |
| TCTTGCTTATGCCAGCAATAAGGAACACCGGC                 | 26,79  |
| TTTTTTTTTAGGTTTACCCGAGATTTTTTTT                  | 26,95  |
| CGGCATGCTTTTTTTTTTTTTTTTATCTATACGTTCTCGGGTCCTC   | 26,127 |
| CCATGAAATTGGACGGAICTGGTCATCCGAAT                 | 28,15  |
| TGATTAGCCATCGCCGTACTTGAATTAATTGGTAAGCGCGCCGAACGA | 28,31  |
| TACGCTATCTGCCAGCGCCACTTCCGCCCTAATGAATTTTTTTT     | 28,47  |
| GGAACCTGGTCCGGTCAATTCATCGTCCTCACGCGCCAGATTTTTTTT | 28,63  |
| TTTTTTTTCCGCCGA                                  | 28,79  |
| TGCTGGTGTTTTTTTTTTTTTTGGCTAGAAAAAGCTTCTCCAGAAT   | 28,95  |
| CCAGTCCCCGACATCCACTGTACGTCACCTGC                 | 28,111 |
| GTGGGAGACATCTGATGCAGTCCGATGTTGGGAGCACGTATCACCGAA | 28,127 |
| TACATACGGAGATAATTTCAACTGCTGAGGAACGACTCTAAAGATAC  | 30,31  |
| ACTTACGTCACCCGTTCACTCGCATCGCGTGTGGGCTATAAAAGC    | 30,63  |
| TTTTTTTTCTACTTCAAACGGCGATTTTTTTT                 | 30,79  |
| GATGCTATTTTTTTTTT                                | 30,95  |
| CGTCACTTTGTGAAAAAGCAGGTCGTAGTGTACGGGGTACTCTAGC   | 30,127 |
| TATCCTTTTTGTAATGCGGGGAGGGCTATTCGTCAAGGCCAGCACGCA | 32,31  |
| ATAGAATACTTAGATCGCCTGGCCGGTCCGGCTCAAGCTGTCTGCAAC | 32,63  |
| TTTTTTTTATGGTTTCACTACGCTTTTTTTTTT                | 32,79  |
| CGCGAACGTTAATGCAGTTACTGTTTTTTTTTTTTTTTGGACTCAT   | 32,127 |
| TGCGGCGCTCTTGCCAGTTATACATAATCCCCGTCGTCTCCCACTGT  | 34,31  |
| CCCATGGAGGTCCGGAAACCGTTAATGGGTATTCCTTTTAGGTCTAC  | 34,63  |
| GGAGAATCTAGGTCACAACAGTGATGGTGAATGTAACGAATCTTAGT  | 34,95  |
| TTTTTTTTGCTGCCATCTCGTTTCGTTTTTTTTT               | 34,111 |
| GAGGAGCGTTTTTTTTT                                | 34,127 |
| AATTCATACGTAGTTC                                 | 35,128 |

S1.5 Z-43H×32B-triangle crystal sequences

|                                                   |       |
|---------------------------------------------------|-------|
| CCAGGTTAAGTGGCTC                                  | 6,24  |
| AATCATACTCACGGTAACTGTTGTGTCCTATGTTTACTTAGGGATGG   | 7,39  |
| TACGAACTCAACGCACGCTCGGGTAGTCTCAAGAAGATAGAGAGCATA  | 9,23  |
| AATTCGCTAAACCGGAAAAAGTATCCGCATCTCACTCAGTGATCGAGTA | 9,39  |
| TTCATGTCGCCTTTTCGAACGGTGACACACTTGTGTTTCATTAGAGTA  | 21,23 |
| GCGGAAATATGGCCGCTTCGGTGCGCAGCGGG                  | 21,39 |
| CCGCCTGTAACGCTTAATCAGCCCGGGCTTTTGCTAATACGCTGAGCG  | 23,39 |
| ATGCTGTTGTTGCGGGGTTTCTGAACCGGAAC                  | 25,23 |
| CCGGGCTAATGAAGCCGTGACCCAGAGACTGTCTGATGCACCGGGAG   | 25,39 |
| CCAGCCACTTAGCTGTGTGATGTCGCGAGTCCCTCTAGCTAGG       | 27,23 |
| GTGATGCCAAAAGGGTGGATATGGAGCTGGAA                  | 27,39 |
| CGGCTCTGATTTCTAGTGACCTGGTATAATGGCGGAGCTACCTGACCT  | 35,23 |
| CAATCATACTCCACGGAAGGATTATCCCC                     | 35,39 |
| TTAAGAATGATCGCACAGTCTTTGAGATGTT                   | 37,23 |
| GAACATCTTTGGTTGGCGTAAAGATCTCGCA                   | 37,39 |
| TTCTGGTGCCAAAAGTCCGACTCGTTCAAGCACTATTATCTGGCTAT   | 39,39 |
| AAAAGATGTCTGTCTAGCCCAAGCTTAGCATAA                 | 41,23 |
| GCGGCTGGACGACCCCGCTGCGACGACTGACCGTCGAGCCCTGCGC    | 41,39 |
| GACAAACGCATATCTCGGCCCGCCAAATTA                    | 43,23 |
| TAGTCGATTACGCTTCGCCTAAAGGTCCTCC                   | 43,39 |
| ACGGTAATCGGGGGTACTCCGGCTCCTTGGTATATTAGCTTACCCA    | 45,23 |
| CTCGCGTGGCACGCTTACGACTCGTCGAACGA                  | 45,39 |
| GGACTGTTCTACATAGTACTTGGACGAGGTTTACTGGGCGCTATAC    | 49,23 |
| AGGAAACTCGAGGGGCTCCCTGTCTGTGAGC                   | 49,39 |
| CCAGCGACCACTTCTGGAGAAAAGATGCGGTGG                 | 51,23 |
| CAGTAGTTGTGATTAGCTTGGGGGTGATATAC                  | 51,39 |
| CTCACTAAACTCCTTCTAATGTGACTAAGCGT                  | 53,23 |
| TAACCTCAAAGGAAACCAGCTATCCCATATC                   | 53,39 |
| GATGTAAGCGGACATCTATGCGCCCGATATCCGTTCAAAGTGGGGGGC  | 55,39 |
| TTCTGACCAAAGCTCATGAGAATTGTAAACAG                  | 57,23 |
| GAACAGCTTAGAGCAGTCAAGTTCGGATACGCTACCTATGGACGGGGA  | 57,39 |
| TATGCGACACCATGATCCGGATGAGTTATGAA                  | 59,23 |
| GATCGTCATTGGGATATACAATCTCGAAGTAA                  | 59,39 |
| AGCATAAGCACCTGCGAAGATAGGGTCACAGC                  | 61,23 |
| AGTAATACCTTACCTTGTGGACGTAAGCGT                    | 61,39 |
| GAAATAACGACCAGAAAAGCACGAGGATTATCACGTGTACTCGAAATA  | 63,23 |
| AAGTAAACGAGCCACTTAACCTGGCCATCCCTAGTTCGTATCCGGTTT  | 6,15  |
| CACTGAGTGAGATGCGGTATGATTATAGGACACAACAGTTAACCGTGA  | 8,15  |
| GATACTTTTACTCGATGGGCTGATTAAGCGTT                  | 8,31  |
| ACCCGAGCTATGCTCTATCTTCTTGAGACTGACATGAAGCGGCCAT    | 10,15 |
| CACCGTTCTACTCTGAATGAACACAAGTGTGTGGCTGGACCCTTTT    | 20,15 |
| GTATTAGCCCCGCTGCAGCGAATTGTGCGTTG                  | 22,15 |
| GCACCGAACGCTCAGCAACAGCATGGCTTCAT                  | 22,31 |
| GCATCAGACAGTCTTACAGGCGGAAAAGCCC                   | 24,15 |
| GGGGTACCTCCCGGTGAGTCGGCAGTTTGG                    | 24,31 |
| TCAGAAACTTCCAGCTATTTCCGCGAAAAGGC                  | 26,15 |
| CCATATCCGTTCCGGTTTCTTAAACAACCAA                   | 26,31 |
| ACACTGACCCTAGCTAGAGGGAACTCGCGATCCAGAGCCGGTGGGACG  | 28,15 |
| CCAGGTCAAAGGTCAGGTAGCTCCGCCATTATAATTACCGTAGACGTGC | 34,15 |
| AAAGACTGGGGGATGAGGCATCACACAGCTAA                  | 36,15 |
| ATCCTTCCAACATCTCCGTTTGTGCGAAGCGTA                 | 36,31 |
| ATAATAGTTGCGAGATTAGCCCGGCCGCAAC                   | 38,15 |
| CTTTACGCATAGCCAGCATCTTTGGGGTCTGT                  | 38,31 |
| CTCGACGGTCAGTCGTACCAGAAGCTTGAAC                   | 40,15 |
| CGCACGGCGCGCAGGGGGCGCATAGATGTCCG                  | 40,31 |
| AGCTTGGGGGAAGGACAGATGTTCTGCGATCA                  | 42,15 |
| CTTTAGGCTTATGCTATTAGTGAGGTTTCCTT                  | 42,31 |
| GCGGGCCGTCGTTTCGATATGATTGCTAGAAAT                 | 44,15 |
| CGAGTCGTTAATTTGGTCGCTGGCTAATCAC                   | 44,31 |
| GCCGGAGTTGGGTAAGCTAATATACCAAGGAGAACAGTCCGCCCTCG   | 46,15 |
| CCAAGTCAGTATAGCG                                  | 48,15 |
| CCCAGTGAACCTCGTGTATTCTGATAATCCTCGTGCTTTCTGGTC     | 48,31 |
| TCTTTCTCGCTCGACACACGCGAGCACCCCG                   | 50,15 |
| GACAGGGACCACCGCAGCTATGCTAGGTAGAGGTATTACTCGCAGGGT  | 50,31 |
| TCACATTAGTATATCAATCGACTAAGGATATG                  | 52,15 |

|                                                   |       |
|---------------------------------------------------|-------|
| CCCCAAGACGCTTAGGTCGCATATATCCAATGACGATCATCATGGT    | 52,31 |
| GTTTGAACGAATATGGCCAGCCGCCTGACAGA                  | 54,15 |
| GATAGCTGGCCCCCTAGGTCAGAACTGCTCTAAGCTGTTCTGAGCTTT  | 54,31 |
| GAACTTGATCCCCGTCCATAGGTAGCGTATCCCTTACATCGGATATCG  | 56,31 |
| AGATTGTAAGTGTTTACAATTCTCATTACTTCGTGGAGTTAGAAGGAGT | 58,31 |
| GTCCAAACATTCATAACTCATCCGGACGCTTACAACACTGCAGAAGTG  | 60,31 |
| GGTACACGGCTGTGACCCTATCTTTATTTGAAGTTTCTCTATGTAG    | 62,31 |

S1.6 Z-44H×32B-hexagon crystal sequences

|                                                   |       |
|---------------------------------------------------|-------|
| CCAGGTAAAGTGGCTCAATCATACTCACGGTAACTGTTGTGTCCTAT   | 5,23  |
| GTTTACTTAGGGATGGTACGAACTCAACGCAC                  | 5,39  |
| GCTCGGGTAGTCTCAAGAAGATAGAGAGCATAAATTCGCTAAACCGGA  | 7,39  |
| AAAGTATCCGCATCTCACTCAGTGATCGAGTA                  | 9,23  |
| TTCATGTCGCCTTTTCGAACGGTGACACACTTGTGTTCAATTCAGAGTA | 9,39  |
| GCGGAAATATGGCCGTTTCGGTGCGCAGCGGGCCGCTGTAACGCTTA   | 11,23 |
| ATCAGCCCAGGGCTTTTGCTAATACGTGAGCG                  | 11,39 |
| ATGCTGTTGTTGCGGGGTTTCTGAACCGGAACCCGGGCTAATGAAGCC  | 19,23 |
| GTGACCCAGAGACTGTCTGATGCACCGGGAG                   | 19,39 |
| CCAGCCACTTAGCTGTGTGATGTGATCGCGA                   | 21,23 |
| GTTCCCTCTAGCTAGGGTGATGCCAAAAGGGT                  | 21,39 |
| GGATATGGAGCTGGAACGGCTCTGATTTCTAGTGACCTGGTATAATGG  | 23,39 |
| CGGAGCTACCTGACCTCAATCATACTGCCAC                   | 25,23 |
| GGAAGGATTCATCCCTTTAAGAATGATCGCACAGTCTTTGAGATGTT   | 25,39 |
| GAACATCTTTTGTTGGCGTAAAGATCTCGCA                   | 27,23 |
| TTCTGGTGCCAAAAGTCCGACTCGTTCAAGC                   | 27,39 |
| ACTATTATCTGGCTATAAAAAGATGTCTGTGACGCCAAGCTTAGCATAA | 29,23 |
| GCGGCTGGACGACCCCGCGTGCGACGACTGA                   | 29,39 |
| CCGTCGAGCCCTGCGCGAAAACGCATATCCTCGGCCCGCCAAATTA    | 33,23 |
| TAGTCGATTACGCTTCGCCTAAAGGTCCTTCC                  | 33,39 |
| ACGGTAATCGGGGGTACTCCGGCTCCTTGG                    | 35,23 |
| TATATTAGCTTACCCACTCGCGTGGCACGTCT                  | 35,39 |
| ACGACTCGTGAACGAGGACTGTTCTACATAG                   | 37,23 |
| TGACTTGGACGAGGTTTACTGGGCGTATACAGGAACTCGAGGGGC     | 37,39 |
| TCCCTGTCTGTGCGAGCCAGCGACCACTTCTG                  | 43,23 |
| GAGAAAAGATGCGGTGGCAGTAGTTGTGATTAGCTTGGGGGTGATATA  | 43,39 |
| CTCACTAAACTCCTTCTAATGTGACTAAGCGT                  | 45,23 |
| TAACCTCAAAGGAAACCAGCTATCCCATATTC                  | 45,39 |
| GATGTAAGCGGACATCTATGCGCCCGATATCCGTTCAAAGTGGGGGC   | 47,23 |
| TTCTGACCAAAGCTCATGAGAATTGTAACAGGAACAGCTTAGAGCAG   | 49,23 |
| TCAAAGTTCGGATACGCTACCTATGGACGGGGA                 | 49,39 |
| TATGCGACACCATGATCCGGATGAGTTATGAA                  | 51,23 |
| GATCGTCATTGGGATATAAATCTCGAAGTAAAGCATAGCACCCCTGCG  | 51,39 |
| AAGATAGGGTCACAGCAGTAATACCTCTACCT                  | 61,23 |
| TGTTGGACGTAAGCGTGAAATAACGACCAGAAAGCAGGATTATCA     | 61,39 |
| CGGTACCTCGAAATAATCGTTAGTTTCTCGACTGTCCGAAACAGGC    | 63,23 |
| GTATGATTATAGGACACAACAGTTAACCGTGAATTTCCGAAAAAGCCC  | 4,15  |
| AGCGAATTGTGCGTTGAGTTCGATCCGGTTTGATACTTTGAAAAGGC   | 6,15  |
| ATGAACACAAGTGTGTACCCGAGCTATGCTCTCTATCTTCTTGAGACT  | 8,15  |
| CACCGTTCTACTCTGACAGAGCCGTCCAGCT                   | 8,31  |
| CACTGAGTCGCTCAGCAAGTAAACGAGCCACTTAACTGGCCATCCCT   | 10,15 |
| GTATTAGCTACTCGATGTGGCTGGCCTAGCTA                  | 10,31 |
| GCACCGAATAAGCGTTACAGGCGGGCCGCTGCAACAGCATCAGTCTCT  | 12,15 |
| TCAGAAAACGGCTTCATTAGCCCGGGTTCGGGTATAATAGTGGGGTCGT | 18,15 |
| ACACTGACCTCCCGGTGGGCTGATGCGCCAT                   | 20,15 |
| GCATCAGATCGCGATCAGATGTTCAAGTTTGG                  | 20,31 |
| CCAGGTCAACCCTTTGACATGAAGAGATGCG                   | 22,15 |
| GGCATCACCCATTATATAGCTCCGGGGGATGA                  | 22,31 |
| TTCTTAAAAACATCTCAAAGACTGTGCGATCACCATATCCCTAGAAAT  | 24,31 |
| TATGATTGGCTTGAACGAGGGAACACAGCTAA                  | 26,15 |
| GAGTCGGCGTGGGACGCGAGTCGTAACCTCGT                  | 26,31 |
| CTTACGCTCAGTCGTGGGGTCAACCCGCAAC                   | 28,15 |
| CGCACGGCTGCGAGATATTACCGTTGGGTAAG                  | 28,31 |
| CATCTTTTATGCTAAGCTTGGGCTGACAGACTCGACGGGAAGCGTA    | 30,15 |
| CGTTTGTCTTAATTTGGCGGGCCGAGGATATGCTTACATCGGATATCG  | 32,15 |
| GCCGGAGTGAAGGACCCAGCCGCATAGCCAG                   | 34,15 |
| CTTAGGCCCAAGGAGTTAGTGAGGTTTCCTT                   | 34,31 |
| AACAGTCCAGACGTGCCACCAGAAACAACCAA                  | 36,15 |
| CACGCGAGCTATGTAGGACAGGGACCACCGCA                  | 36,31 |
| CCCAGTGAGCCCTCGAGTTTCCGTATAGCGATCCTTCCAGGTCAGG    | 38,31 |
| AACTACTGGTATATCACCCCAAGCTAATCACCCAAGTCATCGTTTCA   | 42,31 |
| GTCGCTGGGAATATGGCTAATATACACCCCG                   | 44,15 |
| GATAGCTGCAGAAGTGGTCGCATATATCCCAA                  | 44,31 |
| TCACATTAGCCCCCTAATCGACTAGCGCAGGG                  | 46,15 |
| GTTTGAACACGCTTAGGGTCAGAAGCGTATCC                  | 46,31 |

|                                                   |       |
|---------------------------------------------------|-------|
| AATTCTCACTGCTCTAGGCGCATAGATGTCCG                  | 48,15 |
| AGCTGTTCTGTTTACGGTACACGTCGAGAACTAACGATTATTCGA     | 48,31 |
| TCATCCGGTCCCGTCTGGAGTTAGAAGGAGT                   | 50,15 |
| CATAGGTATTCATAACCCATCTTACGTTACGTCCAACAGCTGTGAC    | 50,31 |
| AGATTGTACGCAGGGTGCTATGCTTTACTTCGTCTTTCTCGCTCGACA  | 52,31 |
| GTTATTTCTGATAATCCTCGTGCTTTCTGGTCTGACGATCATCATGGT  | 60,31 |
| CGGAACAGAGGTAGAGGTATTACTGCCTGTTTGAAC TTGATGAGCTTT | 62,31 |

S1.7 Z-56H×32B-tunnel crystal sequences

|                                                    |       |
|----------------------------------------------------|-------|
| CCAGGTAAAGTGGCTCAATCATACTCACGGTTAACTGTTGTGTCCTAT   | 1,23  |
| GTTTACTTAGGGATGGTACGAACTCAACGCAC                   | 1,39  |
| GCTCGGTAGTCTCAAGAAGATAGAGAGCATA                    | 3,23  |
| AATTCGCTAAACCGGAAAAAGTATCCGCATCTC                  | 3,39  |
| ACTCAGTGATCGAGTATTCATGTCGCCTTTTC                   | 5,23  |
| GAACGGTGACACACTTGTGTTTCATTCAGAGTA                  | 5,39  |
| GCGGAAATATGGCCGCTTCGGTGCAGCGGGCCCGCTGTAACGCTTA     | 7,39  |
| ATCAGCCCCGGCTTTTGCTAATACGTGAGCG                    | 9,23  |
| ATGCTGTTGTTGCGGGGTTTCTGAACCGGAACCCGGGCTAATGAAGCC   | 9,39  |
| GTGACCCAGAGACTGTCTGATGCACCGGGAG                    | 11,23 |
| CCAGCCACTTAGCTGTGTGATGATCGCGA                      | 11,39 |
| GTTCCCTCTAGCTAGGGTGATGCCAAAAGGGT                   | 13,23 |
| GGATATGGAGCTGGAACGGCTCTGATTTCTAG                   | 13,39 |
| TGACCTGGTATAATGGCGGAGCTACCTGACCTCAATCATAACGTCCAC   | 15,23 |
| GGAAGGATTCATCCCTTTAAGAAATGATCGCACAGTCTTTGAGATGTT   | 17,23 |
| GAACATCTTTTGGTTGGCGTAAAGATCTCGCATTCTGGTGCCAAAAC    | 17,39 |
| GCCGACTCGTTCAAGCACTATTATCTGGCTATAAAAAGATGCTGTGTCAG | 21,23 |
| CCCAAGCTTAGCATAAGCGGCTGGACGACCCCGCCGTGCGACGACTGA   | 23,39 |
| CCGTCGAGCCCTGCGCGACAAACGCATATCCTCGGCCCGCCAAATTA    | 25,23 |
| TAGTCGATTACGCTTCGCCTAAAGGTCTTCCACGGTAATCGGGGGTG    | 25,39 |
| ACTCCGGCCTCCTTGGTATATTAGCTTACCCACTCGCGTGGCACGTCT   | 29,39 |
| ACGACTCGTCGAACGAGGACTGTTCTACATAGTACTTGGACGAGGTT    | 31,23 |
| TACTGGGCGCTATACAGGAACTCGAGGGGCTCCCTGTCTGTGCGAGC    | 33,23 |
| CCAGCGACCACTTCTGGAGAAAGATGCGGTGGCAGTAGTTGTGATTAG   | 33,39 |
| CTTGGGGGTGATATACCTCACTAAACTCCTTCTAATGTGACTAAGCGT   | 37,23 |
| TAACCTCAAAGGAAACAGCTATCCATATTCGATGTAAGCGGACATC     | 39,39 |
| TATGCGCCCGATATCCGTTCAAACCTAGGGGGCTTCTGACCAAAGCTCA  | 41,23 |
| TGAGAATTGTAACAGGAACAGCTTAGAGCAGTCAAGTTCGGATACGC    | 41,39 |
| TACCTATGGACGGGATATGCGACACCATGATCCGGATGAGTTATGAA    | 45,39 |
| GATCGTCATTGGGATATAAATCTCGAAGTAAAGCATAGCACCCCTGCG   | 47,23 |
| AAGATAGGGTACAGCAGTAATACCTTACCTTGTGGACGTAAGCGT      | 49,23 |
| GAAATAACGACCAGAAAGCACGAGGATTATCA                   | 49,39 |
| CGTGTACCTCGAAATAATCGTTAGTTTCTCGA                   | 51,23 |
| CTGTTCCGAAACAGGCAGCGGTAGCCTCCAC                    | 51,39 |
| TTAACCTATGCCTTGGTAACTGATTTTCTCCT                   | 53,23 |
| GGTTCCGCTAGCTGATCTATGGTCCTTAATAT                   | 53,39 |
| AACCTCGGAGGCAAGGGGAGAGGGTGAAACAGGCCACCTGGCTCGGG    | 55,39 |
| GAGTGCCCCCTCGGCAGCCGCTCGGTTATAC                    | 57,23 |
| TCGTCAAAGCCTGCTTTCATAGCTAACCCGATTGTGCATTCCACGTGA   | 57,39 |
| GTCGTACTTAAAGCAAACGTGGGAGTGCCGA                    | 59,23 |
| GCGTCTGAGGTATGGTTTACCCACTATGTTGT                   | 59,39 |
| CTCAAGTGCTAACAGTACTAATTATCCATAAC                   | 61,23 |
| TGTGCACGTCAGGGATTCTACCCGTTGGCCGT                   | 61,39 |
| TGCTACATCAGTTTCTTTCGACTCCTGGGAAACTATACTTACGCACT    | 63,23 |
| GTATGATTATAGGACACAACAGTTAACCGTGACCAGGTCAAGGTCAGG   | 0,15  |
| CTATCTTCGTGCGTTGAGTTCGTATATGCTCTGAGGGAACCTTCCAGCT  | 2,15  |
| GACATGAAGAGATGCGGATACTTTGAAAAGGCGGGTACACAGCTAA     | 4,15  |
| ACAGGCGTACTCTGAATGAACACTAAGCGTTGGGCTGATCCCGCAAC    | 6,15  |
| TAGCCCGGGTCCGGTATTTCCGCCCGCTGCGCACCGAAGCGGCCAT     | 8,15  |
| TCAGAAAACGGCTTCATCCAGCCGCTTATGCTA                  | 8,31  |
| GTATTAGCTCGGATCCACCGTTCTACTCGATCACTGAGTAAGTGTGT    | 10,15 |
| ACACTGACCGCTCAGCGAGTCGGCATAGCCAG                   | 10,31 |
| GTGGCTGGCAGTCTCT                                   | 11,32 |
| GCATCAGACTAGAAATAGCGAATTTTGGAGACTACCCGAGCTCCGGTTT  | 12,15 |
| CAGAGCCGCTCCCGT                                    | 12,31 |
| GGCATCACGTGGGACGAAGTAAACGAGCCACTTAACCTGGCCATCCCT   | 14,15 |
| TATGATTGACCTTTTATCCTTCCCAACCAA                     | 14,31 |
| TTCTTAAAAACATCTCTAGCTCCGCCATTATA                   | 16,15 |
| AAAGACTGTGCGATCACGAGTCGTCTATGTAG                   | 16,31 |
| CACCAGAATGCGAGATCCATATCCCTAGCTA                    | 18,15 |
| CTTACGCAGTTTTGGCTAATATACCAAGGAG                    | 18,31 |
| CGCACGGCTGACAGAAACAGCATAAAAAGCCC                   | 22,15 |
| CATCTTTTTCAGTCTGCTGACGGGAAGCGTA                    | 22,31 |
| ATTACCGTGAAGGACAGCTTGGGGGGTCTGT                    | 24,15 |
| CTTATAGGCCACCCCGGATAGCTGGTTTCTT                    | 24,31 |



|                                                   |       |
|---------------------------------------------------|-------|
| CGTTTGCTTAATTTGATAATAGTGCTTGAAC                   | 26,15 |
| GCGGGCCGAGGATATGCCCCAAGGAAGGAGT                   | 26,31 |
| CACGCGAGAACCTCGTAGATGTTTCGGGGATGA                 | 30,15 |
| CCAAGTCAAGACGTGCCCCAGTGACAGAAGTG                  | 30,31 |
| AGTTTCCTGCTCGACAAACAGTCCCTCGTTCGA                 | 32,15 |
| GACAGGGAGCCCCTCGTGACGATCTTACTTCG                  | 32,31 |
| AACTACTGCCACCGCAGCCGGAGTTGGGTAAG                  | 34,15 |
| TCTTCTCCTAATCACGTCCGATATCCCCGTC                   | 34,31 |
| CTTACATCACGCTTAGATCGACTAGCGCAGGG                  | 38,15 |
| TCACATTAGATGTCCGGGCGCATACTGTTTAC                  | 38,31 |
| GAACTTGACTGCTCTATGGAGTTAGAATATGG                  | 40,15 |
| AGCTGTTTCGGTATCCCCTCTCCCCTTGCCTC                  | 40,31 |
| GTTTGAAGTGAAGCTTTTGTAGGATATATCA                   | 42,15 |
| GGTCAGAAGCCCCCTATAGGTTAAATCAGCTA                  | 42,31 |
| TCATCCGGGCGCAGGGTGTGCTGGGTATAGCG                  | 46,15 |
| GCTATGCTTTCATAACCCCTATCTTTTCTGGTC                 | 46,31 |
| GTATTACTACGCTTACAGATTGTATATCCCAA                  | 48,15 |
| GTCCAACAAGGTAGAGATGTAGCATTCCCCAGGAGTGCAAAGAAACTG  | 48,31 |
| CTAACGATTGATAATCCATAGGTAATCATGGT                  | 50,15 |
| CTCGTGCTTCGAGAAACACTTGAGATCCCTGACGTGCACAACTGTTAG  | 50,31 |
| GGTACACGGCCTGTTT                                  | 51,16 |
| ATCAGTTAGTGGGAGG                                  | 52,15 |
| CTACCGCTAGGAGAAAAGTACGACACCATACTCAGACGCTTGCTTTA   | 52,31 |
| AGGTGGCCATATTAAGAATTCTCAGGATATCG                  | 54,15 |
| GACCATAGCCCCGAGCCGGGCACTCAAAGCAGGCTTGACGATGCCGAGG | 54,31 |
| AGCTATGGTCACGTGGAATGCACAATCGGGTTCGAGGGTTTGTTCAC   | 56,31 |
| GTGGGTAAGTATAACCGAGGCGGCACAAACATAGCGGAACCCCAAGGCA | 58,31 |
| CGGTGAGATCGGGCACTCCCACGTACGGCCACCGGAACAGTATTTCGA  | 60,31 |
| AGTATAGTGTATGGATAATTAGTAGTGCGTAGTTATTTTCGCTGTGAC  | 62,31 |

## S1.8 Z-60H×64B-tunnel crystal sequences

|                                                   |       |
|---------------------------------------------------|-------|
| CCAGGTAAAGTGGCTCAATCATACTCACGGTAACTGTTGTGTCCTAT   | 1,23  |
| GTTTACTTAGGGATGGTACGAACTCAACGCAC                  | 1,39  |
| GCTCGGTAGTCTCAAGAAGATAGAGAGCATAAAATTCGCTAAACCGGA  | 1,55  |
| AAAGTATCCGCATCTCACTCAGTGATCGAGTA                  | 1,71  |
| TTCATGTCGCCTTTTCGAACGGTGACACACTT                  | 3,23  |
| GTGTTCAATCAGAGTAGCGGAAATATGGCCGC                  | 3,39  |
| TTCGGTGCGCAGCGGGCCGCTGTAACGCTTA                   | 3,55  |
| ATCAGCCCGGGCTTTGCTAATACGCTGAGCG                   | 3,71  |
| ATGCTGTTGTTGCGGGTTTTCTGAACCGGAAC                  | 5,23  |
| CCGGGCTAATGAAGCCGTGACCCAGAGACTG                   | 5,39  |
| TCTGATGCACCGGGAGCCAGCCACTTAGCTGT                  | 5,55  |
| GTCAGTGTGATCGCGAGTTCCCTCTAGCTAGG                  | 5,71  |
| GTGATGCCAAAAGGGTGGATATGGAGCTGGAACGGCTCTGATTTCTAG  | 7,39  |
| TGACCTGGTATAATGGCGGAGCTACCTGACCTCAATCATACTGCCAC   | 7,71  |
| GGAAGGATTCATCCCTTTAAGAAATGATCGCA                  | 9,23  |
| CAGTCTTTGAGATGTTGAACATCTTTTGGTTGGCGTAAAGATCTCGCA  | 9,39  |
| TTCTGGTGCCAAAAC TGCCGACTCGTTCAAGC                 | 9,55  |
| ACTATTATCTGGCTATAAAAAGATGCTGTCAGCCCAAAGCTTAGCATAA | 9,71  |
| GCGGCTGGACGACCCCGCCGTGCGACACTGA                   | 11,23 |
| CCGTGAGCCCTGCGGCAAAAACGCATATCCT                   | 11,39 |
| CGGCCCGCCAAATTAATAGTCGATTACGCCTC                  | 11,55 |
| GCCTAAAGGTCTTCCACGGTAATCGGGGGTG                   | 11,71 |
| ACTCCGGCCTCCTTGGTATATTAGCTTACCCA                  | 13,23 |
| CTCGGTGGCAGCTCTACGACTCGTCGAACGA                   | 13,39 |
| GGACTGTTCTACATAGTACTTGACGAGGTT                    | 13,55 |
| TCACTGGGCGCTATACAGGAACTCGAGGGGC                   | 13,71 |
| TCCCTGTCTGTGAGCCAGCGACCACTTCTGGAGAAAGATGCGGTGG    | 15,23 |
| CAGTAGTTGTGATTAGCTTGGGGGTGATATACCTCACTAAACTCCTTC  | 15,55 |
| TAATGTGACTAAGCGTTAACTCCAAGGAAACCAGCTATCCCATATTC   | 17,23 |
| GATGTAAGCGGACATCTATGCGCCCGATATCC                  | 17,39 |
| GTTCAAAC TAGGGGGCTTCTGACCAAAGCTCATGAGAATTGTAAACAG | 17,55 |
| GAACAGCTTAGAGCAGTCAAGTTCGGATACGC                  | 17,71 |
| TACCTATGGACGGGATATGCGACACCATGAT                   | 19,23 |
| CCGGATGAGTTATGAAAGATCGTCATTGGGATA                 | 19,39 |
| TACAACTCTCGAAGTAAAGCATAGCACCTGCG                  | 19,55 |
| AAGATAGGGTCACAGCAGTAATACCTCTACCT                  | 19,71 |
| TGTTGGACGTAAGCGTGAAATAACGACCAGAA                  | 21,23 |
| AGCACGAGGATTATCACGTGTACCTCGAAATA                  | 21,39 |
| ATCGTTAGTTTCTCGACTGTTCCGAAACAGGC                  | 21,55 |
| AGCGGTAGCCTCCCACTTAACTATGCCTTGG                   | 21,71 |
| TAAC TGATTTTCTCCTGGTTCCGCTAGCTGATCTATGGTCCTTAATAT | 23,39 |
| AACCCTCGGAGGCAAGGGGAGAGGGTGAAACAGGCCACCTGGCTCGGG  | 23,71 |
| TTTTTTTTGAGTGCCC                                  | 24,8  |
| CCTCGGCATTTTTTTTTTTTTTTGGCCCTCGGTTATACTCGTCAAG    | 25,23 |
| CTGCTTTCCATAGCTAACCCGATTGTGCATTCCACGTGATTTTTTTT   | 25,39 |
| TTTTTTTTGTGCTACTTAAAGCAATTTTTTTT                  | 25,55 |
| ACGTGGGAGTGCCCGAGCGTCTGATTTTTTTTTTTTTTTTGGTATGGT  | 29,39 |
| TTTTTTTTTACCACACTATGTTGTTTTTTTTT                  | 29,55 |
| CTCAAGTGTTTTTTTTT                                 | 31,23 |
| TTTTTTTTCTAACAGTACTAATTATCCATAACTGTGCACGTCAGGGAT  | 31,55 |
| TCTCACCGTTTTTTTTTTTTTTTGTGGCCGTTGCTACATCAGTTTCT   | 33,23 |
| TTGCACTCCTGGGAAACTATACTTACGCACTGGTTGGATTTTTTTT    | 33,39 |
| TTTTTTTTGGGATTAGGCAATTGCTTTTTTTT                  | 33,55 |
| TTTTTTTTTAGGTTGC                                  | 34,8  |
| ATTGTAGGTTTTTTTTT                                 | 37,23 |
| TTTTTTTTACAATTTTTTGATTCGATCACATACATGGGCAATAAAGCT  | 37,55 |
| GTAGCCTGAGGCGCGCAGCTGCACTTTTTTTTTTTTTTTTCGTGTCAC  | 39,39 |
| TTTTTTTTCTTGATATTGAGGGACTTTTTTTT                  | 39,55 |
| ACCTCGTCATTTCGATAAACCATACTGAGGGC                  | 41,23 |
| AGTGGGCGAGATCGGCTAATCATTAGTGCTCCCTTAGTTAGTTCATAG  | 41,39 |
| TTCATTAGGGGCGGAAATGGGCTGGTGCCCA                   | 41,55 |
| CGTACAGTAACCAACCGGTGTACCTGTGGGTAGGGCCGAGCGCTGGGC  | 41,71 |
| TTACATGTGCAAGTGAAATATATGACTTGGTC                  | 43,23 |
| GACCAGATCTGCTAGAAACCAACCAACATCCTC                 | 43,39 |
| CTTGACACCTTTCAATTTTTAGTAAACACCCA                  | 43,55 |
| ACAGAGCTGAACTTCCCATGGTCTGTTCTACTG                 | 43,71 |

|                                                   |       |
|---------------------------------------------------|-------|
| TCGTATGATCATAGGATCAAATAAATACAGC                   | 45,23 |
| GTACCGCCAGTTCTTGTCTTATTGGCGATCG                   | 45,39 |
| TGCATTCCAATGTTTGTATGGCCGCGTGGCTTA                 | 45,55 |
| TTAAGACGGCCGGTGTAAACCACATAAAGTCGT                 | 45,71 |
| CCGCCTCCGGTAGTCAACGCGGAACGTAATGGCAGAAAGTCTATACCC  | 47,23 |
| GACAAAAACAGATTTGTACCGGGGTGAACAGCACGTGCGGCTTCTCCT  | 47,55 |
| GTATCGCCTTGTGATTTATACTCTTGCAGGGGGGTCGAGCGCTCCACT  | 49,23 |
| GTAGTGGCCGGCCATCGTGGACTAGAAAGCGC                  | 49,39 |
| CGGCAATCTGAATATCGCTACCTCCGATACGGAACCAGAACCATTTA   | 49,55 |
| AGAGTAGGGCAGTGCTCAGCCAAACAGTGGG                   | 49,71 |
| ACATCTCGGAAAGGTGTCCCAAGTGCAAGTAA                  | 51,23 |
| AAAAGGAATTATGAGATCATGTGGGATCCTAA                  | 51,39 |
| AGTTTCTGGTAGACCTCGTAGGCTAGAGCGGT                  | 51,55 |
| GATATCCACGGTACATTGTTTACTGCACGGA                   | 51,71 |
| ACGAGAGTGTGGCATAAGCAAGAGAAACCTA                   | 53,23 |
| ACTTGGGGACTAAGATCGTTGCGAATTTTCGC                  | 53,39 |
| GCGATTTCGATGTAGCCGAACGAGATCGTCT                   | 53,55 |
| AGACGACGGATCTCCTGCGATGCCGGTAGCACC                 | 53,71 |
| GTCAAATATGCGTGCTTTTAAACGCTTTAGACCCAGCTTGACGCAAGAC | 55,39 |
| GCTAATCACTGGCAGGGTCTAGGTTGCAGAAACCTACCCCTAAGC     | 55,71 |
| AGCGTAGTAAGGGTTACAAGTTCCTGCGGCGG                  | 57,23 |
| CTGTACGAATGATCCGGCCTTGACATGACATTCTCCACCCGTCCAA    | 57,39 |
| CACCAGCAGGATGTCGAGCCACAACCTTGACA                  | 57,55 |
| GTAGTACAGTATCTTTTTCATGGCGGCGATGTCGCCGTTTGTCTCGC   | 57,71 |
| TGCGTACGGCTTTTATATAGCGTAGACCGGAC                  | 59,23 |
| AACCCCGTAAATCGTAAGAGTCTTATGCCCC                   | 59,39 |
| CCGGTCTGCTAGAGTGGGACTGGATCAGATG                   | 59,55 |
| TTCAAGTATTCGGTGACCTCCCCGCATTACAA                  | 59,71 |
| CGCGTTACCAAGTAACGTATGTACGACGCGA                   | 61,23 |
| TGCGAGTGAACGGGTGGATGAATTTTCGTTCCG                 | 61,39 |
| GGCCAGGCGATCTAAGTCTGGCGCGTGAGGAC                  | 61,55 |
| ACGTAAGTTGAAGTAGGAAGCTTTTTCTAGCC                  | 61,71 |
| ATAGCATCGACACTACGACCTGCTTTTCGACACGGACTGCATTCTGGA  | 63,23 |
| CAGTAACTGCATTAACCTACGTCTCCCAACATAAGTGACGCTCCTCAGC | 63,55 |
| GTATGATTTCCGGTTTAGCGAATTTATGCTCTAACTACTGCAGAAAGTG | 0,15  |
| CTATCTTCATAGGACACAACAGTTAACCGTGAGACAGGGAGTATATCA  | 0,47  |
| CACCGTTCTACTCGATCACTGAGTTAAGCGTTAACAGTCCGTATAGCG  | 2,15  |
| ACAGGCGGGTGCCTTGTAGTTCGTAAAGTGTGTGCCGGAGTAGACGTGC | 2,47  |
| TCAGAAACCGCTCAGCGTATTAGCACAGCTAAGCGGGCCGGGAAGGAC  | 4,15  |
| GTGGCTGGGCGGCCATATTTCCGCGTTCGGTCCAGCCGCGCGCAGGG   | 4,47  |
| CAGAGCCGCTAGCTAGAGGGAACGTGGGACGCACCAAGAAATAGCCAG  | 6,15  |
| TATGATTGCAGTCTCTGGGGTACCTAGAAATATCCTTCCAACATCTC   | 6,47  |
| AGCTTGGGCTGACAGACCAGGTCATTCCAGCTCCATATCCACCCTTTT  | 8,15  |
| AGATGTTCTTATGCTAGCGGAACCAGGAGAAA                  | 8,31  |
| CTTTACGCCAACCAAAAGGCATCACAGGTCAGGTAGCTCCGCCATTATA | 8,47  |
| CATCTTTTTCGAGATCTCTCCCCCTTGCTCCGAGGGTTATCAGCTA    | 8,63  |
| TTCTTAAACACCCCGACACTGACCCCGCAACAACAGCATGGCTTCAT   | 10,15 |
| CGTTTGTCTGCGATCAGTCCAACATGATAATC                  | 10,31 |
| GAGTCGGCAGGATATGTAGCCCGGCTCCCGGTGCATCAGATCGCGATC  | 10,47 |
| ATTACCGTGTGAACCTAACGATGTGGGAGGCTACCGCTACGCTTAC    | 10,63 |
| CGCACGGCGCCCTCGGGGCTGATGAAAAGGCGACATGAATACTCTGA   | 12,15 |
| CGAGTCGTTACGTCGTCATAGGTATTCATAACTCATCCGGTTACTTCG  | 12,31 |
| ATCGACTATCGTTCGAATGAACACCCCGCTGCGCACCGAAAAAAGCCC  | 12,47 |
| AGTTTCTGAAGCGTAAGATTGTAGCTGTGACCCATCTTTCCCCGTC    | 12,63 |
| CTAATATACCACCGCAGATACTTTGAGCCACTTAACCTGGCCATCCCT  | 14,15 |
| TTAGTGAGTGGGTAAGTCACATTAGATGTCCG                  | 14,31 |
| CCAAGTCAGAAGGAGTAAGTAAACTTGAGACTACCCGAGCGAGATGCG  | 14,47 |
| TCTTTCTCAACCTCGTGTGAACTGCTAAGCTGTTACGCTTAG        | 14,63 |
| TGGAGTTACTGTTTACGTCGCTGGGCTCGACA                  | 16,15 |
| GATAGCTGGTTTCCCTCACTTGAGGTTATGGA                  | 16,31 |
| AATTCTCATGAGCTTTGGTTCAGAAGAATATGGCCCCAAGCTAATCAC  | 16,63 |
| GTCGCATAGCGTATCCCCAGTGACCAAGGAG                   | 18,15 |
| GGCGCATAATCATGGTTCAGACGCTCGGGCAC                  | 18,31 |
| GAACCTGACGCGAGGCTATGCTGGATATCGCACGCGAGCTATGTAG    | 18,63 |
| TGACGATCTTCTGGTCTGTTATTTACAGGTAGAGCTTTAGGCGGGTCTG | 20,31 |
| GTATTACTGCCTGTTTCGGAAACAGTATCCCAACTCGACGGTTAATTTG | 20,63 |
| GACCATAGCCAAGGCAATAATAGTGGGGATGA                  | 22,15 |
| GGTACACGATATTAAGTGCCGAGGAGCTATGG                  | 22,31 |

|                                                    |       |
|----------------------------------------------------|-------|
| TAGGTTAACCCGAGCCAGGTGGCCTATTCGAAAAGACTGAGTTTGG     | 22,63 |
| ATCGGGTTGGGCACTCGTGCAGCTGCGCGCCT                   | 24,31 |
| TCACGTGGAATGCACAATCAGTTATGTTTAC                    | 24,47 |
| GTATAACCGAGGCGGCCCTACAATTATGTGAT                   | 26,31 |
| TTGCTTTACTTGACGACTCGTGCTTCGAGAAA                   | 26,47 |
| CGTGACAACCATACCCGGTGAGATFCCCCAG                    | 30,31 |
| ACAACATAATCCCTGACTTACATCGCCCCCTA                   | 30,47 |
| ATGTAGCAACGGCCACGAGGCGGGCTGTTC                     | 32,31 |
| GCAATTGCAGAACTGTAATTAGTACTGTTAG                    | 32,47 |
| AGTATAGTGCAACCTATCATAAGCAAGAACT                    | 34,31 |
| TCCAAACCAAGTGCATCCCACGTGTTGGTAA                    | 34,47 |
| TGCCCATGGTGACACGGACGAGGTGCCGATCT                   | 38,31 |
| GTCCCTCAAGCTTTATAAAGCAGGAGTACGAC                   | 38,47 |
| CTCGGCCCTACCCACAGGTACACCCATGAACCTAGGACCCTGCCAG     | 40,15 |
| AATGATTAGCCAGCGGCGTTAAAAGCACGCA                    | 40,31 |
| TAACTAAGGGAGCACTCAGGCTACATATCAAG                   | 40,47 |
| TATGGTTTCAGTAGAACGACCATGTGGGGCACCGAATCGCAGGAGATC   | 42,15 |
| TGGTGGTTGCCCTCAGACTCTCGTATCTTAGT                   | 42,31 |
| CAGCCCATGAGGATGTCGAATCAAAAATTGTG                   | 42,47 |
| CATATATTACGACTTTATGTGGTTTGGGTGTTTCAGAACTATGTACCG   | 44,15 |
| TACTAAAACGATCGCCAATAAGGAGACCAAGTCGAGATGTTCTCATAA   | 44,47 |
| TAGTTTGAGGGTATAGACTTTCTGTAAAGCCACGATTGCCGGCACTGCC  | 46,15 |
| CCGCACGTGCTGTATTGGCGATACGATGGCCG                   | 46,31 |
| GCGGCCATAGGAGAAGGAGTGCAACTAATCCC                   | 46,47 |
| AGAGTATATAAATGGTTTCCGCGTTGACTACC                   | 48,15 |
| GCTCGACCCCCCGCAGATGCTATATGTTGGGAGCACGTAGTTAATGC    | 48,31 |
| GAGGTAGCAGTGGAGCCCCGGTACAAATCTGTTTTGTCCCATTACG     | 48,47 |
| TCTGGTTCGCGTATCGAGTACTGTGTGCGAAAAGCAGGTCTAGTGTG    | 48,63 |
| ACTTGGGACCCACTGTCTTAAATCCTATGA                     | 50,15 |
| TAGTCCACTTACTTGCTAAGCGCGCACCCGTTCACTCGCACTTAGATC   | 50,31 |
| AGCCTACGGCGCTTTCGGCGGTACCAAAACATTGGAATGCAACACCGGC  | 50,47 |
| TTGGCTGAACCGCTCTGCCTGGCCCTACTTCAACTTACGTTTACTTGG   | 50,63 |
| TCTTGCTTTCGCTGCAAGCTCTGTTCACTTGCACATGTAATCTAGCAG   | 52,15 |
| CCACATGATAGGTTTCCGTACGCATACGATTTACGGGGTTACTCTAGC   | 52,31 |
| CTCGTTTCGTTAGGATCATCTGGTCATTGAAAGGTGTCAAGGGAAAGTTC | 52,47 |
| GTAACGAAGGACGATAGAACCGGTCACCGAATACTTGAATAAAAAGC    | 52,63 |
| TCAAGCTGGGTGCTACACTGTACGATCCGAAT                   | 54,15 |
| TCGCAACGGTCTTGCAGCTACGCTGGACTCATTTCGTACAGCGACATCC  | 54,31 |
| GGTAGGTTGCGAAAATCGCCCACTTCCGCCCCTAATGAAGGTTGGTT    | 54,47 |
| CGGCATGCGCTTAGGGTGCTGGTAAAAGATACTGTACTACTAACCTT    | 54,63 |
| TCAAGGCCCGCAGCAAACGGCGACATCGCCGTGATTAGCGGTCTAAA    | 56,31 |
| CCATGAAATTGGACGGGTGGGAGAATGTCATGTATTTGACTCTGCAAC   | 56,63 |
| ACGACTCTCCGCCGAGGAACTTGTGTAATGCGTCGTCTATGCCAGC     | 58,31 |
| CGGGGAGGTGTCAAGTTGTGGGCTGGGGCATACCCCAAGTGTACATG    | 58,63 |
| AATTCATCGTCCGGTCTACGCTATGGCTAGAATGGATATCCACCTTTC   | 60,31 |
| AAAGCTTCCATCTGATCCAGTCCCCGAACGATTCCTTTTAGGTCTAC    | 60,63 |
| CGTCACTTTCGCGTCGTACATACGTCCAGAATCCTACTCTATACAAA    | 62,31 |
| GCAGTCCGGTCTCACGCGCCAGAGCTGAGGAGCCACTACGATATTC     | 62,63 |

## S1.9 Z-108H×32B-tunnel crystal sequences

|                                                    |        |
|----------------------------------------------------|--------|
| CCAGGTAAAGTGGCTCAATCATACTCACGGTAACTGTTGTGTCCTAT    | 1,23   |
| GTTTACTTAGGGATGGTACGAACTCAACGCAC                   | 1,39   |
| GCTCGGTAGTCTCAAGAAGATAGAGAGCATA                    | 3,23   |
| AATTCGTAAACCGGAAAAAGTATCCGCATCTC                   | 3,39   |
| ACTCAGTGATCGAGTATTCATGTCGCCTTTC                    | 5,23   |
| GAACGGTGACACACTTGTGTTTCATTCAGAGTA                  | 5,39   |
| GCGGAAATATGGCCGCTTCGGTGCAGCGGG                     | 7,23   |
| CCGCTGTAACGCTTAATCAGCCCGGGCTTT                     | 7,39   |
| GCTAATACGCTGAGCGATGCTGTTGTTGCGGG                   | 9,23   |
| GTTTCTGAACCGGAACCCGGGCTAATGAAGCC                   | 9,39   |
| GTGACCCAGAGACTGTCTGATGCACCGGGAGCCAGCCACTTAGCTGT    | 11,39  |
| GTCAGTGTGATCGCGAGTTCCCTCTAGCTAGG                   | 13,23  |
| GTGATGCCAAAAGGGTGGATATGGAGCTGGAACGGCTCTGATTTCTAG   | 13,39  |
| TGACCTGGTATAATGGCGGAGCTACCTGACCT                   | 15,23  |
| CAATCATACGTCCCACGGAAGGATTCATCCCC                   | 15,39  |
| TTAAGAATGATCGCACAGTCTTTGAGATGTT                    | 17,23  |
| GAACATCTTTTGGTTGGCGTAAAGATCTCGCA                   | 17,39  |
| TTCTGGTGCCAAAAGTCCGACTCGTTCAAGC                    | 19,23  |
| ACTATTATCTGGCTATAAAAGATGTCTGTCAG                   | 19,39  |
| CCCAAGCTTAGCATAAGCGGGCTGGACGACCCC                  | 21,23  |
| GCCGTGCGACGACTGACCGTCGAGCCCTGCGC                   | 21,39  |
| GACAAAACGCATATCTCGGCCCGCAAATTAATAGTCGATTACGCTTC    | 23,23  |
| GCCTAAAGGTCCTTCCACGGTAATCGGGGGTACTCCGGCCTCCTTGG    | 25,23  |
| TATATTAGCTTACCCACTCGCGTGGCACGTCT                   | 25,39  |
| ACGACTCGTCGAACGAGGACTGTTCTACATAG                   | 27,23  |
| TGACTTGGACGAGGTTTCACTGGGCGCTATAC                   | 27,39  |
| AGGAAACTCGAGGGGCTCCCTGTCTGTGAGC                    | 29,23  |
| CCAGCGACCACTTCTGGAGAAAGATGCGGTGG                   | 29,39  |
| CAGTAGTTGTGATTAGCTTGGGGGTGATATAC                   | 31,23  |
| CTCACTAAACTCCTTCTAATGTGACTAAGCGT                   | 31,39  |
| TAACTCCAAAGGAAACCAGCTATCCATATTC                    | 33,23  |
| GATGTAAGCGGACATCTATGCGCCCGATATCC                   | 33,39  |
| GTTCAAAGTGGGGGCTTCTGACCAAAGCTCATGAGAATTGTAAACAG    | 35,39  |
| GAACAGCTTAGAGCAGTCAAGTTCGGATACGCTACCTATGGACGGGGA   | 37,23  |
| TATGCGACACCATGATCCGGATGAGTTATGAAGATCGTCATTGGGATA   | 37,39  |
| TACAACTCGAAGTAAAGCATAGCACCTGCGAAGATAGGGTCAACAGC    | 45,39  |
| AGTAATACCTTACCTTGTGGACGTAAGCGTGAAATAACGACCAGAA     | 47,23  |
| AGCACGAGGATTATACGTGTACCTCGAAATAATCGTTAGTTTCTCGA    | 49,23  |
| CTGTTCCGAAACAGGCAGCGGTAGCCTCCCACTTAACTATGCCTTGG    | 49,39  |
| TAAGTATTTCTCTGGTTCCGCTAGCTGATCTATGGTCCTTAATAT      | 57,23  |
| AACCCTCGGAGGCAAGGGGAGAGGGTGAAACAGGCCACCTGGCTCGGG   | 59,39  |
| GAGTGCCCCCTCGGCAGCCGCTCGGTTATACTCGTCAAGCCTGCTTT    | 61,23  |
| CCATAGCTAACCAGATTGTGATTCCACGTGAGTCGACTTAAAGCAA     | 61,39  |
| ACGTGGGAGTGCCCGAGCGTCTGAGGTATGGTTTACCCACTATGTTGT   | 69,39  |
| CTCAAGTGCTAACAGTACTAATATTCATAACTGTGCACGTACGGGAT    | 71,23  |
| TCTACCGGTGGCCGTTGCTACATCAGTTTCTTTGCACTCCTGGGGAA    | 73,23  |
| ACTATACTTACGCACTGGTTTGGAGGGATTAGGCAATTGCTAGGTTGC   | 73,39  |
| ATTGTAGGCACAATTTTGTATCGATCACATACATGGGCAATAAAGCT    | 81,23  |
| GTAGCCTGAGGGCGCAGCTGCACCGTGTACCTTGATATTGAGGGAC     | 83,39  |
| ACCTCGTCAATTCGGATAAAACCATACTGAGGGCAGTGGGCGAGATCGGC | 85,23  |
| TAATCATTAGTGCTCCCTTAGTTAGTTTCATAGTTTCATTAGGGGCGGAA | 85,39  |
| ATGGGCTGGTGCCCCACGTACAGTAACCAACCGGTGACCTGTGGGTA    | 93,39  |
| GGGCGAGCGCTGGGCTTACATGTGCAAGTGAATATATGACTTGGTC     | 95,23  |
| GACCAGATCTGTAGAAAACCAACATCCTCCTTGACACCTTTCAAT      | 97,23  |
| TTTTAGTAAACACCCAACAGAGCTGAACTTCCCATGGTCGTTCTACTG   | 97,39  |
| TCGTATGATCATAGGATCAAATAAATACAGCGTACCGCCAGTTCTTG    | 105,23 |
| TCCTATTGGCGATCGTGCATTCCAATGTTGATGGCCGCTGGCTTA      | 107,39 |
| TTAAGACGGCCGGTGAACCAATAAAAGTCGT                    | 109,23 |
| CCGCTCCGGTAGTCAACCGGAACGTAATGGCAGAAAGTCTATACCC     | 109,39 |
| GACAAAAACAGATTTGTACCGGGGTGAACAGC                   | 111,23 |
| ACGTGCGGCTTCTCCTGTATCGCCTTGTGTAT                   | 111,39 |
| TATACTCTTGGGGGGGGTTCGAGCGCTCCACT                   | 113,23 |
| GTAGTGGCCGGCCATCGTGGACTAGAAAAGCGC                  | 113,39 |
| CGGCAATCTGAATATCGCTACCTCCGATACGC                   | 115,23 |
| GAACCAGAACCATTTAAGAGTAGGGGCAGTGC                   | 115,39 |
| TCAGCCAAAACAGTGGGACATCTCGGAAAGGTG                  | 117,23 |

|                                                   |        |
|---------------------------------------------------|--------|
| TCCAAGTGCAAGTAAAAAAGGAATTATGAGA                   | 117,39 |
| TCATGTGGGATCCTAAAGTTTCTGGTAGACCTCGTAGGCTAGAGCGGT  | 119,23 |
| GATATCCACGGTACATTTCGTTTACTGCACGGAACGAGAGTGCTGGCAT | 121,23 |
| AAGCAAGAGAAAACCTAACTTGGGGACTAAGAT                 | 121,39 |
| CGTTGCGAATTTTCGCGCATTCGCATGTAGC                   | 123,23 |
| CGAACGAGATCGTCCTAGACGACGGATCTCCT                  | 123,39 |
| GCATGCCGGTAGCACCGTCAAATATGCGTGCT                  | 125,23 |
| TTTAACGCTTTAGACCCAGCTTGACGCAAGAC                  | 125,39 |
| GCTAATCACTGGGCAGGGTCTAGGTTGCAGA                   | 127,23 |
| AACCTACCCCTAAGCAGCGTAGTAAGGGTTA                   | 127,39 |
| CAAGTTCTGCGGCGGCTGTACGAATGAGTCC                   | 129,23 |
| GGCCTTGACATGACATTCTCCACCCGTCCAA                   | 129,39 |
| CACCAGCAGGATGTCGAGCCCACAACCTTGACAGTAGTACAGTATCTTT | 131,39 |
| TTTCATGGCGGCGATGTCGCCGTTTGTCTGCG                  | 133,23 |
| TGCGTACGGCTTTTATATAGCGTAGACCGGACAACCCCGTAAATCGTA  | 133,39 |
| AGAGTCGTTATGCCCCCGGTTCTGCTAGAGT                   | 135,23 |
| GGGACTGGATCAGATGTTCAAGTATTCGGTGA                  | 135,39 |
| CCTCCCGCATTAACAACGCGTTACCAAGTAA                   | 137,23 |
| CGTATGTACGACGCGATGCGAGTGAACGGGTG                  | 137,39 |
| GATGAATTCGTTTCGGGGCCAGGCGATCTAAG                  | 139,23 |
| TCTGGCGCGTGAGGACACGTAAGTTGAAGTAG                  | 139,39 |
| GAAGCTTTTTCTAGCCATAGCATCGACACTAC                  | 141,23 |
| GACCTGCTTTTTCGACACGGACTGCATTCTGGA                 | 141,39 |
| CAGTAACTGCATTAACCTACGTCTCCCAACATAAGTGACGTCCTCAGC  | 143,23 |
| GTATGATTATAGGACACAACAGTTAACCGTGACGTTTGTCTTAATTTG  | 0,15   |
| CTATCTTCGTGCGTTGAGTTTCGTATATGCTCTAGCTTGGGTCAGTCGT | 2,15   |
| GACATGAAGAGATGCGGATACTTTGAAAAGGCCACCAGAAATAGCCAG  | 4,15   |
| GCACCGAATACTCTGAATGAACACCCCGCTGCTTCTTAAACAACCAAA  | 6,15   |
| AACAGCATAAAAAGCCCGGCTGATCCCGCAACCCAGGTCAGTGGGACG  | 8,15   |
| GTGGCTGGGGCTTCATTAGCCCGGACAGCTAAACACTGACACCCTTT   | 10,15  |
| CAGAGCCGTTCCAGCTGGGGTCACCTCCCGGTGCATCAGACAGTCTCT  | 12,15  |
| CCATATCCCTAGAAATGGTCAGAAGCCCCCTA                  | 12,31  |
| GAGGGAACGGGATGATCAGAAACCGCTCAGCGTATTAGCGTTCCGGT   | 14,15  |
| ATCCTTCCCCTAGCTATGGAGTTAGATGTCCG                  | 14,31  |
| TAGCTCCGTGCGAGATACAGGCGGGCGGCCATATTTCCGCTAAGCGTT  | 16,15  |
| CTTACGCAAGTACAGAACTACTGGAAGGAGTTTAGTGAGTAATCAC    | 16,31  |
| AAAGACTGCTGACAGACACCGTTCTACTCGATCACTGAGTAAGTGTGT  | 18,15  |
| CATCTTTAACATCTCAGTTTCTCAGAAGTGGTCGCTGGGCCCTCG     | 18,31  |
| GAGTCGGCGCGCAGGGAGCGAATTTTGAGACTACCCGAGCTCCGGTTT  | 20,15  |
| CTCGACGGGCTTGAACCGAGTCGTAACCTCGTCCAAGTCATCGTTCTGA | 20,31  |
| CCAGCCGGAAGCGTAAAGTAAACGAGCCACTTAACTGGCCATCCCT    | 22,15  |
| ATCGACTAGGGGTCGCTTTTAGGCTGGGTAAG                  | 22,31  |
| ATTACCGTCCAAGGAGGCGGGCCGAGGATATG                  | 24,15  |
| GCCGGAGTACCCCGGTATTACTACGCTTAC                    | 24,31  |
| AACAGTCCAGACGTGCCGACGGCTTATGCTA                   | 26,15  |
| CACGCGAGCTATGTAGGCTATGCTTTACTTCG                  | 26,31  |
| CCCAGTGAGCTCGACAGACAGGGAGTATAGCGATAATAGTAGTTTTGG  | 28,31  |
| TCTTCTCGTATATACCCCAAGCCACCGCAAGATGTTCTGCGATCA     | 30,31  |
| TCACATTAGAATATGGGATAGCTGACGCTTAGTATGATTGCCATTATA  | 32,31  |
| AATTCTCAGGATATCGGGATCACTCGCGATC                   | 34,15  |
| GGCGATACTGTTTACAGCTGTTTCATCATGGT                  | 34,31  |
| TGACGATCTTCATAACGTTTGAACGAGCTTT                   | 36,15  |
| TCATCCGGTATCCCAACCTCTCCCTTGCCCTC                  | 36,31  |
| GAACCTGATCCCGTCTTACATCGTTTCTTT                    | 38,15  |
| CATAGGTAGCGTATCCATCAGTTAATCAGCTA                  | 38,31  |
| CCTATCTTTTCTGGTCTAATATAGGAAGGAC                   | 46,15  |
| GTTATTTCTGCTGTGACCTCGTGTGCTGCTGTTT                | 46,31  |
| GGTACACGTCGAGAAAGTCCAACAAGGTAGAG                  | 48,15  |
| CTAACGATTATTTGACACTTGAGGTTATGGA                   | 48,31  |
| TAGGTAAAGTGGGAGGAGATTGTACGCAAGGT                  | 50,15  |
| CTACCGCTCCAAGGCATCAGACGCTCGGGCAC                  | 50,31  |
| AGGTGGCCATATTAAGGTCGCATACTGCTCTA                  | 58,15  |
| GACCATAGCCCAGCCGGGCACTCATCGGGTT                   | 58,31  |
| AGTACGACTCACGTGGCGAGGGTTTGTTCAC                   | 60,15  |
| AATGCACATTGCTTTAGTGCAGCTGCGCGCCT                  | 60,31  |
| GAGGCGGCAAAGCAGGGCGGAACCAGGAGAAA                  | 62,15  |
| CTTGACGAGTATAACCCCTACAATTATGTGAT                  | 62,31  |
| GTGGGTAAATCCCTGACGGAACAGTGATAATC                  | 70,15  |

|                                                    |        |
|----------------------------------------------------|--------|
| CGTGCAACAACATACGGTGAGAAGTGCCTA                     | 70,31  |
| ATGTAGCAITCCCCAGTAATTAGTACTGTTAG                   | 72,15  |
| GAGTGCAAAGAACTGCTCGGCCCTCACTGC                     | 72,31  |
| GCAATTGCCTAATCCCTCCCACGTACCATACC                   | 74,15  |
| TCCAAACCGCAACCTAACTGTACGTGGGGCAC                   | 74,31  |
| ATATCAAGAGCTTATAGCTATGGTGCCGAGG                    | 82,15  |
| TGCCCATGGTCCCTCAGACGAGGTGGAGCACT                   | 82,31  |
| CTAATGAACCTATGAACCAGGCTACGTGACACG                  | 84,15  |
| TAACTAAGTTCCGCCCGGAATGCACGATCGCC                   | 84,31  |
| TATGGTTTGCCGATCTCGAATCAAAAATTGTG                   | 86,15  |
| CGCCCACTGCCCTCAGTCATACGAGCTGTATT                   | 86,31  |
| GGTACACCGACCAAGTAGTATAGTACGGCCAC                   | 94,15  |
| CATATATTACCCACAATCTGGTCTGGGTGTT                    | 94,31  |
| TGGTGGTTATTGAAAAGACATGTAAGCCAGCG                   | 96,15  |
| GTGTCAAGGAGGATGTCCACATGAAGGTCTAC                   | 96,31  |
| CGACCATGGGAAGTTCAGCCCATGGTTGGTT                    | 98,15  |
| AGCTCTGTCAAGTAGAATTGGCTGATTACTTGC                  | 98,31  |
| GCGGCCATCAAGAACTAATGATTAATCCGAAT                   | 106,15 |
| GGCGGTACTAAGCCACCGTCTTAATGACTACC                   | 106,31 |
| ACTTCTGCCATTACGAATAAGGACAAAACATT                   | 108,15 |
| TCCCGCTGGGTATAGTGTGGGCTCGACATCC                    | 108,31 |
| ATGTGGTTATACACAATAGTTTGATCTATGA                    | 110,15 |
| GGCGATACACGACTTGGAACCTGATGTCATG                    | 110,31 |
| CCCCGGTAGCGCTTCTAGTCCACGCTGTTTCATGATTAGCGCTTAGGG   | 112,15 |
| GCTCGACCGCACTGCCCTACTCTAGTGGAGCCGGCATGCGGTCTAAA    | 114,15 |
| GAGGTAGCTCTCATAATTCCTTTTGGTATCGTCGCAACGAGGACGAT    | 116,15 |
| CGAGATGTACCGCTCTTACTAAAATCTAGCAG                   | 118,15 |
| AGCCTACGCACCTTCTGGATATCTAGGTTTC                    | 118,31 |
| GTAAACGAATGCCAGCCAGAACTTTAGGATC                    | 120,15 |
| ACTCTCGTTCGGTGCAAGTTACTGATGTTGGGAGCACGTAGTTAATGC   | 120,31 |
| CGAATCGCATCTTAGTACTTGGGACCCACTGT                   | 122,15 |
| CCCCAAGTGCTACATGAAAAGCTTCTGTGCGAAAAGCAGGTGCGCTAGAA | 122,31 |
| TATTTGACAGGAGATCTCTGGTTCGATATTCAGATTGCCGTAATGGT    | 124,15 |
| CGTCGTCTAGCACGCAAATTCATCGTCCTACGCGCCAGACCGAACGA    | 124,31 |
| CTAGGACCGTCTTGGCGCCACTACCCCGCAAGAGTATAGATGGCCG     | 126,15 |
| TCAAGCTGTCTGCAACCGGGGAGGTGCGGTGTCATACGTTGTAATG     | 126,31 |
| TCGTACAGTAAACCCTCCGCACGTCAAATCTGTTTTTGTACAGGAGAAG  | 128,15 |
| ACTACGCTGGACTCATACTCTCATCTGATCCAGTCCCGGGGCATA      | 128,31 |
| TGTACTACTTGGACGGGGAGGCGGACACCGGC                   | 130,15 |
| GTGGGAGAAAAGATACCCATGAAAATAAAAAGCCGTACGCACATCGCCG  | 130,31 |
| TACGCTATTACGATTTACGGGGTTGTCCGGTCTGCTGGTGTGTC AAGT  | 132,31 |
| TACTTGAACGCGAGCAAACGGCGATCACCGAATCAAGGCCCGCCGCA    | 134,31 |
| CACTCGCAACTCTAGCAGAACCAGCCGTTGGTAGGTTCTGCCCGAG     | 136,31 |
| ACTTACGTTTACTTGGTAAGCGCGCTACTTCAGCGTTAAAGGTGCTAC   | 138,31 |
| GCAGTCCGCTTAGATCGCCTGGCCTCCAGAATCTCGTTCGGCGAAAAT   | 140,31 |
| CGTCACTTGTAGTGTGATGCTATGCTGAGGATCTTGCTTATGTACCG    | 142,31 |

## S2.1 X-6H×6H×64B-cuboid crystal sequences

|                                   |       |
|-----------------------------------|-------|
| CCAGGTTAAGTGGCTCAATCATACTCACGGTT  | 1,31  |
| AACTGTTGTGTCTATGTTTACTTAGGGATGG   | 1,47  |
| TACGAACTCAACGCACGCTCGGGTAGTCTCAA  | 1,63  |
| GAAGATAGAGAGCATAAATTCGCTAAAACCGGA | 1,79  |
| AAAGTATCCGCATCTCACTCAGTGATCGAGTA  | 3,31  |
| TTCATGTCGCCTTTTCGAACGGTGACACACTT  | 3,47  |
| GTGTTCAATCAGAGTAGCGGAAATATGGCCGC  | 3,63  |
| TTCGGTGCAGCAGCGGGCCGCTGTAACGCTTA  | 3,79  |
| ATCAGCCCGGGCTTTTGCTAATACGCTGAGCG  | 5,31  |
| ATGCTGTTGTTGCGGGGTTTCTGAACCGGAAC  | 5,47  |
| CCGGGCTAATGAAGCCGTGACCCAGAGACTG   | 5,63  |
| TCTGATGCACCGGGAGCCAGCCACTTAGCTGT  | 5,79  |
| GTCAGTGTGATCGCGAGTTCCTCTAGCTAGG   | 7,31  |
| GTGATGCCAAAAGGGTGGATATGGAGCTGGAA  | 7,47  |
| CGGCTCTGATTCTAGTGACCTGGTATAATGG   | 7,63  |
| CGGAGCTACCTGACCTCAATCATACTGCCAC   | 7,79  |
| GGAAGGATTCATCCCTTAAAGATGATCGCA    | 9,31  |
| CAGTCTTTGAGATGTTGAACATCTTTTGGTTG  | 9,47  |
| GCGTAAAGATCTCGCATTCTGGTGCCAAAAC   | 9,63  |
| GCCGACTCGTTCAAGCACTATATCTGGCTAT   | 9,79  |
| AAAAGATGTCTGTCAGCCAAGCTTAGCATAA   | 11,31 |
| GCGGCTGGACGACCCCGCGTGCAGCAGCTGA   | 11,47 |
| CCGTCGAGCCCTGCGCGACAAAACGCATATCCT | 11,63 |
| CGGCCCGCCAAATTAATAGTCGATTACGCTTC  | 11,79 |
| GCCTAAAAGTCTTCCACGGTAATCGGGGGTG   | 13,31 |
| ACTCCGGCCTCCTGGTATATTAGCTTACCCA   | 13,47 |
| CTCGCGTGGCACGCTACGACTCGTCGAACGA   | 13,63 |
| GGACTGTTCTACATAGTACTGGACGAGGTT    | 13,79 |
| TACTGGGCGCTATACAGGAAACTCGAGGGGC   | 15,31 |
| TCCCTGTCTGTCGAGCCAGCGACCACTTCTG   | 15,47 |
| GAGAAAGATGCGGTGGCAGTAGTTGTGATTAG  | 15,63 |
| CTTGGGGGTGATATACCTCACTAAACTCCTTC  | 15,79 |
| TAATGTGACTAAGCGTAACTCCAAAGGAAAC   | 17,31 |
| CAGCTATCCCATATTTCGATGTAAGCGGACATC | 17,47 |
| TATGCGCCGATATCCGTTCAAACCTAGGGGGC  | 17,63 |
| TTCTGACCAAAGCTCATGAGAATTGTAAACAG  | 17,79 |
| GAACAGCTTAGAGCAGTCAAGTTCGGATACGC  | 19,31 |
| TACCTATGGACGGGATATGCGACACCATGAT   | 19,47 |
| CCGGATGAGTTATGAAAGATCGTCATTGGGATA | 19,63 |
| TACAATCTCGAAGTAAAGCATAGCACCTGCG   | 19,79 |
| AAGATAGGGTCACAGCAGTAATACCTTACCT   | 21,31 |
| TGTTGGACGTAAGCGTGAAATAACGACCAGAA  | 21,47 |
| AGCACGAGGATTATCACGTGTACCTCGAAATA  | 21,63 |
| ATCGTTAGTTTCTCGACTGTTCCGAAACAGGC  | 21,79 |
| AGCGGTAGCCTCCCACTTAACCTATGCCTTGG  | 23,31 |
| TAACTGATTTTCTCCTGGTTCCGCTAGCTGAT  | 23,47 |
| CTATGGTCTTAATATAACCCTCGGAGGCAAG   | 23,63 |
| GGGAGAGGGTGAAACAGGCCACCTGGCTCGGG  | 23,79 |
| GAGTGCCCCCTCGGCAGCCGCTCGGTTATAC   | 25,31 |
| TCGTCAAGCCTGCTTCCATAGCTAACCCGAT   | 25,47 |
| TGTGCATTCCACGTGAGTCGTACTTAAAGCAA  | 25,63 |
| ACGTGGGAGTGCCCGAGCGTCTGAGGTATGGT  | 25,79 |
| TTACCCACTATGTTGTCTCAAGTGCTAACAGT  | 27,31 |
| ACTAATTATCCATAACTGTGCACGTCAGGGAT  | 27,47 |
| TCTCACCGGTGGCCGTTGCTACATCAGTTTCT  | 27,63 |
| TTGCACTCCTGGGGAAACTATACTTACGCACT  | 27,79 |
| GGTTTGGAGGGATTAGGCAATTGCTAGGTTGC  | 29,31 |
| ATTGTAGGCACAATTTTGTGATTCGATCATA   | 29,47 |
| CATGGGCAATAAAGCTGTAGCCTGAGGCGCGC  | 29,63 |
| AGCTGCACCGTGTACCTTGATATTGAGGGAC   | 29,79 |
| ACCTCGTCATTCCGATAAACCATACTGAGGGC  | 31,31 |
| AGTGGGCGAGATCGGCTAATCATTAGTGCTCC  | 31,47 |
| CTTAGTTAGTTCATAGTTCATTAGGGGCGGAA  | 31,63 |
| ATGGGCTGGTGCCCCACGTACAGTAACCAACC  | 31,79 |
| GGTGTACCTGTGGGTAGGGCCGAGCGCTGGGC  | 33,31 |
| TTACATGTGCAAGTGAAATATATGACTTGGTC  | 33,47 |



|                                                   |       |
|---------------------------------------------------|-------|
| GACCAGATCTGCTAGAAACCACCAACATCCTC                  | 33,63 |
| CTTGACACCTTTCAATTTTTAGTAAACACCCA                  | 33,79 |
| ACAGAGCTGAACTTCCCATGGTCTTCTACTG                   | 35,31 |
| TCGTATGATCATAGGATCAAATAAATACAGC                   | 35,47 |
| GTACCGCCAGTTCTTGTCTTATTGGCGATCG                   | 35,63 |
| TGCATCCAATGTTTGATGCCCCTGGCTTA                     | 35,79 |
| GTATGATTTTTTTTTT                                  | 0,23  |
| ACCCGAGCGTTCGGTTCAGAAACAACCGTGACATCTTTGGGGTCGT    | 0,55  |
| TTTTTTTTACAGCTAAGTGCTGTTGAGACTCTCGACGGTTAATTG     | 0,87  |
| CACTGAGTTTTTTTTT                                  | 2,23  |
| ATTCCGCCATCCCTAAGTAAACTACTCGATATCCTTCCAACATCTC    | 2,55  |
| TTTTTTTTCCGGTTTAGCGAATTGCGGCCATCTTACGCGTTGAAC     | 2,87  |
| GTATTAGCTTTTTTTTT                                 | 4,23  |
| GGGGTCACAAGTGTGTACCGTTCGGCTCAGCACACTGACACCTTTT    | 4,55  |
| TTTTTTTTTAAGCGTTACAGGCGGCAGTCTCTCAGAGCCGAGGTCAGG  | 4,87  |
| AGCTTGGGTTTTTTTTTTTTTTTTTAAAGCCCGGGCTGATCCCGCAAC  | 6,23  |
| CCATATCCTTATGCTATCACATTAGAATATGG                  | 6,39  |
| CGTTTGTCTTCCAGCTAACAGCATGGCTTATTAGCCCGGCTCCCGGT   | 6,55  |
| TATGATTGAGGATATGGGCGCATATGAGCTTT                  | 6,71  |
| TTTTTTTTGTGGGACGGCATCAGATTTTTTTTT                 | 6,87  |
| GAGGGAACTTTTTTTTTTTTTTTGGAGATGCGGATACTTTGAAAAGGC  | 8,23  |
| AGATGTFCCCTAGCTACCCAGTGAGCTCGACA                  | 8,39  |
| CCAGGTCACAACCAAAGACATGAATACTCTGAATGAACACCCCGCTGC  | 8,55  |
| ATAATAGTCCATTATATCTTCTCGTATATCA                   | 8,71  |
| TTTTTTTTATAGCCAGGACCCGAATTTTTTTTT                 | 8,87  |
| TTCTTAAATTTTTTTTTTTTTTTTGGAGCCACTTAACCTGGATAGGACA | 10,23 |
| CGCACGGCTGCGATCACTTTAGGCCCAAGGAG                  | 10,39 |
| CACCAGAATCAGTCGTCAACAGTTGTGCGTTGAGTTCGTATATGCTCT  | 10,55 |
| ATCGACTAAGTTTTGGCACGCGAGCTATGTAG                  | 10,71 |
| TTTTTTTTGAAGCGTACTATCTTCTTTTTTTTT                 | 10,87 |
| ATTACCGTTTTTTTTTTTTTTTTTCTGACAGA                  | 12,23 |
| CTTACATCCACCCCGCTACCGCTAGGAGAAA                   | 12,39 |
| CGAGTCGTGATGTCGCCAGCCGCGCGCAGGG                   | 12,55 |
| AATTCTCATCGTTCGAGACCATAGTGTTTAC                   | 12,71 |
| TTTTTTTTCTGTTTACGCGGGCCGTTTTTTTT                  | 12,87 |
| AGTTTCCTTTTTTTTTTTTTTTTTTGGGGATGA                 | 14,23 |
| CTAATATAGCCCCTCGCCTATCTTACGCTTAC                  | 14,39 |
| AACTACTGTGGGTAAGAAAGACTGTGCGAGAT                  | 14,55 |
| CCAAGTCACTAATCACCTCGTGTTCGAGAAA                   | 14,71 |
| TTTTTTTTAACCTCGTGAGTCGGCTTTTTTTTT                 | 14,87 |
| TGGAGTTATTTTTTTTTTTTTTTTTTCGCGATC                 | 16,23 |
| GTCGCTGGGTTTCCCTTAGCTGTTCTCCCGTC                  | 16,39 |
| GTTTGAACCAGAAGTGGGCATCACCTAGAAAT                  | 16,55 |
| TTAGTGAGGCCCCCTATCATCCGGTTACTTCG                  | 16,71 |
| TTTTTTTTGAAGGAGTTAGCTCCGTTTTTTTT                  | 16,87 |
| TAGGTAAATTTTTTTTTTTTTTTTTTACGCTTAG                | 18,23 |
| GTCGCATACCAAGGCATCCAAACCAAATTGTG                  | 18,39 |
| CGAGGGTTATCATGGTGATAGCTGGGATATCG                  | 18,55 |
| GCTATGCTCTTGCCCTGCCCATGGTGACACG                   | 18,71 |
| TTTTTTTTCGCAGGGTGGTCAGAAATTTTTTTTT                | 18,87 |
| GAAC TTGATTTTTTTTTTTTTTTTTTGTATAGCG               | 20,23 |
| GTTATTTCCGCTATCCGTGGGTAAGTTATGGA                  | 20,39 |
| TGACGATCTTCTGGTTCGACAGGGACCACCGCA                 | 20,55 |
| CGGAACAGTATCCCAACGGTGAGATTCCCCAG                  | 20,71 |
| TTTTTTTTGCCTGTTTCCCCCAAGTTTTTTTT                  | 20,87 |
| GTATTACTTTTTTTTTTTTTTTTTTGGAAAGGAC                | 22,23 |
| GCGGAACCAGGTAGAGGGGCACTCAAAGCAGG                  | 22,39 |
| GGTACACGATCAGCTAGCCGGAGTAGACGTGC                  | 22,55 |
| AGGTGGCCTATTTGAAATGCACATCGGGCAC                   | 22,71 |
| TTTTTTTTCCCGAGCCAACAGTCCTTTTTTTT                  | 22,87 |
| GAGGCGGCTTTTTTTTTTTTTTTTTTGTGGGAGG                | 24,23 |
| CGAATCAAGTATAACCAGCTCTGTTCTATGATCATAAGAACT        | 24,39 |
| AGTACGACTATGTGATATCAGTTAATAATTAAG                 | 24,55 |
| ATATCAAGTTGCTTTAGGCGGTACCAAACATTGGAATGCATTTTTTTTT | 24,71 |
| TTTTTTTTGTCCCTCACCTCTCCCTTTTTTTTT                 | 24,87 |
| CACTTGAGTTTTTTTTTTTTTTTTTGTCTGTGAC                | 26,23 |
| AGCTATGACTGTTAGGGTACACCTCACTTGACATGTAATCTAGCAG    | 26,39 |
| ATGTAGCAATCGGGTTGTCCAACATGATAATC                  | 26,55 |

|                                                  |       |
|--------------------------------------------------|-------|
| TCAGACGCAGAACTGATCTGGTCATTGAAAGGTGTCAAGTTTTTTT   | 26,71 |
| TTTTTTTACCATAACCTAACGATTTTTTTTT                  | 26,87 |
| GCAATTGCTTTTTTTTTTTTTTTCTGCTCTA                  | 28,23 |
| CGTGCACAGCAACCTAGACGAGGTGCCGATCTCGCCCACTCTATGAAC | 28,39 |
| CAGGCTACATCCCTGACATAGGTATTCATAAC                 | 28,55 |
| AGTATAGTGC GCGCCTTAAGTAAGTGGGGCACCAGCCATTTTTTTT  | 28,71 |
| TTTTTTTAGTGC GTAAGATTGTATTTTTTTT                 | 28,87 |
| AATGATTACAGTAGAACGACCATGTTTTTTTTTTTTTTCTAATCCC   | 30,39 |
| ACTGTACGCGATCGCCAATAAGGAGGAGCACTCTACAATAGCTTTAT  | 30,71 |
| TTTTTTTGGTTGGTTGTGCAGCTTTTTTTTT                  | 30,87 |
| TTTTTTTATCCGAAT                                  | 31,8  |
| CATATATTGCCCTCAGTATGGTTTTTTTTTTTTTTTTTACAACATA   | 32,39 |
| TACTAAAATTCCGCCCCTAATGAAGACCAAGTTAATTAGTACGGCCAC | 32,71 |
| TTTTTTTTGGGTGTTGAGTGCAATTTTTTTTT                 | 32,87 |
| TTTTTTTTACCCACA                                  | 33,8  |
| TAGTTTGAGCCAGCGCTCGGCCCTTTTTTTTTTTTTTTGCCGAGG    | 34,39 |
| GCGCCATGAGGATGTTGGTGGTTGCTGTATTCTTGACGATCACGTGG  | 34,71 |
| TTTTTTTTAAGCCACTCCACGTTTTTTTTT                   | 34,87 |
| TTTTTTTTGGAAGTTC                                 | 35,8  |

## S2.2 X-32H×64B-pore crystal sequences

|                                                   |       |
|---------------------------------------------------|-------|
| CCAGGTAAAGTGGCTCAATCATACTCACGGTT                  | 1,31  |
| AACTGTTGTGCCTATGTTACTTAGGGATGG                    | 1,47  |
| TACGAACTCAACGCACGCTCGGGTAGTCTCAA                  | 1,63  |
| GAAGATAGAGAGCATAAAATTCGCTAAACCGGA                 | 1,79  |
| AAAGTATCCGCATCTCACTCAGTGATCGAGTA                  | 3,31  |
| TTCATGTCGCCTTTTCGAACGGTGACACACTT                  | 3,47  |
| GTGTTCAATCAGAGTAGCGGAAATATGGCCGC                  | 3,63  |
| TTCGGTGCAGCGGGCCGCTGTAACGCTTA                     | 3,79  |
| ATCAGCCCGGGCTTTTGCTAATACGCTGAGCG                  | 5,31  |
| ATGCTGTTGTTGCGGGGTTTCTGAACCGGAAC                  | 5,47  |
| CCGGGCTAATGAAGCCGTGACCCAGAGACTG                   | 5,63  |
| TCTGATGCACCGGGAGCCAGCCACTTAGCTGT                  | 5,79  |
| GTCAGTGTGATCGCGAGTTCCCTCTAGCTAGG                  | 7,31  |
| GTGATGCCAAAAGGGTGGATATGGAGCTGGAA                  | 7,47  |
| CGGCTCTGATTTCTAGTGACCTGGTATAATGG                  | 7,63  |
| CGGAGCTACCTGACCTCAATCATACTGCCAC                   | 7,79  |
| GGAAGGATTCATCCCTTTAAGAATGATCGCA                   | 9,31  |
| CAGTCTTTGAGATGTTGAACATCTTTTGGTTG                  | 9,47  |
| GCGTAAAGATCTCGCATTCTGGTGCCAAAAC                   | 9,63  |
| GCCGACTCGTTCAAGCACTATATCTGGCTAT                   | 9,79  |
| AAAAGATGTCTGTCAGCCCAAGCTTAGCATAA                  | 11,31 |
| GCGGCTGGACGACCCCGCGTGCAGCACTGA                    | 11,47 |
| CCGTCGAGCCCTGCGCGACAAACGCATATCCT                  | 11,63 |
| CGGCCGCCAAATTAATAGTCGATTACGCTTC                   | 11,79 |
| GCCTAAAGGTCCTTCCACGGTAATCGGGGGTACTCCGGCCTCCTGG    | 13,47 |
| TATATTAGCTTACCCACTCGCGTGGCAGTCTACGACTCGTCAACGA    | 13,79 |
| GGACTGTTCTACATAGTGACTTGGACGAGGTTCACTGGGCGCTATAC   | 17,31 |
| AGGAAACTCGAGGGGCTCCCTGTCTGTCGAGC                  | 17,47 |
| CCAGCGACCACTTCTGAGAAAAGATGCGGTGGCAGTAGTTGTGATTAG  | 17,63 |
| CTTGGGGGTGATATACCTCACTAAACTCCTTC                  | 17,79 |
| TAATGTGACTAAGCGT                                  | 19,31 |
| TAAGTCCAAAGGAAACCAGCTATCCCATATTCGATGTAAGCGGACATC  | 19,63 |
| TATGCGCCCGATATCCGTTCAAACCTAGGGGGC                 | 19,79 |
| TTCTGACCAAAGCTCA                                  | 22,16 |
| TGAGAATTGTAACAGGAACAGCTTAGAGCAG                   | 23,31 |
| TCAAAGTTCGGATACGCTACCTATGGACGGGGATATGCGACACCATGAT | 23,47 |
| CCGGATGAGTTATGAAGATCGTCATTGGGATA                  | 23,63 |
| TACAATCTCGAAGTAAAGCATAGCACCTGCG                   | 23,79 |
| AAGATAGGGTCACAGCAGTAATACCTCTACCT                  | 25,31 |
| TGTTGGACGTAAGCGTGAATAACGACCAGAA                   | 25,47 |
| AGCACGAGGATTATCACGTGTACCTCGAAATA                  | 25,63 |
| ATCGTTAGTTTCTCGACTGTTCCGAAACAGGC                  | 25,79 |
| AGCGGTAGCCTCCCACTTAACCTATGCCTTGG                  | 27,31 |
| TAAGTGAATTTCTCCTGGTTCCGCTAGCTGAT                  | 27,47 |
| CTATGGTCCCTAATAATAACCCTCGGAGGCAAG                 | 27,63 |
| GGGAGAGGGTGAAAACAGGCCACCTGGCTCGGG                 | 27,79 |
| GAGTGCCCCCTCGGCAGCCGCTCGGTTATAC                   | 29,31 |
| TCGTCAAAGCCTGCTTCCATAGCTAACCAGAT                  | 29,47 |
| TGTGCATTCCACGTGAGTCGTAATAAGCAA                    | 29,63 |
| ACGTGGGAGTGCCCCGAGCGTCTGAGGTATGGT                 | 29,79 |
| TTACCCACTATGTTGTCTCAAGTGCTAACAGT                  | 31,31 |
| ACTAATTATCCATAACTGTGCACGTCAGGGAT                  | 31,47 |
| TCTCACCGGTGGCCGTTGCTACATCAGTTTCT                  | 31,63 |
| TTGCACTCCTGGGGAACTATACTTACGCACT                   | 31,79 |
| GGTTTGGAGGGATTAGGCAATTGCTAGGTTGC                  | 33,31 |
| ATTGTAGGCACAATTTTTGATTGATCACATA                   | 33,47 |
| CATGGGCAATAAAGCTGTAGCCTGAGGCGCGC                  | 33,63 |
| AGCTGCACCGTGTACCTTGATATTGAGGGAC                   | 33,79 |
| ACCTCGTCATTTCGATAAACCCATACTGAGGGC                 | 35,31 |
| AGTGGGCGAGATCGGCTAATCATTAGTGCTCC                  | 35,47 |
| CTTAGTTAGTTCATAGTTCATTAGGGGCGGAA                  | 35,63 |
| ATGGGCTGGTGCCCCACGTACAGTAACCAACC                  | 35,79 |
| GTATGATTTTTTTTTT                                  | 0,23  |
| ACCCGAGCGTTCGGTTTCAGAAACAACCGTGACATCTTTGGGGTCGT   | 0,55  |
| TTTTTTTTTACAGCTAAGTGCTGGTTGAGACTCTCGACGGTTAATTG   | 0,87  |

|                                                      |       |
|------------------------------------------------------|-------|
| CACTGAGTTTTTTTT                                      | 2,23  |
| ATTTCCGCCCATCCCTAAGTAAACTACTCGATATCCTTCCAACATCTC     | 2,55  |
| TTTTTTTTCCGGTTTACGGAATTGCGGCCATCTTACGCGCTTGAAC       | 2,87  |
| GTATTAGCTTTTTTTT                                     | 4,23  |
| GGGGTCACAAGTGTGTCCACGGTCCGCTCAGCACACTGACACCCTTTT     | 4,55  |
| TTTTTTTTTAAAGCGTTACAGGCGGCAGTCTCTCAGAGCCGAGGTCAGG    | 4,87  |
| AGCTTGGGTTTTTTTTTTTTTTTTTAAAGGCCGGGCTGATCCCGCAAC     | 6,23  |
| CCATATCCTTATGCTAAACAGTCCGCCCTCG                      | 6,39  |
| CGTTTGTCTTCCAGCTAACAGCATGGCTTCATTAGCCCGGCTCCCGGT     | 6,55  |
| TATGATTGAGGATATGGTCTGCTGGGTATATCA                    | 6,71  |
| TTTTTTTTGTGGGACGGCATCAGATTTTTTTTT                    | 6,87  |
| GAGGGAACTTTTTTTTTTTTTTTGGAGATGCGGATACTTTGAAAAGGC     | 8,23  |
| AGATGTTCCCTAGCTA                                     | 8,39  |
| CCAGGTCACAACCAAAGACATGAATACTCTGAATGAACACCCCGCTGC     | 8,55  |
| ATAATAGTCCATTATA                                     | 8,71  |
| TTTTTTTTATAGCCAGGCACCGAATTTTTTTTT                    | 8,87  |
| TTTTTTTTGGGGATGA                                     | 9,8   |
| AAAGACTGTGCGAGAT                                     | 9,40  |
| GAGTCGGCTTTTTTTTT                                    | 9,72  |
| TTCTTAAATTTTTTTTTTTTTTTTGGAGCCACTTAACCTGGATAGGACA    | 10,23 |
| CGCACGGCTGCGATCAATTACCGTGGAAAGGAC                    | 10,39 |
| CACCAGAATCAGTCTGTAACAGTTGTGCGTTGAGTTCGTATATGCTCT     | 10,55 |
| ATCGACTAAGTTTTGGCACGCGAGTGGGTAAG                     | 10,71 |
| TTTTTTTTGAAGCGTACTATCTTCTTTTTTTTT                    | 10,87 |
| GCCGGAGTTTTTTTTTTTTTTTTTCTGACAGA                     | 12,23 |
| GACAGGGACCAAGGAGAATTCTCAGCGTATCC                     | 12,39 |
| CGAGTCGTGCTCGACACCAGCCGCGCAGGG                       | 12,55 |
| TTAGTGAGTCGTTTCGATCATCCGGTTACTTCG                    | 12,71 |
| TTTTTTTTGAAGGAGTGGGGCCGTTTTTTTT                      | 12,87 |
| CCAAGTCATTTTTTTTTTTTTTTTTTCGCGATC                    | 16,23 |
| CCCAGTGAACCTCGTTCACATTAGAATATGG                      | 16,39 |
| TCTTCTCGTATAGCGGGCATCACCTAGAAAT                      | 16,55 |
| AACTACTGCCACCGCATGGAGTTAGGATATCG                     | 16,71 |
| TTTTTTTTCTAATCACTAGCTCCGTTTTTTTT                     | 16,87 |
| AGCTGTTCTTTTTTTTTTTTTTTCTATGTAAG                     | 18,23 |
| CTTACATCTGCTCTAGGGCACTCAAAGCAGG                      | 18,39 |
| TGACGATCGATGTCCGAGTTTCTCAGAAAGTG                     | 18,55 |
| GTTTGAACATCCAAAATGCACATCGGGCAC                       | 18,71 |
| TTTTTTTTGCCCCCTACCCCCAAGTTTTTTTT                     | 18,87 |
| GGTCAGAATTTTTTTTTTTTTTTTACCCCCG                      | 22,23 |
| CATAGGTATGAGCTTTCCTATCTACGCTTAC                      | 22,39 |
| GTCGCATATCCCCGTCCTTAGGCAGACGTGC                      | 22,55 |
| GCTATGCTATCATGGTCTCGTCTCGAGAAA                       | 22,71 |
| TTTTTTTTCGCAGGGTCTAATATATTTTTTTTT                    | 22,87 |
| GTATTACTTTTTTTTTTTTTTTTCTGTTTAC                      | 24,23 |
| AGCTATGGAGGTAGAGGACGAGGTGCCGATCTCGCCACTCTATGAAC      | 24,39 |
| GGTACACGATCGGGTTGAACCTTGATTACATAAC                   | 24,55 |
| TCAGACGCTATTTTCGATAACTAAGTGGGGCACCAGCCATTTTTTTTT     | 24,71 |
| TTTTTTTTACCATAACCAGATTGATTTTTTTTT                    | 24,87 |
| TAGGTTAATTTTTTTTT                                    | 26,23 |
| GTTATTTCCCAAGGCATCCAAACCAAATTTGTCCTACAATAGCTTTAT     | 26,39 |
| CGAGGGTTTTCTGGTC                                     | 26,55 |
| CGGAACAGCTTGCCTCTGCCATGGTGACACGGTGCAGCTTTTTTTTT      | 26,71 |
| TTTTTTTTGCCTGTTT                                     | 26,87 |
| CTACCGCTAGGAGAAA                                     | 27,24 |
| GACCATAGTGTTCAC                                      | 27,56 |
| GAGGCGGCTTTTTTTTTTTTTTTTACGCTTAG                     | 28,23 |
| GCGGAACCGTATAACCGTGGGTAAGTTATGGATAATTAGTACGGCCAC     | 28,39 |
| AGTACGACATCAGCTAGATAGCTGGTTCCCTT                     | 28,55 |
| AGGTGGCCTTGCTTTACGGTGAGATTCCCCAGGAGTGCAATTTTTTTTT    | 28,71 |
| TTTTTTTTCCCGAGCCGGCGCATATTTTTTTTT                    | 28,87 |
| CGTGACAGCCCTCAGTATGGTTTTTTTTTTTTTTTTTTTGGCCAGG       | 30,39 |
| AGTATAGTTCCGCCCTAATGAAATCCCTGACTTGACGATCACGTGG       | 30,71 |
| TTTTTTTTAGTGCGTATCCACGTTTTTTTTTT                     | 30,87 |
| TTTTTTTTACAACATA                                     | 31,8  |
| CGAATCAAACCTGTTAGCACTTGAGTTTTTTTTTTTTTTTTTTTGTGGGAGG | 32,39 |
| ATATCAAGAGAACTGATGTAGCATATGTGATATCAGTTAATATTAAG      | 32,71 |
| TTTTTTTTGTCCCTCACCTCTCCCTTTTTTTTT                    | 32,87 |

|                                                   |       |
|---------------------------------------------------|-------|
| TTTTTTTCTAATCCC                                   | 33,8  |
| AATGATTAGCAACCTAGCAATTGCTTTTTTTTTTTTTTTTGGCTGTGAC | 34,39 |
| ACTGTACGGCGCGCCTCAGGCTACGGAGCACTGTCCAACATGATAATC  | 34,71 |
| TTTTTTTGGTTGGTTCIAACGATTTTTTTT                    | 34,87 |
| TTTTTTTATCCGAAT                                   | 35,8  |

### S3.1 ZX-4H×4H×32B-cuboid crystal sequences

|                                                  |       |
|--------------------------------------------------|-------|
| CCAGGTAAAGTGGCTCAATCATACTCACGGTT                 | 1,23  |
| AACTGTTGTGTCCTATGTTTACTTAGGGATGG                 | 1,39  |
| TACGAACTCAACGCACGCTCGGGTAGTCTCAA                 | 3,23  |
| GAAGATAGAGAGCATAAATTCGCTAAACCGGA                 | 3,39  |
| AAAGTATCCGCATCTCACTCAGTGATCGAGTA                 | 5,23  |
| TTCATGTCGCCTTTTCGAACGGTGACACACTT                 | 5,39  |
| GTGTTCAATCAGAGTAGCGGAAATATGGCCGC                 | 7,23  |
| TTCGGTGCAGCAGCGGGCCGCTGTAACGCTTA                 | 7,39  |
| ATCAGCCCGGGCTTTTGCTAATACGCTGAGCG                 | 9,23  |
| ATGCTGTTGTTGCGGGGTTTCTGAACCGGAAC                 | 9,39  |
| CCGGGCTAATGAAGCCGTGACCCAGAGACTG                  | 11,23 |
| TCTGATGCACCGGGAGCCAGCCACTTAGCTGT                 | 11,39 |
| GTCAGTGTGATCGCGAGTTCCCTCTAGCTAGG                 | 13,23 |
| GTGATGCCAAAAGGGTGGATATGGAGCTGGAA                 | 13,39 |
| CGGCTCTGATTCTAGTGACCTGGTATAATGG                  | 15,23 |
| CGGAGCTACCTGACCTCAATCATACTGCCAC                  | 15,39 |
| GTATGATTTCCGGTTTAGCGAATTAACCGTGAATGAACCCCGCTGC   | 0,15  |
| ACCCGAGCCCATCCCTAAGTAAACTTGAGACTGATACTTTGAAAAGGC | 2,15  |
| ATTTCCGCAAGTGTGTCTATCTTCGTGCGTTGAGTTCGTATATGCTCT | 4,15  |
| CACCGTTCGCGGCCATTAGCCCGGCTCCCGGT                 | 4,31  |
| CACTGAGTTAAGCGTTCAACAGTTGAGCCACTTAACCTGGATAGGACA | 6,15  |
| ACAGGCGTACTCGATGGGCTGATCCCGCAAC                  | 6,31  |
| GTATTAGCACAGCTAAGCACCGAATACTCTGA                 | 8,15  |
| GTGGCTGGCGCTCAGCCAGAGCCGAGGTCAGGTAGCTCCGCTAGAAAT | 8,31  |
| GGGGTCACGTTCCGGTGACATGAAGAGATGCG                 | 10,15 |
| TCAGAAACCAGTCTCTACTGACACCCTTTTGGCATCACTCGCGATC   | 10,31 |
| CCATATCCCATATACCAGGTCATTCCAGCTGCATCAGAGGCTTCAT   | 12,31 |
| TATGATTGCCTAGCTAGAGGGAACGTGGGACGAACAGCATAAAAGCCC | 14,31 |

### S3.2 ZX-4H×6H×32B-cuboid crystal sequences

|                                                  |       |
|--------------------------------------------------|-------|
| CCAGGTAAAGTGGCTCAATCATACTCACGGTT                 | 1,23  |
| AACTGTTGTGTCCATGTTTACTTAGGGATGG                  | 1,39  |
| TACGAACTCAACGCACGCTCGGGTAGTCTCAA                 | 3,23  |
| GAAGATAGAGAGCATAAATTCGCTAAAACCGGA                | 3,39  |
| AAAGTATCCGCATCTCACTCAGTGATCGAGTA                 | 5,23  |
| TTCATGTCGCCTTTTCGAACGGTGACACACTT                 | 5,39  |
| GTGTTCAATCAGAGTAGCGGAAATATGGCCGC                 | 7,23  |
| TTCGGTGCAGCAGCGGGCCGCTGTAACGCTTA                 | 7,39  |
| ATCAGCCCGGGCTTTTGCTAATACGCTGAGCG                 | 9,23  |
| ATGCTGTTGTTGCGGGGTTTCTGAACCGGAAC                 | 9,39  |
| CCGGGCTAATGAAGCCGTGACCCAGAGACTG                  | 11,23 |
| TCTGATGCACCGGGAGCCAGCCACTTAGCTGT                 | 11,39 |
| GTCAGTGTGATCGCGAGTCCCTCTAGCTAGG                  | 13,23 |
| GTGATGCCAAAAGGGTGGATATGGAGCTGGAA                 | 13,39 |
| CGGCTCTGATTTCTAGTGACCTGGTATAATGG                 | 15,23 |
| CGGAGCTACCTGACCTCAATCATACTGCCAC                  | 15,39 |
| GGAAGGATTCATCCCTTAAAGATGATCGCA                   | 17,23 |
| CAGTCTTTGAGATGTTGAACATCTTTTGGTTG                 | 17,39 |
| GCGTAAAGATCTCGCATTCTGGTGCCAAAAC                  | 19,23 |
| GCCGACTCGTTCAAGCACTATATCTGGCTAT                  | 19,39 |
| AAAAGATGTCTGTCAGCCCAAGCTTAGCATAA                 | 21,23 |
| GCGGCTGGACGACCCCGCGTGCGACGACTGA                  | 21,39 |
| CCGTCGAGCCCTGCGCGACAAAACGCATATCCT                | 23,23 |
| CGGCCCGCCAAATTAATAGTCGATTACGCTTC                 | 23,39 |
| GTATGATTTCCGGTTTAGCGAATTAACCGTGAATGAACACCCCGCTGC | 0,15  |
| ACCCGAGCCCATCCCTAAGTAAACTTGAGACTGATACTTTGAAAAGGC | 2,15  |
| ATTTCCGCAAGTGTGTCTATCTTCGTGCGTTGAGTTCGTATATGCTCT | 4,15  |
| CACCGTTCGCGGCCATTAGCCCGGCTCCCGGT                 | 4,31  |
| CACTGAGTTAAGCGTTCAACAGTTGAGCCACTTAACCTGGATAGGACA | 6,15  |
| ACAGGCGGTACTCGATGGGCTGATCCCGCAAC                 | 6,31  |
| GTATTAGCACAGCTAAGCACCGAATACTCTGA                 | 8,15  |
| GTGGCTGGCGCTCAGCCAGAGCCGAGGTCAGG                 | 8,31  |
| GGGGTCACGTTCCGGTGACATGAAGAGATGCG                 | 10,15 |
| TCAGAAACCAAGTCTCTACACTGACACCCTTTT                | 10,31 |
| CCAGGTCATTCCAGCTGCATCAGAGGCTTCAT                 | 12,15 |
| CCATATCCCAATTATACTTTACGCGCTTGAAC                 | 12,31 |
| GAGGGAACGTGGGACGAACAGCATAAAAAGCCC                | 14,15 |
| TATGATTGCCTAGCTAATCCTTCCAACATCTC                 | 14,31 |
| TTCTTAAAATAGCCAGTAGCTCCGCTAGAAAT                 | 16,15 |
| ATAATAGTTGCGATCACTCGACGGTTAATTTGGCGGGCCGGCGCAGGG | 16,31 |
| CACCAGAACAAACCAAAGGCATCACTCGCGATC                | 18,15 |
| AGATGTTGAGTTTTGGCATCTTTGGGGTTCGTCCAGCCGCTGACAGA  | 18,31 |
| CGCACGGCAGGATATGCGTTTGTCTCAGTCGTGAGTCGGCTGCGAGAT | 20,31 |
| ATCGACTATTATGCTAAGCTTGGGGAAGCGTAAAAGACTGGGGGATGA | 22,31 |

### S3.3 ZX-4H×10H×32B-cuboid crystal sequences

|                                                  |       |
|--------------------------------------------------|-------|
| CCAGGTAAAGTGGCTCAATCATACTCACGGTT                 | 1,23  |
| AACTGTTGTGTCCATGTTTACTTAGGGATGG                  | 1,39  |
| TACGAACTCAACGCACGCTCGGGTAGTCTCAA                 | 3,23  |
| GAAGATAGAGAGCATAAATTCGCTAAAACCGGA                | 3,39  |
| AAAGTATCCGCATCTCACTCAGTGATCGAGTA                 | 5,23  |
| TTCATGTCGCCTTTTCGAACGGTGACACACTT                 | 5,39  |
| GTGTTCAATCAGAGTAGCGGAAATATGGCCGC                 | 7,23  |
| TTCGGTGCAGCAGCGGGCCGCTGTAACGCTTA                 | 7,39  |
| ATCAGCCCGGGCTTTTGCTAATACGCTGAGCG                 | 9,23  |
| ATGCTGTTGTTGCGGGGTTTCTGAACCGGAAC                 | 9,39  |
| CCGGGCTAATGAAGCCGTGACCCAGAGACTG                  | 11,23 |
| TCTGATGCACCGGGAGCCAGCCACTTAGCTGT                 | 11,39 |
| GTCAGTGTGATCGGAGTTCCTCTAGCTAGG                   | 13,23 |
| GTGATGCCAAAAGGGTGGATATGGAGCTGGAA                 | 13,39 |
| CGGCTCTGATTTCTAGTGACCTGGTATAATGG                 | 15,23 |
| CGGAGCTACCTGACCTCAATCATACTGCCAC                  | 15,39 |
| GGAAGGATTCATCCCTTTAAGAATGATCGCA                  | 17,23 |
| CAGTCTTTGAGATGTTGAACATCTTTTGGTTG                 | 17,39 |
| GCGTAAAGATCTCGCATTCTGGTGCCAAAAC                  | 19,23 |
| GCCGACTCGTTCAAGCACTATATCTGGCTAT                  | 19,39 |
| AAAAGATGTCTGTCAGCCAAAGCTTAGCATAA                 | 21,23 |
| GCGGCTGGACGACCCCGCGTGCAGCAGCTGA                  | 21,39 |
| CCGTCGAGCCCTGCGCGACAAAACGCATATCCT                | 23,23 |
| CGGCCGCCAAATTAATAGTCGATTACGCTTC                  | 23,39 |
| GCCTAAAAGTCTTCCACGGTAATCGGGGGTG                  | 25,23 |
| ACTCCGGCTCCTTGGTATATTAGCTTACCCA                  | 25,39 |
| CTCGCGTGGCACGCTTACGACTCGTCGAACGA                 | 27,23 |
| GGACTGTTCTACATAGTGACTTGGACGAGGTT                 | 27,39 |
| TACTGGGCGCTATACAGGAAACTCGAGGGGC                  | 29,23 |
| TCCCTGTCTGTCGAGCCAGCGACCACTTCTG                  | 29,39 |
| GAGAAAGATGCGGTGGCAGTAGTTGTGATTAG                 | 31,23 |
| CTTGGGGGTGATATACCTCACTAAACTCCTTC                 | 31,39 |
| TAATGTGACTAAGCGTAACTCCAAAGGAAAC                  | 33,23 |
| CAGCTATCCCATATTTCGATGTAAGCGGACATC                | 33,39 |
| TATGCGCCGATATCCGTTCAAACCTAGGGGGC                 | 35,23 |
| TTCTGACCAAAGCTCATGAGAATTGTAAACAG                 | 35,39 |
| GAACAGCTTAGAGCAGTCAAGTTCGGATACGC                 | 37,23 |
| TACCTATGGACGGGATATGCGACACCATGAT                  | 37,39 |
| CCGGATGAGTTATGAAGATCGTCATTGGGATA                 | 39,23 |
| TACAATCTCGAAGTAAAGCATAGCACCCCTGCG                | 39,39 |
| GTATGATTTCCGGTTTAGCGAATTAACCGTGAATGAACACCCCGCTGC | 0,15  |
| ACCCGAGCCCATCCCTAAGTAAACTTGAGACTGATACTTTGAAAAGGC | 2,15  |
| ATTTCGCAAGTGTGTCTATCTTCGTGCGTTGAGTTCGTATATGCTCT  | 4,15  |
| CACCGTTCGCGGCCATTAGCCCGGCTCCCGGT                 | 4,31  |
| CACTGAGTTAAGCGTTCAACAGTTGAGCCACTTAACCTGGATAGGACA | 6,15  |
| ACAGGCGTACTCGATGGGCTGATCCCGCAAC                  | 6,31  |
| GTATTAGCACAGCTAAGCACCGAATACTCTGA                 | 8,15  |
| GTGGCTGGCGCTCAGCCAGAGCCGAGGTCAGG                 | 8,31  |
| GGGGTACGTTCCGGTGACATGAAGAGATGCG                  | 10,15 |
| TCAGAAACCAGTCTCTACACTGACACCCTTTT                 | 10,31 |
| CCAGGTCAITCCAGCTGCATCAGAGGCTTCAT                 | 12,15 |
| CCATATCCCATTATACTTTACGCGCTTGAAC                  | 12,31 |
| GAGGGAACGTGGGACGAACAGCATAAAAAGCCC                | 14,15 |
| TATGATTGCCTAGCTAATCCTTCCAACATCTC                 | 14,31 |
| TTCTTAAAATAGCCAGTAGCTCCGCTAGAAAT                 | 16,15 |
| ATAATAGTTGCGATCACTCGACGGTTAATTTG                 | 16,31 |
| CACCAGAAACAACAAAGGCATCACTCGCGATC                 | 18,15 |
| AGATGTTCAAGTTTGGCATCTTTGGGGTTCGT                 | 18,31 |
| CGTTTGTCTCAGTCGTGAGTCGGCTGCGAGAT                 | 20,15 |
| CGCACGGCAGGATATGCACGCGAGCTATGTAG                 | 20,31 |
| AGCTTGGGGAAGCGTAAAAGACTGGGGGATGA                 | 22,15 |
| ATCGACTATTATGCTACTTTAGGCCCAAGGAG                 | 22,31 |
| ATTACCGTAACTCGTGCGGGCCGCGCAGGG                   | 24,15 |
| CCAAGTCAACCCCCGTCTTTCGTATATCA                    | 24,31 |
| CGAGTCGTTGGGTAAGCCAGCCGCTGACAGA                  | 26,15 |
| CTAATATATCGTTCCGACCCAGTGAGCTCGACA                | 26,31 |



|                                                  |       |
|--------------------------------------------------|-------|
| AACTACTGCAGAAGTGAACAGTCCAGACGTGC                 | 28,15 |
| GTCGCTGGCTAATCACGGCGCATATGAGCTTT                 | 28,31 |
| AGTTTCCTGAAGGAGTGCCGGAGTGGAAGGAC                 | 30,15 |
| TTAGTGAGGCCCTCGTCACATTAGAATATGG                  | 30,31 |
| TGGAGTTACTGTTTACCCCCAAGCCACCGCA                  | 32,15 |
| AATTCTCAGTTTCCTTTCATCCGGTTACTTCGAGATTGTATTCATAAC | 32,31 |
| GTTTGAACGATGTCCGGACAGGGAGTATAGCG                 | 34,15 |
| CTTACATCGCCCCTAAGCTGTTCTCCCGTCCATAGGTACTGCTCTA   | 34,31 |
| GTCGCATATATCCCAATGACGATCATCATGGTGGTCAGAAGGATATCG | 36,31 |
| GCTATGCTGCGTATCCGAACCTGACGCAGGGTGATAGCTGACGCTTAG | 38,31 |

### S3.4 ZX-4H×20H×32B-cuboid crystal sequences

|                                   |       |
|-----------------------------------|-------|
| CCAGGTAAAGTGGCTCAATCATACTCACGGTT  | 1,23  |
| AACTGTTGTGTCCATGTTTACTTAGGGATGG   | 1,39  |
| TACGAACTCAACGCACGCTCGGGTAGTCTCAA  | 3,23  |
| GAAGATAGAGAGCATAAATTCGCTAAAACCGGA | 3,39  |
| AAAGTATCCGCATCTCACTCAGTGATCGAGTA  | 5,23  |
| TTCATGTCGCCTTTTCGAACGGTGACACACTT  | 5,39  |
| GTGTTCATTACAGAGTAGCGGAAATATGGCCGC | 7,23  |
| TTCGGTGCAGCAGCGGGCCGCTGTAACGCTTA  | 7,39  |
| ATCAGCCCGGGCTTTTGCTAATACGCTGAGCG  | 9,23  |
| ATGCTGTTGTTGCGGGGTTTCTGAACCGGAAC  | 9,39  |
| CCGGGCTAATGAAGCCGTGACCCAGAGACTG   | 11,23 |
| TCTGATGCACCGGGAGCCAGCCACTTAGCTGT  | 11,39 |
| GTCAGTGTGATCGGAGTTCCTCTAGCTAGG    | 13,23 |
| GTGATGCCAAAAGGGTGGATATGGAGCTGGAA  | 13,39 |
| CGGCTCTGATTCTAGTGACCTGGTATAATGG   | 15,23 |
| CGGAGCTACCTGACCTCAATCATACTGCCAC   | 15,39 |
| GGAAGGATTCATCCCTTTAAGAATGATCGCA   | 17,23 |
| CAGTCTTTGAGATGTTGAACATCTTTTGGTTG  | 17,39 |
| GCGTAAAGATCTCGCATTCTGGTGCCAAAAC   | 19,23 |
| GCCGACTCGTTCAAGCACTATATCTGGCTAT   | 19,39 |
| AAAAGATGTCTGTCAGCCAAAGCTTAGCATAA  | 21,23 |
| GCGGCTGGACGACCCCGCGTGCAGCAGCTGA   | 21,39 |
| CCGTCGAGCCCTGCGCGACAAAACGCATATCCT | 23,23 |
| CGGCCCGCCAAATTAATAGTCGATTACGCTTC  | 23,39 |
| GCCTAAAAGTCTTCCACGGTAATCGGGGGTG   | 25,23 |
| ACTCCGGCCTCCTGGTATATTAGCTTACCCA   | 25,39 |
| CTCGCGTGGCACGCTACGACTCGTCGAACGA   | 27,23 |
| GGACTGTTCTACATAGTGACTTGACGAGGTT   | 27,39 |
| TCACTGGGCGCTATACAGGAAACTCGAGGGGC  | 29,23 |
| TCCCTGTCTGTCGAGCCAGCGACCACTTCTG   | 29,39 |
| GAGAAAGATGCGGTGGCAGTAGTTGTGATTAG  | 31,23 |
| CTTGGGGGTGATATACCTCACTAAACTCCTTC  | 31,39 |
| TAATGTGACTAAGCGTAACTCCAAAGGAAAC   | 33,23 |
| CAGCTATCCCATATTCGATGTAAGCGGACATC  | 33,39 |
| TATGCGCCCGATATCCGTTCAAACCTAGGGGGC | 35,23 |
| TTCTGACCAAAGCTCATGAGAATTGTAAACAG  | 35,39 |
| GAACAGCTTAGAGCAGTCAAGTTCGGATACGC  | 37,23 |
| TACCTATGGACGGGATATGCGACACCATGAT   | 37,39 |
| CCGGATGAGTTATGAAGATCGTCATTGGGATA  | 39,23 |
| TACAATCTCGAAGTAAAGCATAGCACCTGCG   | 39,39 |
| AAGATAGGGTCACAGCAGTAATACCTCTACCT  | 41,23 |
| TGTTGGACGTAAGCGTGAATAACGACCAGAA   | 41,39 |
| AGCACGAGGATTATCACGTGTACCTCGAAATA  | 43,23 |
| ATCGTTAGTTTCTCGACTGTTCCGAAACAGGC  | 43,39 |
| AGCGGTAGCCTCCCACTTAACCTATGCCTTGG  | 45,23 |
| TAACTGATTTTCTCCTGGTTCCGCTAGCTGAT  | 45,39 |
| CTATGGTCCCTAATATAACCCTCGGAGGCAAG  | 47,23 |
| GGGAGAGGGTGAAACAGGCCACCTGGCTCGGG  | 47,39 |
| GAGTGCCCCCTCGGCAGCCGCTCGGTTATAC   | 49,23 |
| TCGTCAAGCCTGCTTCCATAGCTAACCCGAT   | 49,39 |
| TGTGCATTCCACGTGAGTCGTACTTAAAGCAA  | 51,23 |
| ACGTGGGAGTGCCCGAGCGTCTGAGGTATGGT  | 51,39 |
| TTACCCACTATGTTGTCTCAAAGTGCTAACAGT | 53,23 |
| ACTAATTATCCATAACTGTGCACGTCAGGGAT  | 53,39 |
| TCTCACCGGTGGCCGTTGTACATCAGTTTCT   | 55,23 |
| TTGCACTCCTGGGGAAACTATACTTACGCACT  | 55,39 |
| GGTTTGGAGGGATTAGGCAATTGCTAGGTTGC  | 57,23 |
| ATTGTAGGCACAATTTTGTGATTTCGATCATA  | 57,39 |
| CATGGGCAATAAAGCTGTAGCCTGAGGCGCGC  | 59,23 |
| AGCTGCACCGTGTACACCTTGATATTGAGGGAC | 59,39 |
| ACCTCGTCATTCCGATAAACCATACTGAGGGC  | 61,23 |
| AGTGGGCGAGATCGGCTAATCATTAGTGCTCC  | 61,39 |
| CTTAGTTAGTTCATAGTTCATTAGGGGCGGAA  | 63,23 |
| ATGGGCTGGTGCCCCACGTACAGTAACCAACC  | 63,39 |
| GGTGTACCTGTGGGTAGGGCCGAGCGCTGGGC  | 65,23 |
| TTACATGTGCAAGTGAATATATGACTTGGTC   | 65,39 |

|                                                  |       |
|--------------------------------------------------|-------|
| GACCAGATCTGCTAGAAACCACCAACATCCTC                 | 67,23 |
| CTTGACACCTTTCAATTTTTAGTAAACACCCA                 | 67,39 |
| ACAGAGCTGAACTTCCCATGGTCGTTCTACTG                 | 69,23 |
| TCGTATGATCATAGGATCAAACATAAATACAGC                | 69,39 |
| GTACCGCCAGTTCTTGTCTTATTGGCGATCG                  | 71,23 |
| TGCATTCCAATGTTTGATGGCCGCGTGGCTTA                 | 71,39 |
| TTAAGACGGCCGGTGTAAACCACATAAAAGTCGT               | 73,23 |
| CCGCCTCCGGTAGTCAACGCGGAACGTAATGG                 | 73,39 |
| CAGAAAGTCTATACCCGACAAAAACAGATTTG                 | 75,23 |
| TACCGGGGTGAACAGCACGTGCGGCTTCTCCT                 | 75,39 |
| GTATCGCCTTGTGATTTATACTTTGCGGGGG                  | 77,23 |
| GGTCGAGCGCTCCACTGTAGTGGCCGGCCATC                 | 77,39 |
| GTGGACTAGAAAAGCGCCGCAATCTGAATATC                 | 79,23 |
| GCTACCTCCGATACGGAACCAGAACCATTTA                  | 79,39 |
| GTATGATTTCCGGTTTAGCGAATTAACCGTGAATGAACCCCGCTGC   | 0,15  |
| ACCCGAGCCCATCCCTAAGTAAACTTGAGACTGATACTTTGAAAAGGC | 2,15  |
| ATTTCCGCAAGTGTGTCTATCTTCGTGCGTTGAGTTCGTATATGCTCT | 4,15  |
| CACCGTTCGCGGCCATTAGCCCGGCTCCCGGT                 | 4,31  |
| CACTGAGTTAAGCGTTCAACAGTTGAGCCACTTAACCTGGATAGGACA | 6,15  |
| ACAGGCGTACTCGATGGGCTGATCCCGCAAC                  | 6,31  |
| GTATTAGCACAGCTAAGCACCGAATACTCTGA                 | 8,15  |
| GTGGCTGGCGCTCAGCCAGAGCCGAGGTCAGG                 | 8,31  |
| GGGGTACGTTCCGGTGACATGAAGAGATGCG                  | 10,15 |
| TCAGAAACCAGTCTCTACACTGACACCCTTTT                 | 10,31 |
| CCAGGTCAATCCAGCTGCATCAGAGGCTTCAT                 | 12,15 |
| CCATATCCCCATTATACTTTACGCGCTTGAAC                 | 12,31 |
| GAGGGAACGTGGGACGAACAGCATAAAAAGCCC                | 14,15 |
| TATGATTGCCCTAGCTAATCCTTCCAACATCTC                | 14,31 |
| TTCTTAAAATAGCCAGTAGTCCGCTAGAAAT                  | 16,15 |
| ATAATAGTTGCGATCACTCGACGGTTAATTTG                 | 16,31 |
| CACCAGAACAACAAAAGGCATCACTCGCGATC                 | 18,15 |
| AGATGTTCAAGTTTGGCATCTTTTGGGGTCGT                 | 18,31 |
| CGTTTGTCTCAGTCGTGAGTCGGCTGCGAGAT                 | 20,15 |
| CGCACGGCAGGATATGCACGCGAGCTATGTAG                 | 20,31 |
| AGCTTGGGGAAGCGTAAAAGACTGGGGGATGA                 | 22,15 |
| ATCGACTATTATGCTACTTTAGGCCAAGGAG                  | 22,31 |
| ATTACCGTAACTCTGTGCGGGCCGGCGCAGGG                 | 24,15 |
| CCAAGTCACACCCCGTCTTTCTCGTATATCA                  | 24,31 |
| CGAGTCGTTGGGTAAGCCAGCCGCCTGACAGA                 | 26,15 |
| CTAATATATCGTTCCGACCCAGTGAGCTCGACA                | 26,31 |
| AACTACTGCAGAAGTGAACAGTCCAGACGTGC                 | 28,15 |
| GTCGCTGGCTAATCACGGCGCATATGAGCTTT                 | 28,31 |
| AGTTTCTGAAGGAGTGCCGGAGTGGAAGGAC                  | 30,15 |
| TTAGTGAGGCCCCGTCACATTAGAATATGG                   | 30,31 |
| TGGAGTACTGTTTACCCCCAAGCCACCGCA                   | 32,15 |
| AATTCTCAGTTTCTTTTATCCGGTTACTTCG                  | 32,31 |
| GTTTGAACGATGTCCGGACAGGGAGTATAGCG                 | 34,15 |
| CTTACATCGCCCTAAGCTGTTCTCCCGTC                    | 34,31 |
| TGACGATCATATGGTGGTCAAGGATATCG                    | 36,15 |
| GTCGCATATATCCAACTCGTGCTTCGAGAAA                  | 36,31 |
| GAAC TTGACG CAGGGTGATAGCTGACGCTTAG               | 38,15 |
| GCTATGCTGCGTATCCCCTATCTTACGCTTAC                 | 38,31 |
| GTATTACTGCCTGTTTAGATTGATTCATAAC                  | 40,15 |
| CGGAACAGAGGTAGAGGACCATAGTGTTCAC                  | 40,31 |
| GGTACACGTTCTGGTCCATAGTACTGCTCTA                  | 42,15 |
| GTTATTTCTATTTGACTACCGCTAGGAGAAA                  | 42,31 |
| CGAGGGTTATCAGCTACTAACGATTGATAATC                 | 44,15 |
| GCGGAACCTTGCCTCAATGCACATCGGGCAC                  | 44,31 |
| TAGGTTAACCCGAGCCGTCCAACAGCTGTGAC                 | 46,15 |
| AGGTGGCCCCAAGGCAGGGCACTCAAAGCAGG                 | 46,31 |
| GAGGCGGCACCATAACCCCTCTCCCATATTAAG                | 48,15 |
| TCAGACGCGTATAACCCGGTGAATTCACCAG                  | 48,31 |
| AGTACGACATCGGGTTATCAGTTAGTGGGAGG                 | 50,15 |
| AGCTATGGTTGCTTTAGTGGGTAAGTTATGGA                 | 50,31 |
| ATGTAGCAATCCCTGATCCACGTTACAGTGG                  | 52,15 |
| CGTGACAAGAACTGTGCCATGGTGACACG                    | 52,31 |
| CAC TTGAGAGT GCGTACTT GACGATGCCGAGG              | 54,15 |
| AGTATAGTACTGTTAGTCCAAACCAAATTGTG                 | 54,31 |

|                                                  |       |
|--------------------------------------------------|-------|
| GCAATTGCGTCCCTCAGAGTGCAAACGGCCAC                 | 56,15 |
| ATATCAAGGCAACCTATAACTAAGTGGGGCAC                 | 56,31 |
| CAGGCTACTATGTGATTAATTAGTACAACATA                 | 58,15 |
| CGAATCAAGCGCGCCTGACGAGGTGCCGATCT                 | 58,31 |
| CTAATGAAGGAGCACTGTGCAGCTAGCTTTAT                 | 60,15 |
| AATGATTATCCGCCCATCTGGTCATTGAAAAG                 | 60,31 |
| TATGGTTTGGTTGGTTCCTACAATCTAATCCC                 | 62,15 |
| ACTGTACGGCCCTCAGGGTACACCTCACTTGC                 | 62,31 |
| CTCGGCCCTGGGTGTTAGCCCATCTATGAAC                  | 64,15 |
| TACTAAAAGCCCAGCGGGCGGTACCAAACATT                 | 64,31 |
| TGGTGGTTGACCAAGTCGCCCACTATCCGAAT                 | 66,15 |
| CATATATTGAGGATGTAGCTCTGTTCCCTATGA                | 66,31 |
| AATAAGGAGCTGTATTGTGTCAAGTCTAGCAG                 | 68,15 |
| TAGTTTGACGATCGCCACTTCTGGCTGTTC                   | 68,31 |
| CGACCATGTAAGCCACACATGTAATACCCACA                 | 70,15 |
| GCGGCCATCAGTAGAACGTCTTAATGACTACC                 | 70,31 |
| ATGTGGTTAGGAGAAGGGAATGCACAAGAACT                 | 72,15 |
| CCGCACGTACGACTTTTAGTCCACGCGTATCGGAGGTAGCGCGCTTTC | 72,31 |
| TTTTTGTCCCATACGTCATACGAGGAAGTTC                  | 74,15 |
| TCCGCGTCAAATCTGGGCGATACAGTGGAGCGCTCGACCATACACAA  | 74,31 |
| GCCACTACGATATTCAGATTGCCGGATGGCCGCCCGGTAGGGTATAG  | 76,31 |
| TCTGGTTCCCCCGCAAGAGTATATAAATGGTGGAGGCGGACACCGGC  | 78,31 |

### S3.5 ZX-32H×64B-channel crystal sequences

|                                                   |       |
|---------------------------------------------------|-------|
| CCAGGTAAAGTGGCTCAATCATACTCACGGTAACTGTTGTGTCCTAT   | 1,47  |
| GTTTACTTAGGGATGGTACGAACTCAACGCACGCTCGGGTAGTCTCAA  | 1,79  |
| GAAGATAGAGAGCATAAATTCGCTAAACCGGAAAAGTATCCGCATCTC  | 5,31  |
| ACTCAGTGATCGAGTATTCATGTCGCCTTTTC                  | 5,47  |
| GAACGGTGACACACTTGTGTTCAATCAGAGTAGCGGAAATATGGCCGC  | 5,63  |
| TTCGGTGCAGCGGGCCGCTGTAACGCTTA                     | 5,79  |
| ATCAGCCCGGGCTTTTGCTAATACGCTGAGCGATGCTGTTGTTGCGGG  | 7,31  |
| GTTTCTGAACCGGAAACCGGGCTAATGAAGCCGTGACCCAGAGACTG   | 7,63  |
| TCTGATGCACCGGGAGCCAGCCACTTAGCTGT                  | 11,31 |
| GTCAGTGTGATCGCGAGTTCCCTTAGCTAGGGTGATGCCAAAAGGGT   | 11,47 |
| GGATATGGAGCTGGAACGGCTCTGATTTCTAG                  | 11,63 |
| TGACCTGGTATAATGGCGGAGCTACCTGACCTCAATCATACTGCCAC   | 11,79 |
| GGAAGGATTCATCCCTTTAAGAAATGATCGCA                  | 13,31 |
| CAGTCTTTGAGATGTTGAACATCTTTTGGTTG                  | 13,47 |
| GCGTAAAGATCTCGCATTCTGGTGCCAAAAC                   | 13,63 |
| GCCGACTCGTTCAAGCACTATATCTGGCTAT                   | 13,79 |
| AAAAGATGTCTGTCAGCCCAAGCTTAGCATAA                  | 15,31 |
| GCGGCTGGACGACCCCGCCGTGCGACGACTGA                  | 15,47 |
| CCGTCGAGCCCTGCGCGACAAACGCATATCCT                  | 15,63 |
| CGGCCCGCCAAATTAATAGTCGATTACGCTTC                  | 15,79 |
| GCCTAAAGGTCCTTCCACGGTAATCGGGGGTG                  | 17,31 |
| ACTCCGGCCTCCTTGGTATATTAGCTTACCCA                  | 17,47 |
| CTCGCGTGGCACGTCTACGACTCGTCGAACGA                  | 17,63 |
| GGACTGTCTACATAGTACTGGACGAGGTT                     | 17,79 |
| TCACTGGGCGCTATACAGGAACTCGAGGGGG                   | 19,31 |
| TCCCTGTCTGTCGAGCCAGCGACCACTTCTG                   | 19,47 |
| GAGAAAAGATGCGGTGGCAGTAGTTGTGATTAG                 | 19,63 |
| CTTGGGGGTGATATACCTCACTAAACTCCTTC                  | 19,79 |
| TAATGTGACTAAGCGTTAACTCCAAAGGAAAC                  | 21,31 |
| CAGCTATCCCATATTCGATGTAAGCGGACATC                  | 21,47 |
| TATGCGCCCGATATCCGTTCAAACCTAGGGGGC                 | 21,63 |
| TTCTGACCAAAGCTCATGAGAATTGTAAACAG                  | 21,79 |
| GAACAGCTTAGAGCAGTCAAGTTCGGATACGC                  | 23,31 |
| TACCTATGGACGGGATATGCGACACCATGAT                   | 23,47 |
| CCGGATGAGTTATGAAGATCGTCATTGGGATA                  | 23,63 |
| TACAATCTCGAAGTAAAGCATAGCACCTGCG                   | 23,79 |
| AAGATAGGGTCACAGCAGTAATACCTCTACCT                  | 25,31 |
| TGTTGGACGTAAGCGTGAATAACGACCAGAA                   | 25,47 |
| AGCACGAGGATTATCACGTGTACCTCGAAATA                  | 25,63 |
| ATCGTTAGTTTCTCGACTGTTCCGAAACAGGC                  | 25,79 |
| AGCGGTAGCCTCCCCTTAAACCTATGCCTTGG                  | 27,31 |
| TAACTGATTTTCTCCTGGTTCCGCTAGCTGAT                  | 27,47 |
| CTATGGTCCCTAATATAACCCTCGGAGGCAAG                  | 27,63 |
| GGGAGAGGGTGAACAGGCCACCTGGCTCGGG                   | 27,79 |
| GAGTGCCCCCTCGGCAGCCGCTCGGTTATAC                   | 29,31 |
| TCGTCAAAGCCTGCTTTCATAGCTAACCCGAT                  | 29,47 |
| TGTGCATTCCACGTGAGTCGTAATAAGCAA                    | 29,63 |
| ACGTGGGAGTGCCCGAGCGTCTGAGGTATGGT                  | 29,79 |
| TTACCCACTATGTTGTCTCAAGTGCTAACAGT                  | 31,31 |
| ACTAATTATCCATAACTGTGCACGTCAGGGAT                  | 31,47 |
| TCTCACCGGTGGCCGTTGCTACATCAGTTTCT                  | 31,63 |
| TTGCACTCCTGGGGAACTATACTTACGCACT                   | 31,79 |
| GGTTTGGAGGGATTAGGCAATTGCTAGGTTGC                  | 33,31 |
| ATTGTAGGCACAATTTTGGATTGATCAGATA                   | 33,47 |
| CATGGGCAATAAAGCTGTAGCCTGAGGCGCGC                  | 33,63 |
| AGCTGCACCGTGTACCTTGATATTGAGGGAC                   | 33,79 |
| ACCTCGTCATTGCGATAAACCATACTGAGGGC                  | 35,31 |
| AGTGGGCGAGATCGGCTAATCATTAGTGCTCC                  | 35,47 |
| CTTAGTTAGTTCATAGTTCATTAGGGGCGGAA                  | 35,63 |
| ATGGGCTGGTGCCCCACGTACAGTAACCAACC                  | 35,79 |
| CAACAGTTTAAAGCGTTACAGGCGGTTGAGACTCCATATCCCCATTATA | 0,23  |
| ACCCGAGCGAAAAGGCGACATGAAATAGGACAGCATCAGATCGCGATC  | 0,55  |
| AGCGAATTGCGGCCATATTTCCGCTACTCTGATCAGAAAACCGCTCAGC | 4,23  |
| ATGAACACGAGATGCGGATACTTTCCGGTTTGGGCTGATGGCTTCAT   | 4,55  |
| GTGGTGGCCCGCAACGCACCGAATATGCTCTCTATCTTACTCGAT     | 6,23  |
| GGGGTCACACAGCTAACTTTAGGCCAAAGGAG                  | 6,39  |

|                                                    |       |
|----------------------------------------------------|-------|
| CAGAGCCGAGTCTCTACTGAGTAAAGTGTGTCACCGTTCCCCGCTGC    | 6,55  |
| AACAGCATCTAGAAATCACGCGAGCTATGTAG                   | 6,71  |
| TATGATTGAGGTACAGGAAGTAAACAACCGTGAGTATGATTGAGCCACT  | 10,23 |
| GAGGGAACGTGGGACGATCCTTCCAACATCTC                   | 10,39 |
| GGCATCACCTAGCTATAACCTGGGTGCGTTGAGTTCGTACCATCCCT    | 10,55 |
| TAGTCCCGACCCCTTTCTTACGCGCTTGAAC                    | 10,71 |
| TTCTTAAAAACCTCGTCCAGGTCCTCCCGGT                    | 12,23 |
| CTAATATATGCGATCAAGCTGTTCTCCCGTC                    | 12,39 |
| CACCAGAATGGGTAAGACACTGACTTCCAGCT                   | 12,55 |
| CCAAGTCAAGTTTTGGTTCATCCGGTTACTTCG                  | 12,71 |
| AGCTTGGGATAGCCAGATAATAGTAGGATATGGGCGCATATGAGCTTT   | 14,23 |
| CGTTTGTCCAACCAAAAGATGTTCTTATGCTATCACATTAGAATATGG   | 14,55 |
| ATTACCGTGAAGCGTAGTATTAGCAAAAAGCCC                  | 16,23 |
| CGCACGGCCACCCCGCCAGTGAGCTCGACA                     | 16,39 |
| CGAGTCGTTTCAGTCGTAGCCCGGGTTCCGGT                   | 16,55 |
| ATCGACTATCGTTCGATCTTTCTCGTATATCA                   | 16,71 |
| GAACCTGAGAAGGAGTAAACAGTCCGGAAGGAC                  | 18,23 |
| GTCGCTGGGCGTATCCGGGCACTCAAAGCAGG                   | 18,39 |
| TGACGATCCAGAAGTGGCCGGAGTAGACGTGC                   | 18,55 |
| TTAGTGAGTATCCCAAAATGCACATCGGGCAC                   | 18,71 |
| AGTTTCTCTGTTTACGCGGGCCGCTGACAGACATCTTTTGGGGTCGT    | 20,23 |
| CTTACATCGCCCTCGCTACCGCTAGGAGAAA                    | 20,39 |
| AACTACTGGATGTCGCCAGCCGCGCGCAGGGCTCGACGGTTAATTTG    | 20,55 |
| AATTCTACTAATCACGACCATAAGTGTTCAC                    | 20,71 |
| TGGAGTTACGCAGGGTGAAGTCGGCGGGGATGA                  | 22,23 |
| GTCGCATAGTTTCTTCTATCTTACGCTTAC                     | 22,39 |
| GTTTGAACATCATGGTAAAGACTGTGCGAGAT                   | 22,55 |
| GCTATGCTGCCCCCTACTCGTGTTCGAGAAA                    | 22,71 |
| GTATTACTACCATAACAGATTGACTGCTCTA                    | 24,23 |
| AGCTATGGAGGTAGAGGACGAGGTGCCGATCTCGCCCACTCTATGAAAC  | 24,39 |
| GGTACACGATCGGGTTCATAGGTATTCATAAC                   | 24,55 |
| TCAGACGCTATTCGATAACTAAGTGGGGCACCCATATCCGAAT        | 24,71 |
| TAGGTTAAGCCTGTTTGGTTCAGAAAACGCTTAG                 | 26,23 |
| GTTATTTCCAAGGCATCCAAACCAAAATTGTGCCTACAATAGCTTTAT   | 26,39 |
| CGAGGGTTTTCTGGTTCGATAGCTGGGATATCG                  | 26,55 |
| CGGAACAGCTTGCCTCTGCCATGGTGACACGGTGCAGCTCTAATCCC    | 26,71 |
| GAGGCGGCCCCGAGCCCCCAAGGTATAGCG                     | 28,23 |
| GCGGAACCGTATAACCGTGGGTAAGTTATGGATAATTAGTACGGCCAC   | 28,39 |
| AGTACGACATCAGCTAGACAGGGACCACCGCA                   | 28,55 |
| AGGTGGCCTTGCTTACGGTGAGATTCCCCAGGAGTGCAAACAACATA    | 28,71 |
| CGTGACAGCCCTCAGTATGGTTTGTGCGTATCCCACGTTGCCGAGG     | 30,39 |
| AGTATAGTTTCCGCCCTAATGAAATCCCTGACTTGACGATCACGTGG    | 30,71 |
| CGAATCAAACCTGTTAGCACTTGAGGTCCCTCACCTCTCCCGTGGGAGG  | 32,39 |
| ATATCAAGAGAAAACCTGATGTAGCATATGTGATATCAGTTAATATTAAG | 32,71 |
| AATGATTAGCAACCTAGCAATTGCGGTTGGTTCTAACGATGCTGTGAC   | 34,39 |
| ACTGTACGGCGCCCTCAGGCTACGGAGCACTGTCCAACATGATAATC    | 34,71 |

### S3.6 ZX-32H×64B-cross-channel crystal sequences

|                                              |       |
|----------------------------------------------|-------|
| CCAGGTAAAGTGGCTC                             | 1,47  |
| AATCATACTCACGGTAACTGTTGTGTCCTAT              | 1,63  |
| GTTTACTTAGGGATGG                             | 4,32  |
| TACGAACTCAACGCACGCTCGGGTAGTCTCAA             | 5,47  |
| GAAGATAGAGAGCATAAATTCGCTAAACCGGA             | 5,63  |
| AAAGTATCCGCATCTCACTCAGTGATCGAGTA             | 7,47  |
| TTCATGTCGCCTTTTC                             | 7,63  |
| GAACGGTGACACACTT                             | 10,48 |
| GTGTTCAATTCAGAGTAGCGGAAATATGGCCGC            | 11,47 |
| TTCGGTGCAGCGGGCCGCTGTAAACGCTTA               | 11,63 |
| ATCAGCCCGGGCTTTTGCTAATACGCTGAGCG             | 13,31 |
| ATGCTGTTGTGCGGGGTTTCTGAACCGGAAC              | 13,47 |
| CCGGGCTAATGAAGCCGTGACCCAGAGACTG              | 13,63 |
| TCTGATGCACCGGGAGCCAGCCACTTAGCTGT             | 13,79 |
| GTCAGTGTGATCGCGAGTTCCCTCTAGCTAGG             | 15,31 |
| GTGATGCCAAAAGGGTGGATATGGAGCTGGAA             | 15,47 |
| CGGCTCTGATTCTAGTGACCTGGTATAATGG              | 15,63 |
| CGGAGCTACCTGACCTCAATCATACTGCCAC              | 15,79 |
| GGAAGGATTCATCCCTTTAAGAATGATCGCA              | 17,31 |
| CAGTCTTTGAGATGTTGAACATCTTTTGGTTG             | 17,47 |
| GCGTAAAGATCTCGCATTCTGGTGCCAAAAC              | 17,63 |
| GCCGACTCGTTCAAGCACTATTATCTGGCTAT             | 17,79 |
| AAAAGATGTCTGTCAGCCAAAGCTTAGCATAA             | 19,31 |
| GCGGCTGGACGACCCCGCCGTGCGACGACTGA             | 19,47 |
| CCGTCGAGCCCTGCGCGACAAAACGCATATCCT            | 19,63 |
| CGGCCCGCAAATTAATAGTCGATTACGCTTC              | 19,79 |
| GCCTAAAGGTCTTCCACGGTAATCGGGGGTG              | 21,31 |
| ACTCCGGCTCCTTGGTATATTAGCTTACCCA              | 21,47 |
| CTCGCGTGGCAGCTTACGACTCGTCGAACGA              | 21,63 |
| GGACTGTTCTACATAGTACTTGGACGAGGTT              | 21,79 |
| TCACTGGGCGCTATACAGGAAACTCGAGGGGC             | 23,31 |
| TCCCTGTCTGTGAGAGCCAGCGACCACTTCTG             | 23,47 |
| GAGAAAGATGCGGTGGCAGTAGTTGTGATTAG             | 23,63 |
| CTTGGGGGTGATATACCTCACTAAACTCCTTC             | 23,79 |
| TAATGTGACTAAGCGTTAACTCCAAAGGAAAC             | 25,31 |
| CAGCTATCCCATATTCGATGTAAGCGGACATC             | 25,47 |
| TATGCGCCGATATCCGTTCAAACCTAGGGGGC             | 25,63 |
| TTCTGACCAAAGCTCATGAGAATTGTAAACAG             | 25,79 |
| GAACAGCTTAGAGCAGTCAAGTTCCGGATACGC            | 27,31 |
| TACCTATGGACGGGGATATGCGACACCATGAT             | 27,47 |
| CCGGATGAGTTATGAAGATCGTCAATTGGGATA            | 27,63 |
| TACAATCTCGAAGTAAAGCATAGCACCTGCG              | 27,79 |
| AAGATAGGGTCACAGCAGTAATACCTCTACCT             | 29,31 |
| TGTTGGACGTAAGCGTGAAATAACGACCAGAA             | 29,47 |
| AGCAGGAGATTATCACGTGTACCTCGAAATA              | 29,63 |
| ATCGTTAGTTTCTCGACTGTTCCGAAACAGGC             | 29,79 |
| AGCGGTAGCCTCCCACTTAACCTATGCCTTGG             | 31,31 |
| TAACCTGATTTTCTCCTGGTTCCGCTAGCTGAT            | 31,47 |
| CTATGGTCCTTAATATAACCCTCGGAGGCAAG             | 31,63 |
| GGGAGAGGGTGAAACAGGCCACCTGGCTCGGG             | 31,79 |
| GAGTGCCCCCTCGGCAGCCGCTCGGTTATAC              | 33,31 |
| TCGTCAAGCCTGCTTCCATAGCTAACCCGAT              | 33,47 |
| TGTGCATTCCACGTGAGTCGTAATAAGCAA               | 33,63 |
| ACGTGGGAGTGCCCGAGCGTCTGAGGTATGGT             | 33,79 |
| TTACCCACTATGTTGTCTCAAGTGCTAACAGT             | 35,31 |
| ACTAATTATCCATAACTGTGCACGTCAGGGAT             | 35,47 |
| TCTACCCGGTGGCCGTGCTACATCAGTTTCT              | 35,63 |
| TTGCACTCCTGGGGAAACTATACTTACGCACT             | 35,79 |
| CAACAGTTTTGAGACTACCCGAGCTTTTTTTTTTACTCTGA    | 0,55  |
| TTTTTTTTTAAGGACAGCACCGAATTTTTTTT             | 0,71  |
| TTTTTTTTTGAGCCACT                            | 1,24  |
| AGCGAATCCATCCCTAAGTAAACTTTTTTTTTTTTGGATGCG   | 4,55  |
| TTTTTTTTTCCGGTTTGACATGAATTTTTTTT             | 4,71  |
| TTTTTTTTGTGCGTTG                             | 5,24  |
| CACTGAGTTTTTTTTTATCCTTCCAACATCTC             | 6,39  |
| ACAGCGGTACTCGATAGTTCGTATATGCTCTCTATCTTTTTTTT | 6,55  |

|                                                    |       |
|----------------------------------------------------|-------|
| TTTTTTTTTAAGCGTTCCTTACGCGCTTGAAC                   | 6,71  |
| ATTTCCGCTTTTTTTGGGCTGATCCCGCAAC                    | 10,39 |
| CACCGTTCGCGGCCATTAACCTGGAACCGTGAGTATGATTTTTTTTT    | 10,55 |
| TTTTTTTTAAGTGTGTTAGCCCGGCTCCCGGT                   | 10,71 |
| GTATTAGCATAGCCAGATAATAGTCAGTCTCTTCTTTCTCGTATATCA   | 12,23 |
| AGATGTTCCGCTCAGCCCCAGTGAGCTCGACA                   | 12,39 |
| GGGGTCACCAACCAAAATGAACACCCCGCTGC                   | 12,55 |
| GAGGGAACACAGCTAAGTGGCTGGCCATTATACACGCGAGCTATGTAG   | 14,23 |
| CCAGGTCAAGTTCGCGTTCAGAAACCCCTAGCTACTTTAGGCCCAAGGAG | 14,55 |
| TTCTTAAAGTGGGACGTATGATTGAGTTTTGGCTCGACGGTTAATTG    | 16,23 |
| CCATATCCTGCGATCACATCTTTTGGGGTCTG                   | 16,39 |
| CACCAGAATTCCAGCTGATACTTTGAAAAGGC                   | 16,55 |
| AGTTTCCTGAAGCGTAGAGTCGGCGGGGATGA                   | 18,23 |
| CGCACGGCGCCCCTCGCCTATCTTACGCTTAC                   | 18,39 |
| AACTACTGTCAGTCGTAAGACTGTGCGAGAT                    | 18,55 |
| ATCGACTACTAATCACCTCGTGCTTCGAGAAA                   | 18,71 |
| AGCTTGGGAACCTCGTTAGCTCCGTCGCGATCACACTGACACCCTTTT   | 20,23 |
| CTAATATATTATGCTAAGCTGTTCTCCCCGTC                   | 20,39 |
| CGTTTGTCTGGGTAAGGGCATCACCTAGAAATCAGAGCCGAGGTCAGG   | 20,55 |
| CCAAGTCAAGGATATGTCATCCGGTTACTTCG                   | 20,71 |
| ATTACCGTGAAGGAGTGCATCAGAAAAAGCCC                   | 22,23 |
| GTCGCTGGCACCCCGTCACATTAGAATATGG                    | 22,39 |
| CGAGTCGTCAGAAGTGAACAGCATGGCTTCAT                   | 22,55 |
| TTAGTGAGTCGTTGAGGGCGCATATGAGCTTT                   | 22,71 |
| TGGAGTTAGCCTGTTCCCCCAAGGTATAGCG                    | 24,23 |
| GTTATTTCTGTTCTTGTGGGTAAGTTATGGATAATTAGTACGGCCAC    | 24,39 |
| GTTTGAACCTTCTGGTCGACAGGGACCACCGCA                  | 24,55 |
| CGGAACAGGCCCCCTACGGTGAGATTCCCAGGAGTGCAAACAACATA    | 24,71 |
| GAACCTGACTGTTTACAACAGTCCGGAAGGAC                   | 26,23 |
| CTTACATCGCGTATCCGGGCACTCAAAGCAGGCTTGACGATCACGTGG   | 26,39 |
| TGACGATCGATGCCGGCCGAGTAGACGTGC                     | 26,55 |
| AATTCTCATATCCCCAAAATGCACATCGGGCACTCCCACGTTGCCGAGG  | 26,71 |
| GTATTACTCGCAGGGTGCGGGCCGCTGACAGA                   | 28,23 |
| GTCGCATAAGGTAGAGCTACCGCTAGGAGAAAATCAGTTAATATTAAG   | 28,39 |
| GGTACACGATCATGGTCCAGCCGCGCGCAGGG                   | 28,55 |
| GCTATGCTTATTTCGAGACCATAGTGTTCACCTCTCCCGTGGGAGG     | 28,71 |
| GCGGAACCACTGTTAGCACTTGAGCCCGAGCCCTAACGATGCTGTGAC   | 30,39 |
| AGGTGGCCAGAACTGATGTAGCAATCAGCTAGTCCAACATGATAATC    | 30,71 |
| AGCTATGGCCAAGGCATAGGTTAAACCATAACAGATTGTAAGTCTTA    | 32,39 |
| TCAGACGCCTTGCCCTCCGAGGGTTATCGGGTTCATAGGTATTCATAAC  | 32,71 |
| CGTGCACAGTATAACCGAGGCGGCAGTGCGTAGGTCAGAAACGCTTAG   | 34,39 |
| AGTATAGTTTCTTTAAGTACGACATCCCTGAGATAGCTGGGATATCG    | 34,71 |



### S3.7 ZX-6H×6H×64B-pore crystal sequences

|                                                   |       |
|---------------------------------------------------|-------|
| CCAGGTAAAGTGGCTCAATCATACTCACGGTT                  | 1,31  |
| AACGTGTGTGTCCTATGTTACTTAGGGATGG                   | 1,47  |
| TACGAACTCAACGCACGCTCGGGTAGTCTCAAGAAGATAGAGAGCATA  | 1,79  |
| AATTCGCTAAACCGGAAAAAGTATCCGCATCTC                 | 3,47  |
| ACTCAGTGATCGAGTATTCATGTCGCCTTTTC                  | 3,63  |
| GAACGGTGACACACTTGTGTTTCATTCAGAGTA                 | 5,31  |
| GCGGAAATATGGCCGCTTCGGTGCAGCGGG                    | 5,47  |
| CCGCCTGTAACGCTTAATCAGCCCGGGCTTTTGCTAATACGCTGAGCG  | 5,63  |
| ATGCTGTTGTTGCGGGGTTTCTGAACCGGAAC                  | 5,79  |
| CCGGGCTAATGAAGCCGTGACCCAGAGACTGTCTGATGCACCGGGAG   | 7,31  |
| CCAGCCACTTAGCTGTGTGTCAGTGTGATCGCGA                | 7,47  |
| GTTCCCTCTAGCTAGGGTGATGCCAAAAGGGT                  | 7,63  |
| GGATATGGAGCTGGAACGGCTCTGATTTCTAG                  | 9,47  |
| TGACCTGGTATAATGGCGGAGCTACCTGACCT                  | 9,63  |
| CAATCATACTGCCACGGAAGGATTCATCCCC                   | 11,31 |
| TTAAGAATGATCGCACAGTCTTTGAGATGTT                   | 11,47 |
| GAACATCTTTTGGTTGGCGTAAAGATCTCGCA                  | 11,63 |
| TTCTGGTGCCAAAAGTCCGACTCGTTCAAGCACTATTATCTGGCTAT   | 11,79 |
| AAAAGATGTCTGTCAGCCCAAGCTTAGCATAA                  | 13,31 |
| GCGGCTGGACGACCCCGCGTGCAGCAGCTGA                   | 13,47 |
| CCGTCGAGCCCTGCGCGACAAACGCATATCCTCGGCCCGCCAAATTA   | 13,79 |
| TAGTCGATTACGCTTCGCCTAAAGGTCCTTCC                  | 15,47 |
| ACGGTAATCGGGGGTGAATCCGGCCTCCTTGG                  | 15,63 |
| TATATTAGCTTACCCACTCGCGTGGCAGTCT                   | 17,31 |
| ACGACTCGTCAACGAGGACTGTTCTACATAG                   | 17,47 |
| TGACTTGGACGAGGTTTACTGGGCGTATACAGGAACTCGAGGGGC     | 17,63 |
| TCCCTGTCTGTGAGCCGACGACCACTTCTG                    | 17,79 |
| GAGAAAGATGCGGTGGCAGTAGTTGTGATTAGCTTGGGGGTGATATAC  | 19,31 |
| CTCACTAAACTCCTTCTAATGTGACTAAGCGT                  | 19,47 |
| TAACCTCAAAGGAAACCAGCTATCCCATATTC                  | 19,63 |
| GATGTAAGCGGACATCTATGCGCCCGATATCC                  | 21,47 |
| GTTCAAAGTGGGGGCTTCTGACCAAAGCTCA                   | 21,63 |
| TGAGAATTGTAACAGGAACAGCTTAGAGCAG                   | 23,31 |
| TCAAGTTCGGATACGCTACCTATGGACGGGGA                  | 23,47 |
| TATGCGACACCATGATCCGGATGAGTTATGAA                  | 23,63 |
| GATCGTCATTGGGATATACAATCTCGAAGTAAAGCATAGCACCCCTGCG | 23,79 |
| AAGATAGGGTCACAGCAGTAATACCTCTACCT                  | 25,31 |
| TGTTGGACGTAAGCGTGAATAACGACCAGAA                   | 25,47 |
| AGCACGAGGATTATACGTTACCTCGAAATAATCGTTAGTTTCTCGA    | 25,79 |
| CTGTTCCGAAACAGGCAGCGGTAGCCTCCAC                   | 27,47 |
| TTAACCTATGCCTTGGTAACTGATTTCTCCT                   | 27,63 |
| GGTTCCGCTAGCTGATCTATGGTCCTTAATAT                  | 29,31 |
| AACCTCGGAGGCAAGGGGAGAGGGTGAAACA                   | 29,47 |
| GGCCACCTGGTCCGGGAGTGCCCTCGGCAGCCGCCTCGGTTATAC     | 29,63 |
| TCGTCAAGCCTGCTTTCATAGCTAACCCGAT                   | 29,79 |
| TGTGCATTCCAGTGAGTCGTACTTAAAGCAAACGTGGGAGTGCCCGA   | 31,31 |
| GCGTCTGAGGTATGGTTTACCCACTATGTTGT                  | 31,47 |
| CTCAAAGTGCTAACAGTACTAATATCCATAAC                  | 31,63 |
| TGTGCACGTCAGGGATTCTCACCAGTGGCCGT                  | 33,47 |
| TGCTACATCAGTTTCTTTCGACTCCTGGGGAA                  | 33,63 |
| ACTATACTTACGCACTGGTTTGGAGGGATTAG                  | 35,31 |
| GCAATTGCTAGGTTGCATTGTAGGCACAATTT                  | 35,47 |
| TTGATTCGATCATAATGCGCAATAAAGCT                     | 35,63 |
| GTAGCCTGAGGCGCGCAGCTGCACCGTGTACCTTGATATTGAGGGAC   | 35,79 |
| GTATGATTGTTCCGGTTCCAGAACTATGCTCTAGATGTTTCAGTTTGG  | 0,23  |
| CTATCTTCCCGCTGCGCACCGAAAAACCGTGATATGATTGTGCGATCA  | 0,55  |
| GACATGAACCATCCCTAAGTAAACTTTTTTTTTTTTTTTTCCAGCT    | 2,55  |
| TTTTTTTTGAAAAGGCCAGGTCATTTTTTTTT                  | 2,71  |
| TTTTTTTTTCCGGTTT                                  | 3,24  |
| ATGAACACCGCTCAGCGTATTAGCAAAAAGCCCGAGGGAACCAGTCTCT | 4,23  |
| GGGCTGATGAGATGCGGATACTTTTACTCTGATAGCCCGGACAGCTAA  | 4,55  |
| ATCCTTCCCTCCCGGTAACAGCATAAGTGTGCACCGTTCGCGGCCAT   | 6,23  |
| ACACTGACGGGGATGACTAATATATCGTTTCGA                 | 6,39  |
| CTTTACGCTCGCGATCATTCCGCTAAGCGTTACAGGCGCCCGCAAC    | 6,55  |
| GCATCAGATGCGAGATCCAAGTCAGCTCGACA                  | 6,71  |
| CAGAGCCGTTTTTTTTTTTTTTTTTTGAAGCGTA                | 8,39  |

|                                                   |       |
|---------------------------------------------------|-------|
| GGCATCACCTAGAAATAGCGAATTACTCGATCACTGAGTTTTTTTT    | 8,55  |
| TTTTTTTTACCCTTTTATTACCGTTTTTTTT                   | 8,71  |
| ATAATAGTGCTTGAACAGTTCGTAGAGCCACTTAACCTGGATAGGACA  | 10,23 |
| AAAGACTGATAGCCAGCATCTTTTGGGGTCGT                  | 10,39 |
| TAGCTCCGAACATCTCCAACAGTTTTGAGACTACCCGAGCGTGCGTTG  | 10,55 |
| GAGTCGGCAGGTCAGGCGTTTGTGCGGCAGG                   | 10,71 |
| AGCTTGGGCAGAAGTGCACCAGAAGTGGGACG                  | 12,23 |
| AACAGTCCTTATGCTAAATTCTCAGCGTATCC                  | 12,39 |
| GCGGGCCGCTATGTAGTTCTTAAACAACCAA                   | 12,55 |
| GTCGCTGGTTAATTTGGTCGCATATATCCAA                   | 12,71 |
| CGCACGGCTTTTTTTTTTTTTTTTGATGTCCG                  | 14,39 |
| GCCGGAGTTCAGTCGTCCATATCCCATTATA                   | 14,55 |
| TTTTTTTTCCAAGGAGTTTGAACTTTTTTTT                   | 14,71 |
| CACGCGAGGCCCTCGGGGGTACGGCTTCAT                    | 16,23 |
| CTTAGGCAGACGTGCTCTTCTCGAAGGAGT                    | 16,39 |
| CCCAGTGAGGAAGGACGTGGCTGGCCTAGCTA                  | 16,55 |
| AGTTTCTGTATAGCGTGGAGTACTAATCAC                    | 16,71 |
| AGCTGTTCGTATATCAGACAGGATGGGTAAG                   | 18,23 |
| TCACATTACTGCTCTAGCGGAACCTTGCCTC                   | 18,39 |
| TCATCCGGACGCTTAGCGAGTCGTAACCTCGT                  | 18,55 |
| CCCCAAGTTCATAACAGGTGGCCAAAGCAGG                   | 18,71 |
| GGCGCATATTTTTTTTTTTTTTTTGCCTGTT                   | 20,39 |
| GATAGCTGGGATATCGATCGACTACACCCCG                   | 20,55 |
| TTTTTTTTGAATATGGTAGGTTAATTTTTTT                   | 20,71 |
| GCTATGCTTACTTCGCTCGACGGCTGACAGA                   | 22,23 |
| CATAGGTACGCAGGGTCTATCTTACGCTTAC                   | 22,39 |
| GGTCAGAATCCCCGTCCCAGCCGAGGATATG                   | 22,55 |
| AGATTGTATGAGCTTTGGTACACGTGATAATC                  | 22,71 |
| GTATTACTATCGGGTTGACGATCCTGTTTAC                   | 24,23 |
| CCTCTCCAGGTAGAGAGTATAGTGCAACCTAGCAATTGCTATGTGAT   | 24,39 |
| CTAACGATTGTTTCACGAACCTGAATCATGGT                  | 24,55 |
| AGCTATGGTCGAGAAAACGAATCAAGCGCGCCTCAGGCTACAGTGCCTA | 24,71 |
| GTTATTTCTTTTTTTTTTTTTTTTATCCCTGACGTGCACAAGAACTG   | 26,39 |
| ATCAGTTATCTGGTCCTTACATCGCCCCTA                    | 26,55 |
| TTTTTTTTAGGAGAAAATGTAGCATTTTTTT                   | 26,71 |
| GACCATAGGTATAACCAACTACTGCCACCGCA                  | 28,23 |
| CTACCGCTATATTAAGAATGCACAACCATACCTCAGACGCACTGTTAG  | 28,39 |
| GGGCACTCGTGGGAGGTTAGTGAGGTTTCCTT                  | 28,55 |
| GAGGCGGTGCCGAGGCACTTGAGTTGCTTAAAGTACGACTCACGTGG   | 28,71 |
| GTGGGTAACATAACCTCCAAACCTCGGGCACCTTGACGAATCAGCTA   | 30,39 |
| TCCCACGTAGCTTATTGCCCATGACAACATACGAGGGTTCCCGAGCC   | 30,71 |
| CGGTGAGATTTTTTTT                                  | 32,39 |
| TTTTTTTTGTTATGGATAATTAGTACGGCCACCGGAACAGCCAAGGCA  | 32,71 |
| CCTACAATGTCCCTCAATATCAAGGTGACACGCTCGTGCTGCTGTGAC  | 34,39 |
| GTGCAGCTTTCCCCAGGAGTGCAAAAATTGTGGTCCAACATATTCGA   | 34,71 |

### S3.8 ZX-96H×64B-cross-tunnel crystal sequences

|                                                   |       |
|---------------------------------------------------|-------|
| CCAGGTAAAGTGGCTCAATCATACTCACGGTT                  | 1,23  |
| AACTGTTGTGTCCATGTTTACTTAGGGATGG                   | 1,39  |
| TACGAACTCAACGCACGCTCGGGTAGTCTCAA                  | 1,55  |
| GAAGATAGAGAGCATAAATTCGCTAAAACCGGA                 | 1,71  |
| AAAGTATCCGCATCTCACTCAGTGATCGAGTA                  | 3,23  |
| TTCATGTCGCCTTTTCGAACGGTGACACACTT                  | 3,39  |
| GTGTTCAATCAGAGTAGCGGAAATATGGCCGC                  | 3,55  |
| TTCGGTGCAGCGGGCCGCTGTAACGCTTA                     | 3,71  |
| ATCAGCCCGGGCTTTTGCTAATACGCTGAGCG                  | 5,23  |
| ATGCTGTTGTTGCGGGGTTTCTGAACCGGAAC                  | 5,39  |
| CCGGGCTAATGAAGCCGTGACCCAGAGACTG                   | 5,55  |
| TCTGATGCACCGGGAGCCAGCCACTTAGCTGT                  | 5,71  |
| GTCAGTGTGATCGGAGTTCCTCTAGCTAGG                    | 7,23  |
| GTGATGCCAAAAGGGTGGATATGGAGCTGGAA                  | 7,39  |
| CGGCTCTGATTCTAGTGACCTGGTATAATGG                   | 7,55  |
| CGGAGCTACCTGACCTCAATCATACTGCCAC                   | 7,71  |
| GGAAGGATTCATCCCTTTAAGAAATGATCGCA                  | 9,23  |
| CAGTCTTTGAGATGTTGAACATCTTTTGGTTG                  | 9,39  |
| GCGTAAAGATCTCGCATTCTGGTGCCAAAAC                   | 9,55  |
| GCCGACTCGTTCAAGCACTATATCTGGCTAT                   | 9,71  |
| AAAAGATGTCTGTCAGCCCAAGCTTAGCATAA                  | 11,23 |
| GCGGCTGGACGACCCCGCGTGCAGCACTGA                    | 11,39 |
| CCGTCGAGCCCTGCGCGACAAAACGCATATCCT                 | 11,55 |
| CGGCCCGCCAAATTAATAGTCGATTACGCTTC                  | 11,71 |
| GCCTAAAAGTCTTCCACGGTAATCGGGGGTG                   | 13,23 |
| ACTCCGGCCTCCTGGTATATTAGCTTACCCA                   | 13,39 |
| CTCGCGTGGCACGCTACGACTCGTCGAACGA                   | 13,55 |
| GGACTGTTCTACATAGTGACTTGACGAGGTT                   | 13,71 |
| TCACTGGGCGCTATACAGGAAACTCGAGGGGC                  | 15,23 |
| TCCCTGTCTGTCGAGCCAGCGACCACTTCTG                   | 15,39 |
| GAGAAAGATGCGGTGGCAGTAGTTGTGATTAG                  | 15,55 |
| CTTGGGGGTGATATACCTCACTAAACTCCTTC                  | 15,71 |
| TAATGTGACTAAGCGTAACTCCAAAGGAAAC                   | 17,23 |
| CAGCTATCCCATATTTCGATGTAAGCGGACATC                 | 17,39 |
| TATGCGCCCGATATCCGTTCAAACCTAGGGGGC                 | 17,55 |
| TTCTGACCAAAGCTCATGAGAATTGTAAACAG                  | 17,71 |
| GAACAGCTTAGAGCAGTCAAGTTCGGATACGC                  | 19,23 |
| TACCTATGGACGGGATATGCGACACCATGAT                   | 19,39 |
| CCGGATGAGTTATGAAGATCGTCATTGGGATA                  | 19,55 |
| TACAATCTCGAAGTAAAGCATAGCACCTGCG                   | 19,71 |
| AAGATAGGGTACAGCAGTAATACCTCTACCT                   | 21,23 |
| TGTTGGACGTAAGCGTGAAATAACGACCAGAA                  | 21,39 |
| AGCACGAGGATTATCACGTGTACCTCGAAATA                  | 21,55 |
| ATCGTTAGTTTCTCGACTGTTCCGAAACAGGC                  | 21,71 |
| AGCGGTAGCCTCCCACTTAACCTATGCCTTGG                  | 23,23 |
| TAACTGATTTTCTCCTGGTTCGCTAGCTGAT                   | 23,39 |
| CTATGGTCCCTAATATAACCCTCGGAGGCAAG                  | 23,55 |
| GGGAGAGGGTGAAACAGGCCACCTGGCTCGGG                  | 23,71 |
| GAGTGCCCCCTCGGCAGCCGCTCGGTTATACTCGTCAAGCCCTGCTTT  | 25,39 |
| CCATAGCTAACCCGATTGTGATTCCACGTGAGTCGTAATAAGCAA     | 25,71 |
| ACGTGGGAGTGCCCGAGCGTCTGAGGTATGGTTTACCCACTATGTTGT  | 29,23 |
| CTCAAGTGCTAACAGTACTAATATCCATAAC                   | 29,39 |
| TGTGCAGTCAAGGATTCTACCCGTTGGCCGTTGCTACATCAGTTTCT   | 29,55 |
| TTGCACTCCTGGGGAAACTATACTTACGCACT                  | 29,71 |
| GGTTTGGAGGGATTAG                                  | 31,23 |
| GCAATTGCTAGGTTGCATTGTAGGCACAATTTTTGATTTCGATCACATA | 31,55 |
| CATGGGCAATAAAGCTGTAGCCTGAGGCGCGC                  | 31,71 |
| AGCTGCACCGTGTCAC                                  | 34,8  |
| CTTGATATTGAGGGACACCTCGTCATTTCGGAT                 | 35,23 |
| AAACCATACTGAGGGCAGTGGGCGAGATCGGCTAATCATTAGTGCTCC  | 35,39 |
| CTTAGTTAGTTCATAGTTCATTAGGGGCGGAA                  | 35,55 |
| ATGGGCTGGTGCCCACTACAGTAAACCAACC                   | 35,71 |
| GGTGTACCTGTGGGTAGGGCCGAGCGCTGGGC                  | 37,23 |
| TTACATGTGCAAGTGAAATATATGACTTGGTC                  | 37,39 |
| GACCAGATCTGCTAGAAAACCAACATCCTC                    | 37,55 |
| CTTGACACCTTTCAATTTTAGTAAACACCCA                   | 37,71 |

|                                    |       |
|------------------------------------|-------|
| ACAGAGCTGAACTTCCCATGGTCGTTCTACTG   | 39,23 |
| TCGTATGATCATAGGATCAAACTAAATACAGC   | 39,39 |
| GTACCGCCAGTTCCTGTCCCTATTGGCGATCG   | 39,55 |
| TGCATTCCAATGTTTGATGCCCGGTGGCTTA    | 39,71 |
| TTAAGACGGCCGGTGTAAACCACATAAAGTCGT  | 41,23 |
| CCGCCTCCGGTAGTCAACGCGGAACGTAATGG   | 41,39 |
| CAGAAAGTCTATACCCGACAAAAACAGATTTG   | 41,55 |
| TACCGGGGTGAACAGCACGTGCGGCTTCTCCT   | 41,71 |
| GTATCGCCTTGTGTATTATACTCTTGCGGGGG   | 43,23 |
| GGTCGAGCGCTCCACTGTAGTGGCCGGCCATC   | 43,39 |
| GTGGACTAGAAAAGCGCCGGCAATCTGAATATC  | 43,55 |
| GCTACCTCCGATACGCGAACCAGAACCATTTA   | 43,71 |
| AGAGTAGGGGCAGTGCTCAGCCAAACAGTGGG   | 45,23 |
| ACATCTCGGAAAGGTGTCCCAAGTGCAAGTAA   | 45,39 |
| AAAAGGAATTATGAGATCATGTGGGATCCTAA   | 45,55 |
| AGTTTCTGGTAGACCTCGTAGGGTAGAGCGGT   | 45,71 |
| GATATCCACGGTACATTCGTTTACTGCACGGA   | 47,23 |
| ACGAGAGTGCTGGCATAAGCAAGAGAAAACCTA  | 47,39 |
| ACTTGGGGACTAAGATCGTTGCGAATTTTCGC   | 47,55 |
| GCGATTTCGCATGTAGCCGAACGAGATCGTCCT  | 47,71 |
| AGACGACGGATCTCCTGCATGCCGGTAGCACC   | 49,23 |
| GTCAAATATGCGTGCTTTTAAACGTTTAGACC   | 49,39 |
| CAGCTTGACGCAAGACGCTAATCACTGGGCAG   | 49,55 |
| GGTCCTAGGTTGCAGAAAACCTACCCCTAAGC   | 49,71 |
| AGCGTAGTAAGGGTTACAAGTTCCTGCGGCGG   | 51,23 |
| CTGTACGAATGAGTCCGGCCTTGACATGACAT   | 51,39 |
| TCTCCACCCGTCCAACACCAGCAGGATGTCG    | 51,55 |
| AGCCCAAACTTGACAGTAGTACAGTATCTTT    | 51,71 |
| TTTCATGGCGGCGATGTGCCGTTTGCTCGCG    | 53,23 |
| TGCGTACGGCTTTTATATAGCGTAGACCCGGAC  | 53,39 |
| AACCCCGTAAATCGTAAGAGTCGTTATGCCCC   | 53,55 |
| CCGGTCTGCTAGAGTGGGACTGGATCAGATG    | 53,71 |
| TTCAAGTATTCGGTGACCTCCCCGCATTACAA   | 55,23 |
| CGCGCTACCAAGTAACGTATGTACGACGCGA    | 55,39 |
| TGCGAGTGAACGGGTGGATGAATTTTCGTTTCGG | 55,55 |
| GGCCAGGCGATCTAAGTCTGGCGCGTGAGGAC   | 55,71 |
| ACGTAAGTTGAAGTAGGAAGCTTTTCTAGCC    | 57,23 |
| ATAGCATCGACACTACGACCTGCTTTTCGACA   | 57,39 |
| CGGACTGCATTCTGGACAGTAACTGCATTAAC   | 57,55 |
| TACGTGCTCCCAACATAAGTGACGTCTCAGC    | 57,71 |
| AGTTGAAAATTATCTCGATAAGCAGAAGGACC   | 59,23 |
| TGTATAACTGGCAAGAGACAAGGCCGCTTCAG   | 59,39 |
| AAAGGATAGCCGGACCGTATTAATGCCGCGCC   | 59,55 |
| AACGGTTTCCCGGACCTAGTGTCTATCAAGTC   | 59,71 |
| TATTCTATTTTTTTTTTTTTTTTTTGAACCAT   | 61,23 |
| TCTCGGGTCGAGCGGGTCACTGTTGTGACCTA   | 61,39 |
| CGAGAAGCGTATAGATGTTCCGCGCGAATAGC   | 61,55 |
| TCACAGGCTTTTTTTTTTTTTTTTGAACCTACG  | 63,23 |
| TATGAATGGTTTAAACGCTCCTCGGGAATTA    | 63,39 |
| ATACGACAGGTGGCAAACCACTCCGATGTCA    | 63,55 |
| GCGCCGCATTTTTTTTTTTTTTTTTACCCATT   | 65,23 |
| CACTGTGAATTTCCACACCGAGGATTCGCAGG   | 65,39 |
| TCCATGGGATTCACCAAGCTCGTATACACCT    | 65,55 |
| GATTCCTTTTTTTTTTTTTTTTTTATGGCAGC   | 67,23 |
| GCTTCGGTACAGGTCTGAACTGGTAGATCACC   | 67,39 |
| ATTAGTGTACCCAGCAGTTCGGCTCCCTTGTG   | 67,55 |
| GACTCGGGTTTTTTTTTTTTTTTTTATAACCCGG | 69,23 |
| TCGTCGTGTAATGCTGTTCCGGGGTAAATCAA   | 69,39 |
| GCTTTATAAATTCCCGACGCTCTGTTCCAAAC   | 69,55 |
| TTTAGAGCTTTTTTTTTTTTTTTTCCGGCCGT   | 71,23 |
| AATCTCGGATTCCTTAAAAACCAGGCGCAATC   | 71,39 |
| TCATGGCATAAACGAAACCAATCATAACGAGC   | 71,55 |
| GTGGAGGGTTTTTTTTTTTTTTTTTAAAGTIAT  | 73,23 |
| CTACTGGCGTTTTTCATATATCAGAGAGCACAG  | 73,39 |
| TAATTCGGAGCCCGCGTATTATCGCGTCAAT    | 73,55 |
| TCATATGGTTTTTTTTTTTTTTTTTACACACCA  | 75,23 |
| GATTACGGCGGCTTAGGGGAATTGAGTACAAG   | 75,39 |
| TGACGAAGAATACCGTCCATCAGATGGAGCTG   | 75,55 |

|                                                   |       |
|---------------------------------------------------|-------|
| TCAGGCTTTTTTTTTTTTTTTTTCTCCGTC                    | 77,23 |
| AAATGTTGGCTGAGATTGATTGGTTTAGTGTA                  | 77,39 |
| TAGCGAGTAAGAGATATGTGGGAGGATCATA                   | 77,55 |
| CAGGATCATTTTTTTTTTTTTTTAAGTTGAC                   | 79,23 |
| TAGCAGAATAATTTGCATCCGAATAAGGTACG                  | 79,39 |
| CAATFACTATTTGTACCGAAAAACAAGGGCATA                 | 79,55 |
| CAGTAACGAAAAGCGAACGAGCCACCACCTAG                  | 81,23 |
| CACCTCTGTAGGGTGACACCCGGGATGGGT                    | 81,39 |
| TGTCATCGGTCACCCAGTTTTCGCTTGAGG                    | 81,55 |
| AATAGTCCAAGAAATGCATGATAAAAGTTGTG                  | 81,71 |
| CCGCACTGGAATCTGAAGATGCACCGTTCTC                   | 83,23 |
| GAGACTCATTTACTGCTCGGTAGACCATGT                    | 83,39 |
| CTCCAGTATTGCCATTTCTAATTAATACTTT                   | 83,55 |
| TAATATAATGTCCGCGGATCAGCGAATTCGAC                  | 83,71 |
| ACAATGGTATCTTTGAAGCGCACGTAAACCG                   | 85,23 |
| CTTGCCCTGGGCCAATACTTTGTGGTCCACTAT                 | 85,39 |
| ATATAGGTCGACACCCAGCTCCCAGGTAAGT                   | 85,55 |
| GCGGAGAGAAATGGCTAATGGTCGACAATATG                  | 85,71 |
| TATTAAGTTTTCGCCGTGAGCGATCAATGACC                  | 87,23 |
| CCAGTAATAGCCTGAACACCCTGCATCGACGG                  | 87,39 |
| CTTCTACCTCTTAATGTATAATTCATCCTGTG                  | 87,55 |
| CATGGAAGCAGAGTTCCCATCGGCAAAATTGA                  | 87,71 |
| GTTACCGCTATAATTAAGAACATTCGGGTTCG                  | 89,23 |
| ACGTGGTCTATGTATCGCCTAGGCTAACCTC                   | 89,39 |
| ATGACTCCAGGAGAGGGGTGAGCTCCTACGTGG                 | 89,55 |
| AAGTGTTAATGCCGAGATCTAACTTGATTTTT                  | 89,71 |
| ATTCAGAATCGAGACCTTGCTTTGGACGTCT                   | 91,23 |
| CATTCTATAGCCCGGGTACTAGGGCGCCTTG                   | 91,39 |
| CTCCTACGCTCAATAGTGAACCTTACTATCG                   | 91,55 |
| CGACAGGATAGGTCAAAAATAACGATACTTAA                  | 91,71 |
| AGCTCTAGAGGGGAACCGTAGACTTCACATAA                  | 93,23 |
| AAAACACTCGGCGAGTGTCTAGGGAGCGGGG                   | 93,39 |
| ATGGTACACCCAGCATTCTTCAGTCCGCCTA                   | 93,55 |
| CTCATGATCTTTGATATTCTCCAAATGGATA                   | 93,71 |
| GGGCGTAAACAAAAAACTTGCCATCGTGCCC                   | 95,23 |
| TCATACAGCATTGTCTACCACCTATGTTCTTA                  | 95,39 |
| TGCTGTAAACATAGATCGTCGGGCGACCTCG                   | 95,55 |
| TAAGGTGGGGCCGACCACCGACCAAGGGCGCTA                 | 95,71 |
| TAGGTATACTCGTAAGCGATATCTGAATGCG                   | 97,23 |
| TAATACGAAACGACAAAAAATACCTTCGCCGG                  | 97,39 |
| TCCGTCCGTTGGAGCCACGAACCAACGCATC                   | 97,55 |
| CTTAGTGCTGTAGTTTACCATTACCGGAGGCG                  | 97,71 |
| CATTAGGTCTATTATAATGGGACGCCACTACG                  | 99,23 |
| TATCGTTCTATAAAATGGCACTGTCACGGCGC                  | 99,39 |
| CTTTCAGTGTGAGTGTGATGACCTCGCAGCCT                  | 99,55 |
| GGCACAGCTTGCCGATATATCATCTACAATGT                  | 99,71 |
| GTATGATTATAGCCAGATAATAGTTTGAGACTTCATCCGGTACTTCG   | 0,15  |
| ACCCGAGCAACCAAAAGATGTTCAACCGTGAAGCTGTTCTCCCCGTC   | 0,47  |
| CACTGAGTTCGGTTTAGCGAATTGCGGCCATGGCGCATATGAGCTTT   | 2,15  |
| ATTTCCGCCATCCCTAAGTAAACTACTCGATTACATTAGAATATGG    | 2,47  |
| GTATTAGCTAAGCGTTACAGGGCGCAGTCTCTTTCTCGTATATCA     | 4,15  |
| GGGGTCAACAAGTGTGTCACCGTTCCGCTCAGCCCCAGTGAGCTCGACA | 4,47  |
| GAGGGAACACAGCTAAGTGGCTGGCCATTATACACGCGAGCTATGTAG  | 6,15  |
| CCAGGTCAGTTCGGTTCAGAAACCCTAGCTACTTTAGGCCCAAGGAG   | 6,47  |
| TTCTTAAAGTGGGACGTATGATTGAGTTTTGGCTCGACGGTTAATTG   | 8,15  |
| CACCAGAATTCCAGCTCCATATCCTGCGATCACATCTTTGGGGTCGT   | 8,47  |
| GAACCTGAGAAGCGTAGAGTCGGCGGGGATGAATCCTTCCAACATCTC  | 10,15 |
| CGCACGGCGGTATCCTCCCACGTAAGTTAG                    | 10,31 |
| TGACGATCTCAGTCGTAAGACTGTGCGAGATCTTTACGGCTTGAAC    | 10,47 |
| ATCGACTATATCCCAACGTGCACATTCGCCAG                  | 10,63 |
| AGCTTGGGAACCTCGTTAGCTCCGTCGCGATCACACTGACACCCTTTT  | 12,15 |
| CTAATATATTATGCTA                                  | 12,31 |
| CGTTTGTCTGGGTAAGGGCATCACCTAGAAATCAGAGCCGAGGTCAGG  | 12,47 |
| CCAAGTCAAGGATATG                                  | 12,63 |
| GCCGGAGTAGACGTGC                                  | 13,32 |
| AACAGTCCGAAGGAC                                   | 13,64 |
| ATTACCGTGAAGGAGTGCATCAGAAAAAGCCGGGCTGATCCCGCAAC   | 14,15 |
| GTCGCTGGCACCCCGGAGGCGGCTGCCGAGG                   | 14,31 |

|                                                  |       |
|--------------------------------------------------|-------|
| CGAGTCGTCAGAAGTGAACAGCATGGCTTCATTAGCCCGGCTCCCGGT | 14,47 |
| TTAGTGAGTCGTTTCGAAATGCACAATCGGGTT                | 14,63 |
| AGTTTCTCTGTTTACGCACCGAAGAGATGCGGATACTTTGAAAAGGC  | 16,15 |
| CTTACATCGCCCTCGCTACCGCTAGGAGAAA                  | 16,31 |
| AACTACTGGATGTCGGACATGAATACTCTGAATGAACACCCCGCTGC  | 16,47 |
| AATTCTCACTAATCACGACCATAGTGTTCAC                  | 16,63 |
| TGGAGTTACGCAGGGTCTATCTTCGAGCCACTTAACCTGGATAGGACA | 18,15 |
| GTCGCATAGTTTCCCTTCCTATCTTACGCTTAC                | 18,31 |
| GTTTGAACATCATGGTCAACAGTTGTGCGTTGAGTTCGTATATGCTCT | 18,47 |
| GCTATGCTGCCCCCTACTCGTCTTCGAGAAA                  | 18,63 |
| GTATTACTAGTGCCTAAGATTGTACTGCTCTA                 | 20,15 |
| TAATTAGTAGGTAGAGAGCTCTGTTCCCTATGA                | 20,31 |
| GGTACACGGTTATGGACATAGGTATTATAAC                  | 20,47 |
| AGTATAGTTATTTTCGAGGCGGTACCAAACATT                | 20,63 |
| TAGGTTAAGCCTGTTTGGTCAGAAACGCTTAG                 | 22,15 |
| GTTATTTCCCAAGGCAGGTACACCTCACTTGC                 | 22,31 |
| CGAGGGTTTTCTGGTCGATAGCTGGGATATCG                 | 22,47 |
| CGGAACAGCTTGCCCTCATCTGGTCATTGAAAG                | 22,63 |
| CTTGACGACCCGAGCCCCCAAGGTATAGCG                   | 24,15 |
| GCGGAACCAAAGCAGGATATCAAGGCCCTCAG                 | 24,31 |
| AGTACGACATCAGCTAGACAGGGACCACCGCA                 | 24,47 |
| AGGTGGCCTTGCTTATAACTAAGTGGGGCAC                  | 24,63 |
| TCAGACGCAGAAACTGGCGGGCCGCTGACAGA                 | 28,15 |
| GTGGGTAAACCATACTCCAAACCAAATTGTG                  | 28,31 |
| CGGTGAGAACAAACATACCAGCCGCGCGCAGGG                | 28,47 |
| ATGTAGCAACGGCCACGCAATTGCAGCTTTAT                 | 28,63 |
| CGACCATGGCGCGCCTGAGTGCAATCGGGCAC                 | 30,15 |
| CGAATCAACAGTAGAACGTCGTCTAGCACGCA                 | 30,31 |
| AATAAGGATATGTGATCACTTGAGATCCCTGA                 | 30,47 |
| CAGGCTACCGATCGCCTCAAGCTGTCTGCAAC                 | 30,63 |
| GTGCAGCTGGTTGGTAGCTATGGGTATAACC                  | 34,15 |
| CGCCCACTGTGACACGCCTACTCTCACCTTTC                 | 34,31 |
| AATGATTAGCCGATCTGGGCACTCTCACGTGG                 | 34,47 |
| ACTGTACGGGAGCACTTTCCTTTTAGGCTAC                  | 34,63 |
| GACGAGGTTGGGTGTTCTCTCCCGTGGGAGG                  | 36,15 |
| CATATATTATCCGAATGGCGATACAGTGGAGC                 | 36,31 |
| CTAATGAAGACCAAGTATCAGTTAATATTAAG                 | 36,47 |
| TACTAAAATTCGCCCTAGTCCACGCGTATCG                  | 36,63 |
| CTCGGCCCTAAGCCACCTAACGATGCTGTGAC                 | 38,15 |
| TAGTTTGAGCCCAGCGCTTAAATGACTACC                   | 38,31 |
| TGGTGGTTGCTGTATTGTCCAACATGATAATC                 | 38,47 |
| GCGGCCATGAGGATGTACTTTCTGGCTGTCA                  | 38,63 |
| ATGTGGTTGCTTAGGGGAATGCAGGAAGTTC                  | 40,15 |
| GCGTTAAAACGACTTTTTTCAACTTCTTGCCA                 | 40,31 |
| TTTTTGTGCGTCTAAATCATAACGACAAGAACT                | 40,47 |
| GGTAGGTTCAAATCTGTATCCTTTGGTCCGGGAAACCGTTGAGATAAT | 40,63 |
| AGAGTATAAGGAGAAGGTGTCAAGTACCCACA                 | 42,15 |
| TTCCGCGTCCCCGCAACTTACGTGTAGTGTG                  | 42,31 |
| GATTGCCGCCATTACGACATGTAATCTAGCAG                 | 42,47 |
| CCGCACGTGATATCAGCAGTCCGATGTTGGGAGCACGTACTIONTCA  | 42,63 |
| TTGGCTGATAAATGGTACGCCATGTCCCTCA                  | 44,15 |
| GCCACTACCCCACTGTTACTTGAATTACTTGG                 | 44,31 |
| CCACATGAGATGGCCGTATGGTTTCTATGAAC                 | 44,47 |
| TCTGGTTCTTAGGATCCACTCGCACTTAGATCGCCTGGCCTCACCGAA | 44,63 |
| GTAACGAACCGCTCT                                  | 46,15 |
| TCGCAACGTTACTTGCCTTGGGATCCGTGCACCATGAAAATAAAAAGC | 46,47 |
| AGCCTACGGCGAAAATACGGGGTACTCTAGCAGAACCAGCATCGCCG  | 46,63 |
| CGGCATGCAGGACGATTGCCCATGCTAATCCC                 | 48,15 |
| TCTTGCTTGGTGCTACACTACGCTGGACTCAT                 | 48,31 |
| TGATTAGCTAGGTTTCCCTACAATGCAACCTA                 | 48,47 |
| CTCGTTTCGCTGCCAGGTGGGAGATGTCAAGTTGTGGGCTTAACCCTT | 48,63 |
| TGCTTATCAAAGATACCTAGGACCAGGAGATC                 | 50,15 |
| TCAAGGCCGGTCTTCCCCGAGTCCAGCATT                   | 50,31 |
| ATTAATACATGTCATGATTTGACGTCTTGCG                  | 50,47 |
| TGTACTACGGCGCGGCTATAAAGCTTTTTTTT                 | 50,63 |
| GGAACCTGCATCTGATCGAATCGCATGTACCGTGGATATCATGCCAGC | 52,15 |
| TACGCTATCCGCCGAGGAGAATCAGACCTGT                  | 52,31 |
| TGCTGGTGGTCCGGTCACTCTCGTATCTTAGTCCCCAAGTGCTACATG | 52,47 |

|                                                    |       |
|----------------------------------------------------|-------|
| CCAGTCCCCGACATCCACACTAATTTTTTTTT                   | 52,63 |
| AACGGCGAGTCCTCACCAGAACTGCACTGCC                    | 54,15 |
| TACATACGCGGAGCATGCGGCGGTGAAAT                      | 54,31 |
| ACGACTCTTCGCGTCGCGAGATGTTCTCATAA                   | 54,47 |
| GCGCCAGAGGGGCATAACCATGGATTTTTTTTT                  | 54,63 |
| CGGGGAGGGCTGAGGAGAGGTAGCATAACAAA                   | 56,15 |
| AGCAGGTCTTGTAATGGCCTGTGATTTAAACC                   | 56,31 |
| AATTCATCTGTCGAAAGCTCGACCGCGTTTC                    | 56,47 |
| CGTCACTTCCGAACGATGTCGATTTTTTTTT                    | 56,63 |
| AAAGCTTCGACTTGATCCCCGGTAAACCCGGC                   | 58,15 |
| GCCTTGTCGGCTAGAAATAGAATACCCGCTCG                   | 58,31 |
| AGTTACTGCTGAAGCGGGAGGCGGGGGTATAG                   | 58,47 |
| AGACACTAGTTAATGCGCTTTCGTTTTTTTT                    | 58,63 |
| CCCCGAAATGGTTTCTGATCCTGGCAAATTA                    | 60,31 |
| CGCGAACTTGATTAGTTATACAGGTCCGGC                     | 60,47 |
| TTTTTTTTGCTATTCGAGTAATTTTTTTTTT                    | 60,63 |
| AACAGTGACGTAGTTCAAGCCTGAATCTCAGC                   | 62,31 |
| GAGGTGGTTAGGTACGATGCTATTCAGAAT                     | 62,47 |
| TTTTTTTTTGACATCGACTCGCTATTTTTTTT                   | 62,63 |
| GAGGAGCGAATGGGTACCATATGACTAAGCCG                   | 64,31 |
| TACGAGCTTAATTCCTAAGCGCGCACCCGTT                    | 64,47 |
| TTTTTTTTTAGGGTGTACTTCGTCATTTTTTTT                  | 64,63 |
| TCCTCGGTGCTGCCATCCCTCCACATGAAAAC                   | 66,31 |
| AGCCGAACCCTGCGAACGTACGCATACGATTT                   | 66,47 |
| TTTTTTTTTCAAAAGGGCCGAATATTTTTTTT                   | 66,63 |
| ACCAGTTCCCGGTATGCTCTAAATAAGGAAT                    | 68,31 |
| CAGAGCGTGGTGATCTTCGTACAGTTGGACGG                   | 68,47 |
| TTTTTTTTGTTGGAATGCCATGATTTTTTTT                    | 68,63 |
| CTGGTTTGTCAACTTGCGGTAAACATCACATA                   | 70,31 |
| TGTTTTCCGATTGCGCCACGACGACGGGAATT                   | 70,47 |
| TTTTTTTTTATGCCCTGGAGTCATCTCGGCAT                   | 70,63 |
| TCTGATATACGGCCGGACTTAATATTCAGGCT                   | 72,31 |
| GATTGGGTCTGTGCTCACCGAAGCTGCTGGGT                   | 72,47 |
| TTTTTTTTGCTCGTATGGTAGAAGGAACTCTG                   | 72,63 |
| CAATTCCTCAATAACTTACCATTGTTATTGGCC                  | 74,31 |
| GATAATACCTTGACTTCACAGTGTGGTGAAT                    | 74,47 |
| TTTTTTTTTATTGACGCACCTATATAGCCATTT                  | 74,63 |
| ACCAATCATGGTGTGTCAGTGCGGAGTAAATG                   | 76,31 |
| TCTGATGGTACACTAAAATTCATATTGCCACC                   | 76,47 |
| TTTTTTTTTACGCTCCATACTGGAGCGCGGACA                  | 76,63 |
| ATTCGGATTGACGGAGCGTTACTGACCCCTAAC                  | 78,31 |
| CTCCACACGTACCTTACCCGAGAATCTATAC                    | 78,47 |
| TTTTTTTTTAATGATCGATGAACACATTTCTT                   | 78,63 |
| TGGCTCGTAAAAATCA                                   | 80,15 |
| CCTAGGCGCTAGGTGGACCTAATGATTTTATAGAACGATAACACTCAC   | 80,31 |
| GAAAACCTGGAGGTTAGTTCTGCTAGTACAAAT                  | 80,47 |
| AGTTAGATCCTCAAGCACTGAAAGATCGCAAGCTGTGCTATAATAG     | 80,63 |
| GTGCATCTCACAACCT                                   | 82,15 |
| CGGGTGTGAGAACCGATAACCTATTGTGCTTTTCGTATTAGGCTCCAA   | 82,31 |
| AATTAGAAACCCATCCCAACATTTATCTCTT                    | 82,47 |
| TTATCATGAAAAGTATTTCGGACGGAAAACTACAGCACTAAGTTACGAGT | 82,63 |
| GTGCGCTTGTGCAATT                                   | 84,15 |
| TACCGAGCCGGTTTACTTACGCCAGACAATGCTGTATGAATCTATGT    | 84,31 |
| GGGAGCTGACATGGTCCCGTAATCACGGTATT                   | 84,47 |
| CGCTGATCACTTACCTAACAGCAGGTTCGGCCCCACCTTATTTTTTGT   | 84,63 |
| ATCGCTCACATATTGT                                   | 86,15 |
| CCACAAAGGGTCATTGCTAGAGCTACTCGCCGAGTGTTTATGCTGGG    | 86,31 |
| GAATTATAATAGTGGAGCCAGTAGGCCGGGCT                   | 86,47 |
| CGACCATTACAGGATTGTACCATTATCAAAGATCATGAGGTTCCCT     | 86,63 |
| AATGTTCTTCAATTTT                                   | 88,15 |
| GCAGGGTGCGAACCCGTTCTGAATCGCGGGCTATAGAATGCTATTGAG   | 88,31 |
| GAGCTCACCCGTCGATCCGAGATTTTCGTTA                    | 88,47 |
| GCCGATGGCCACGTAAGCGTAGGAGTTGACCTATCCTGTCCGGTCTCGA  | 88,63 |
| CTAGTAACCGTAGTGGCGTCCCATTAAAGTATTAACACTTTAATTATA   | 90,31 |
| CGTTTATTAGGCTGCGAGGTTCATCCAAGGCGGACCACTCCTCTCCT    | 90,63 |
| CCTAGAACAGACGTCCAAGAGCAATATCCATTCTTCCATGCGGCGAAA   | 92,31 |
| TGGGAGAACGATAGTAAGGGTTCACCCGCTCATTACTGGCATTAAAGA   | 92,63 |
| TAGGTGGTTTATGTGAAGTCTACGTAGCGCTCTCTCCGCAAAAAGAT    | 94,31 |

|                                                  |       |
|--------------------------------------------------|-------|
| TGGTCGGTTAGGCGGACTGAAGGATAAGAACACAGGCAAGGGTGTGAG | 94,63 |
| GGTATTTTGGGCACGATAGGCAAGCGCCTCCGTTATATTATCAGATTC | 96,31 |
| GTAATGGTCGAAGGTCGCCCACGCCGGCGAAAGTGTCTCAATGGCAA  | 96,63 |
| ACAGTGCCCGCATTACAGATATCGCACATTGTAGGACTATTTGCTTTT | 98,31 |
| GATGATATGATGCGTTGGTTCGTGGCGCCGTGAGGAGGTGGGGTGACC | 98,63 |



### S3.9 ZX-4H×6H×96B-channel crystal sequences

|                                   |         |
|-----------------------------------|---------|
| CCAGGTIATTTTTTTTTTTTTTTAGTGGCTC   | 1, 23   |
| AATCATACTCACGGTAACTGTTGTGTCCTAT   | 1, 39   |
| GTTTACTTAGGGATGGTACGAACTCAACGCAC  | 1, 55   |
| GCTCGGGTAGTCTCAAGAAGATAGAGAGCATA  | 1, 71   |
| TTTTTTTAAATTCGCTAAACCGGATTTTTTTT  | 1, 87   |
| AAAGTATCTTTTTTTTTTTTTTTCGCATCTC   | 3, 23   |
| ACTCAGTGATCGAGTATTCATGTCGCCTTTTC  | 3, 39   |
| GAACGGTGACACACTTGTGTTTCATTCAGAGTA | 3, 55   |
| GCGGAAATATGGCCGCTTCGGTGCAGCGGG    | 3, 71   |
| TTTTTTTCCGCCTGTAAACGCTTATTTTTTTT  | 3, 87   |
| ATCAGCCCTTTTTTTTTTTTTTTGGGCTTTT   | 5, 23   |
| GCTAATACGCTGAGCGATGCTGTTGTTGCGGG  | 5, 39   |
| GTTTCTGAACCGGAACCGGGCTAATGAAGCC   | 5, 55   |
| GTGACCCAGAGACTGTCTGATGCACCGGGAG   | 5, 71   |
| TTTTTTTCCAGCCACTAGCTGTTTTTTTTT    | 5, 87   |
| GTCAGTGTTTTTTTTTTTTTTTGATCGCGA    | 7, 23   |
| GTTCCCTCTAGCTAGGGTGATGCCAAAAGGGT  | 7, 39   |
| GGATATGGAGCTGGAACGGCTCTGATTTCTAG  | 7, 55   |
| TGACCTGGTATAATGGCGGAGCTACCTGACCT  | 7, 71   |
| TTTTTTTCAATCATACGTCCCACTTTTTTTT   | 7, 87   |
| GGAAGGATTCATCCCTTTAAGAATGATCGCA   | 9, 23   |
| CAGTCTTTGAGATGTTGAACATCTTTTGGTTG  | 9, 39   |
| GCGTAAAGATCTCGCATTCTGGTGCCAAAAC   | 9, 55   |
| GCCGACTCGTTCAAGCACTATATCTGGCTAT   | 9, 71   |
| AAAAGATGTCTGTCAGCCAAAGCTTAGCATAA  | 9, 87   |
| GCGGCTGGACGACCCCGCGTGCGACGACTGA   | 9, 103  |
| CCGTCGAGCCCTGCGCGACAAAACGCATATCCT | 11, 23  |
| CGGCCCGCAAATTAATAGTCGATTACGCTTC   | 11, 39  |
| GCCTAAAGGTCCTCCACGGTAATCGGGGGTG   | 11, 55  |
| ACTCCGGCTCCTGGTATATTAGCTTACCCA    | 11, 71  |
| CTCGCGTGGCACGTCTACGACTCGTGAACGA   | 11, 87  |
| GGACTGTTCTACATAAGTACTTGGACGAGGTT  | 11, 103 |
| TCACTGGGCGCTATACAGGAACTCGAGGGGC   | 13, 23  |
| TCCCTGTCTGTGAGCCAGCGACCACTTCTG    | 13, 39  |
| GAGAAAGATGCGGTGGCAGTAGTTGTGATTAG  | 13, 55  |
| CTTGGGGGTGATATACTCACTAAACTCCTTC   | 13, 71  |
| TAATGTGACTAAGCGTAACTCCAAAAGGAAAC  | 13, 87  |
| CAGCTATCCCATATTCGATGTAAGCGGACATC  | 13, 103 |
| TATGCGCCCGATATCCGTTCAAACCTAGGGGGC | 15, 23  |
| TTCTGACCAAAGCTCATGAGAATTGTAACAG   | 15, 39  |
| GAACAGCTTAGAGCAGTCAAGTTCCGATACGC  | 15, 55  |
| TACCTATGGACGGGATATGCGACACCATGAT   | 15, 71  |
| CCGGATGAGTTATGAAGATCGTCATTGGGATA  | 15, 87  |
| TACAATCTCGAAGTAAAGCATAGCACCTGCG   | 15, 103 |
| AAGATAGGGTCACAGCAGTAATACCTCTACCT  | 17, 23  |
| TGTTGGACGTAAGCGTGAAATAACGACCAGAA  | 17, 39  |
| AGCACGAGGATTATACGTGTACCTCGAAATA   | 17, 55  |
| ATCGTTAGTTTCTCGACTGTTCCGAAACAGGC  | 17, 71  |
| AGCGGTAGCCTCCCACTTAACTATGCCTTGG   | 17, 87  |
| TAACTGATTTTCTCCTGGTCCGCTAGCTGAT   | 17, 103 |
| CTATGGTCCTTAATATAACCCTCGGAGGCAAG  | 19, 23  |
| GGGAGAGGGTGAAACAGGCCACCTGGCTCGGG  | 19, 39  |
| GAGTGCCCCCTCGGCAGCCGCTCGGTATAC    | 19, 55  |
| TCGTCAAGCCTGCTTCCATAGCTAACCCGAT   | 19, 71  |
| TGTGCAITCCACGTGAGTCTACTTAAAGCAA   | 19, 87  |
| ACGTGGGAGTGCCCGAGCGTCTGAGGTATGGT  | 19, 103 |
| TTACCCACTATGTTGTCTCAAGTGCTAACAGT  | 21, 23  |
| ACTAATTATCCATAACTGTGCACGTCAGGGAT  | 21, 39  |
| TCTCACCGGTGGCCGTTGCTACATCAGTTTCT  | 21, 55  |
| TTGCACTCCTGGGAAACTATACTTACGCACT   | 21, 71  |
| GGTTTGGAGGGATTAGGCAATTGCTAGGTTGC  | 21, 87  |
| ATTGTAGGCACAATTTTTGATTTCGATCACATA | 21, 103 |
| CATGGGCAATAAAGCTGTAGCCTGAGGCGCGC  | 23, 23  |
| AGCTGCACCGGTGCACCTTGATATTGAGGGAC  | 23, 39  |
| ACCTCGTCATTCGGATAAACCATACTGAGGGC  | 23, 55  |
| AGTGGGCGAGATCGGCTAATCATTAGTGCTCC  | 23, 71  |

|                                                   |         |
|---------------------------------------------------|---------|
| CTTAGTTAGTTCATAGTTCATTAGGGGCGGAA                  | 23, 87  |
| ATGGGCTGGTGCCCCACGTACAGTAAACCAACC                 | 23, 103 |
| AGTTCGTAGAAAAGCCGACATGAAGAGCCACTACACTGACCCTAGCTA  | 0, 47   |
| TCCGGTTTCCCGCTGCGCACCGAAGTGCGTTGCCATATCCCCATTATA  | 0, 79   |
| TAACCTGGAACCGTGA                                  | 1, 16   |
| ATGAACACATAGGACACAACAGTTGAGATGCGGGGCTGATCGCTCAGC  | 2, 47   |
| TAAGCGTTTATGCTCTCTATCTTCTACTCTGATCAGAAACCAGTCTCT  | 2, 79   |
| GATACTTTTACTCGAT                                  | 3, 16   |
| AACAGCATTTCGCGATCCTCGACGGTTAATTG                  | 4, 31   |
| CAGAGCCGCCGCAACCCTGAGTAAGTGTGTCACCGTTCGCGGCCAT    | 4, 47   |
| GCATCAGACTAGAAATCTTTAGGCCCAAGGAG                  | 4, 63   |
| GTGGGACGCTCCCGGTATTTCCGCACAGGCGG                  | 4, 79   |
| GGCATCACAAAAGCCCATCCTTCCAACATCTC                  | 6, 31   |
| TAGCCCGGACCCTTTGTATGATTCCATCCCTAAGTAAACTTGAGACT   | 6, 47   |
| TAGTCCGGGCTTCATCTTTACGCGCTTGAAC                   | 6, 63   |
| ACAGCTAAAAGGTCAGGACCCGAGCAGCGAATT                 | 6, 79   |
| TTCTTAAAAACCTCGTCCAAGTCATTATGCTATCATCCGGTACTTCCG  | 8, 15   |
| ATCGACTATGCGATCAGGCGCATATGAGCTTT                  | 8, 31   |
| CACCAGAAGAAGCGTAGAGGGAACCTCCAGCT                  | 8, 47   |
| CTAATATAAGTTTGGAGCTGTTCTCCCCGTC                   | 8, 63   |
| AGCTTGGGTGGGTAAGCCAGGTCATATGATTG                  | 8, 79   |
| CGTTTGTCTCAGTCGTCGCACGGCTCGTTTCGATCACATTAGAATATGG | 10, 15  |
| AGATGTTTCAGGATATGCCAGTGAGCTCGACA                  | 10, 31  |
| ATTACCGTCAACCAAAGTATTAGCGTTCGGT                   | 10, 47  |
| ATAATAGTACCCCCGCTTTCTCGTATATCA                    | 10, 63  |
| CGAGTCGTATAGCCAGGGGTCACGTGGCTGG                   | 10, 79  |
| GTTTGAACGATGTCCGAACAGTCCGCGCAGGG                  | 12, 15  |
| GTCGCTGGGCCCCCTAGACCATAGTGTTCAC                   | 12, 31  |
| GAACCTGACAGAAGTGGCGGGCCGGGAAGGAC                  | 12, 47  |
| TTAGTGAGGCGTATCCGGGCACTCAAAGCAGG                  | 12, 63  |
| TGACGATCGAAGGAGTCCGGAGTAGACGTGCCACGCGAGCTATGTAG   | 12, 79  |
| CTTACATCTATCCCCAAAATGCACATCGGGCAC                 | 12, 95  |
| AGTTTCTCGCAGGGTCCAGCCGCGGGGATGA                   | 14, 15  |
| AATTCTCAGCCCCTCGCTATCTTACGCTTAC                   | 14, 31  |
| AACTACTGCTGTTTACAAAGACTGTGCGAGAT                  | 14, 47  |
| GTCGCATACTAATCACCTCGTGTTCGAGAAA                   | 14, 63  |
| TGGAGTTAATCATGGTGAGTCGGCCTGACAGACATCTTTTGGGGTCGT  | 14, 79  |
| GCTATGCTGTTTCTTCTACCGCTAGGAGAAA                   | 14, 95  |
| GTATTACTACCATAACAGATTGTAGGATATCG                  | 16, 15  |
| AGGTGGCCAGGTAGAGTGCCCATGGTGACACGGTGCAGCTATCCGAAT  | 16, 31  |
| GGTACACGCCCCGAGCCGGTCAGAAGTCTCTA                  | 16, 47  |
| AGCTATGGTATTTTCGAGACGAGGTGCCGATCTCGCCACTCTATGAAC  | 16, 63  |
| TAGGTAAATCGGGTTCATAGGTATTCATAAC                   | 16, 79  |
| TCAGACGCCCAAGGCATAACTAAGTGGGGCACCAGCCCATAGCTTTAT  | 16, 95  |
| CGAGGGTATCAGCTAGATAGCTGGTATAGCG                   | 18, 15  |
| GTTATTTCTTGCCTCGTGGGTAAGTTATGGATAATTAGTACGGCCAC   | 18, 31  |
| GAGGCGGCTTCTGGTCGACAGGGACCACCGCA                  | 18, 47  |
| CGGAACAGGTATAACCCGGTGAGATTCCCCAGGAGTGCAACTAATCCC  | 18, 63  |
| AGTACGACGCTGTTTCCCCAAGACGCTTAG                    | 18, 79  |
| GCGGAACCTTGCTTTATCCAAACCAAAATTGTGCCTACAATACAACATA | 18, 95  |
| CGTGACAGCGCGCCTCAGGCTACTATGTGATTCCCACGTATATTAAG   | 20, 31  |
| AGTATAGTGCCCTCAGTATGGTTTATCCCTGACCTCTCCCTGCCGAGG  | 20, 63  |
| CGAATCAATTCCGCCCTAATGAAAAGTGCCTACTTGACGATCACGTGG  | 20, 95  |
| ATATCAAGACTGTTAGCACTTGAGGGTTGGTTATCAGTTAGCTGTGAC  | 22, 31  |
| AATGATTAAGAACTGATGTAGCAGTCCCTCAGTCCAACATGATAATC   | 22, 63  |
| ACTGTACGGCAACCTAGCAATTGCGGAGCACTCTAACGATGTGGGAGG  | 22, 95  |

## S4.1 XY-48H×64B-pore crystal sequences

|                                                   |       |
|---------------------------------------------------|-------|
| CCAGGTTAAGTGGCTCAATCATACTCACGGTT                  | 1,23  |
| AACTGTTGTGTCCATGTTTACTTAGGGATGG                   | 1,39  |
| TACGAACTCAACGCACGCTCGGGTAGTCTCAA                  | 1,55  |
| GAAGATAGAGAGCATAAATTCGCTAAAACCGGA                 | 1,71  |
| AAAGTATCCGCATCTCACTCAGTGATCGAGTA                  | 3,23  |
| TTCATGTCGCCTTTTCGAACGGTGACACACTT                  | 3,39  |
| GTGTTCAATCAGAGTAGCGGAAATATGGCCGC                  | 3,55  |
| TTCGGTGCAGCAGCGGGCCGCTGTAACGCTTA                  | 3,71  |
| ATCAGCCCGGGCTTTTGCTAATACGCTGAGCG                  | 5,23  |
| ATGCTGTTGTTGCGGGGTTTCTGAACCGGAAC                  | 5,39  |
| CCGGGCTAATGAAGCCGTGACCCAGAGACTG                   | 5,55  |
| TCTGATGCACCGGGAGCCAGCCACTTAGCTGT                  | 5,71  |
| GTCAGTGTGATCGCGAGTTCCCTTAGCTAGG                   | 7,23  |
| GTGATGCCAAAAGGGTGGATATGGAGCTGGAA                  | 7,39  |
| CGGCTCTGATTCTAGTGACCTGGTATAATGG                   | 7,55  |
| CGGAGCTACCTGACCTCAATCATACTGCCAC                   | 7,71  |
| GGAAGGATTCATCCCTTAAAGATGATCGCA                    | 9,23  |
| CAGTCTTTGAGATGTTGAACATCTTTTGGTTG                  | 9,39  |
| GCGTAAAGATCTCGCATTCTGGTGCCAAAAC                   | 9,55  |
| GCCGACTCGTTCAAGCACTATATCTGGCTAT                   | 9,71  |
| AAAAGATGTCTGTCAGCCAAAGCTTAGCATAA                  | 11,23 |
| GCGGCTGGACGACCCCGCGTGCAGCAGCTGA                   | 11,39 |
| CCGTCGAGCCCTGCGCGACAAAACGCATATCCT                 | 11,55 |
| CGGCCCGCCAAATTAATAGTCGATTACGCTTC                  | 11,71 |
| GCCTAAAAGTCTTCCACGGTAATCGGGGGTG                   | 13,23 |
| ACTCCGGCCTCCTTGGTATATTAGCTTACCCA                  | 13,39 |
| CTCGCGTGGCACGCTACGACTCGTCGAACGA                   | 13,55 |
| GGACTGTTCTACATAGTGACTTGGACGAGGTT                  | 13,71 |
| TCACTGGGCGCTATACAGGAAACTCGAGGGGC                  | 15,23 |
| TCCCTGTCTGTCGAGCCAGCGACCACTTCTG                   | 15,39 |
| GAGAAAGATGCGGTGGCAGTAGTTGTGATTAG                  | 15,55 |
| CTTGGGGGTGATATACCTCACTAAACTCCTTC                  | 15,71 |
| TAATGTGACTAAGCGTTAACTCCAAAGGAAAC                  | 17,23 |
| CAGCTATCCCATATTTCGATGTAAGCGGACATC                 | 17,39 |
| TATGCGCCCGATATCCGTTCAAACCTAGGGGGC                 | 17,55 |
| TTCTGACCAAAGCTCATGAGAATTGTAAACAG                  | 17,71 |
| GAACAGCTTAGAGCAGTCAAGTTCGGATACGC                  | 19,23 |
| TACCTATGGACGGGATATGCGACACCATGAT                   | 19,39 |
| CCGGATGAGTTATGAAGATCGTCATTGGGATA                  | 19,55 |
| TACAATCTCGAAGTAAAGCATAGCACCTGCG                   | 19,71 |
| AAGATAGGGTACAGCAGTAATACCTCTACCT                   | 21,23 |
| TGTTGGACGTAAGCGTGAAATAACGACCAGAA                  | 21,39 |
| AGCACGAGGATTATCACGTGTACCTCGAAATA                  | 21,55 |
| ATCGTTAGTTTCTCGACTGTTCCGAAACAGGC                  | 21,71 |
| AGCGGTAGCCTCCCACTTAACCTATGCCTTGG                  | 23,23 |
| TAACTGATTTTCTCCTGGTTCCGCTAGCTGAT                  | 23,39 |
| CTATGGTCCCTAATATAACCCTCGGAGGCAAG                  | 23,55 |
| GGGAGAGGGTGAAACAGGCCACCTGGCTCGGG                  | 23,71 |
| GAGTGCCCCCTCGGCAGCCGCTCGGTTATAC                   | 25,23 |
| TCGTCAAGCCTGCTTCCATAGCTAACCCGAT                   | 25,39 |
| TGTGCATTCCACGTGAGTCGTACTTAAAGCAA                  | 25,55 |
| ACGTGGGAGTGCCCGAGCGTCTGAGGTATGGT                  | 25,71 |
| TTACCCACTATGTTGTCTCAAAGTGCTAACAGT                 | 27,23 |
| ACTAATTATCCATAACTGTGCACGTCAGGGAT                  | 27,39 |
| TCTCACCGGTGGCCGTTGCTACATCAGTTTCT                  | 27,55 |
| TTGCACTCCTGGGGAAACTATACTTACGCACT                  | 27,71 |
| GGTTTGGAGGGATTAGGCAATTGCTAGGTTGC                  | 29,23 |
| ATTGTAGGCACAATTTTGTGATTCGATCACATA                 | 29,39 |
| CATGGGCAATAAAGCTGTAGCCTGAGGCGCGC                  | 29,55 |
| AGCTGCACCGTGTACACCTTGATATTGAGGGAC                 | 29,71 |
| ACCTCGTCATTCCGATAAACCATACTGAGGGC                  | 31,23 |
| AGTGGGCGAGATCGGCTAATCATTAGTGCTCC                  | 31,39 |
| CTTAGTTAGTTCATAGTTCATTAGGGGCGGAA                  | 31,55 |
| ATGGGCTGGTGCCCAACGTACAGTAACCAACC                  | 31,71 |
| GGTGTAACCTGTGGGTAGGGCCGAGCGCTGGGCTTACATGTGCAAGTGA | 33,23 |
| AATATATGACTTGGTGCACCATGCTGCTAGA                   | 33,39 |

|                                                   |       |
|---------------------------------------------------|-------|
| AACCACCAACATCCTCCTTGACACCTTTCAATTTTTAGTAAACACCCA  | 33,55 |
| ACAGAGCTGAACTTCCCATGGTCGTCTACTG                   | 33,71 |
| TCGTATGATCATAGGATCAAATAAATACAGCGTACCGCCAGTTCTTG   | 35,39 |
| TCCTTATTGGCGATCGTGCATTCCAATGTTTGATGGCCGCGTGGCTTA  | 35,71 |
| TTAAGACGGCCGGTGT                                  | 44,8  |
| AACCACATAAAGTCGTCCGCCTCCGGTAGTCA                  | 45,23 |
| ACGCGGAACGTAATGGCAGAAAAGTCTATACCCGACAAAAACAGATTTG | 45,39 |
| TACCGGGGTGAACAGCACGTGCGGCTTCTCCT                  | 45,55 |
| GTATCGCCTTGTGATTATACTCTTGCGGGGG                   | 45,71 |
| GGTCGAGCGCTCCACT                                  | 47,23 |
| GTAGTGGCCGGCCATCGTGGACTAGAAAAGCGCCGGCAATCTGAATATC | 47,55 |
| GCTACCTCCGATACGCGAACCAGAACCATTTA                  | 47,71 |
| AGAGTAGGGGCAGTGTCTCAGCCAAACAGTGGGACATCTCGGAAAGGTG | 49,23 |
| TCCCAAGTGCAAGTAAAAAAGGAATTATGAGA                  | 49,39 |
| TCATGTGGGATCCTAAAGTTTCTGGTAGACCTCGTAGGCTAGAGCGGT  | 49,55 |
| GATATCCACGGTACATTCGTTACTGCACGGA                   | 49,71 |
| ACGAGAGTGCTGGCATAAGCAAGAGAAAACCTAACTGGGGACTAAGAT  | 51,39 |
| CGTTGCGAATTTTCGCGCATTCGCATGTAGCCGAACGAGATCGTCT    | 51,71 |
| AGACGACGGATCTCCT                                  | 60,8  |
| GCATGCCGGTAGCACCGTCAAATATGCGTGCT                  | 61,23 |
| TTTAAACGCTTGTAGCCAGCTTGACGCAAGACGCTAATCACTGGGCAG  | 61,39 |
| GGTCTAGGTTGCAGAAACCTACCCCTAAGC                    | 61,55 |
| AGCGTAGTAAGGGTTACAAGTTCCTGCGGCGG                  | 61,71 |
| CTGTACGAATGAGTCC                                  | 63,23 |
| GGCCTTGACATGACATTCTCCACCCGTCCAACACCAGCAGGATGTCG   | 63,55 |
| AGCCACAACCTTGACAGTAGTACAGTATCTTT                  | 63,71 |
| GTATGATTTTTTTTTTTTTTTTTTTTGGACTCAT                | 0,15  |
| CCATATCCAACCGTGACCCAGTGAGCTCGACA                  | 0,31  |
| ACCCGAGCTTCCAGCTGTGGGAGAATGTCATG                  | 0,47  |
| TATGATTGTTGAGACTTCTTCTCGTATATCA                   | 0,63  |
| TTTTTTTTGTGGGACGTGTGGGCTTTTTTTTT                  | 0,79  |
| CACTGAGTTTTTTTTTTTTTTTTTTGGTGCTAC                 | 2,15  |
| AAGTAACTACTCGATCTTTAGGCCAAGGAG                    | 2,31  |
| ATTCCGCCATCCCTGCGTAAATCTGCAAC                     | 2,47  |
| AGCGAATTGCGGCCATCACGCGAGCTATGTAG                  | 2,63  |
| TTTTTTTTCCGGTTACTACGCTTTTTTTTT                    | 2,79  |
| GTATTAGCTTTTTTTT                                  | 4,15  |
| GGGGTCAACAAGTGTGTCACCGTTCCGCTCAGCCATCTTTTGGGGTCTG | 4,47  |
| TTTTTTTTAAGCGTTACAGGCGGCAGTCTCTCTCGACGGTTAATTG    | 4,79  |
| GAGGGAACTTTTTTTT                                  | 6,15  |
| CCAGTCAAGTCCGGTTCAGAAACCCTAGCTAATCCTTCCAACATCTC   | 6,47  |
| TTTTTTTTACAGCTAAGTGCTGGCCATTATACTTTACGCGCTTGAAC   | 6,79  |
| AGTTTCTTTTTTTTTTTTTTTTTTTTCGCGATCACACTGACACCCTTT  | 8,15  |
| AGATGTTCCGCCCTCGCTACCGCTAGGAGAAA                  | 8,31  |
| AACTACTGCAACCAAAGGCATCACCTAGAAATCAGAGCCGAGGTCAGG  | 8,47  |
| ATAATAGTCTAATCACGACCATAGTGTTCAC                   | 8,63  |
| TTTTTTTTATAGCCAGTAGCTCCGTTTTTTTT                  | 8,79  |
| TTCTTAAATTTTTTTTTTTTTTTTAAAAGCCCGGGCTGATCCCGCAAC  | 10,15 |
| CGCACGGCTGCGATCACCTATCTTACGCTTAC                  | 10,31 |
| CACCAGAATCAGTCGTAACAGCATGGCTTCATTAGCCCGGCTCCCGGT  | 10,47 |
| ATCGACTAAGTTTTGGCTCGTGCTTCGAGAAA                  | 10,63 |
| TTTTTTTTGAAGCGTAGCATCAGATTTTTTTTT                 | 10,79 |
| AGCTTGGGTTTTTTTTTTTTTTTTTTGAGATGCG                | 12,15 |
| CTAATATATTATGCTAAGCTGTCTCCCCGTC                   | 12,31 |
| CGTTTGCTGGGTAAGGACATGAATACTCTGA                   | 12,47 |
| CCAAGTCAAGGATATGTCATCCGGTTACTTCG                  | 12,63 |
| TTTTTTTTAACCTCGTGCACCGAATTTTTTTTT                 | 12,79 |
| ATTACCGTTTTTTTTTTTTTTTTTTGAGCCACT                 | 14,15 |
| GTCGCTGGCACCCCGTCACATTAGAATATGG                   | 14,31 |
| CGAGTCGTCAGAAGTGCAACAGTTGTGCGTTG                  | 14,47 |
| TTAGTGAGTCGTTCCGAGGCGCATATGAGCTTT                 | 14,63 |
| TTTTTTTTGAAGGAGTCTATCTTTTTTTTT                    | 14,79 |
| TGGAGTATTTTTTTTTTTTTTTTGTATAGCG                   | 16,15 |
| GCGGAACCGTTTCCCTGACGAGGTGCCGATCT                  | 16,31 |
| GTTTGAACATCAGCTAGACAGGGACCAACGCA                  | 16,47 |
| AGGTGGCCGCCCTATAACTAAGTGGGGCAC                    | 16,63 |
| TTTTTTTTCCCGAGCCCCCAAGTTTTTTTT                    | 16,79 |
| GAACTTGATTTTTTTTTTTTTTTTTTTGGAAGGAC               | 18,15 |

|                                                   |       |
|---------------------------------------------------|-------|
| CTTACATCGCGTATCCTCCAAACCAAATGTG                   | 18,31 |
| TGACGATCGATGTCGCGCCGGAGTAGACGTGC                  | 18,47 |
| AATTCTCATATCCCAATGCCCATGGTGACACG                  | 18,63 |
| TTTTTTTTCTGTTTACAACAGTCCTTTTTTTT                  | 18,79 |
| GTATTACTTTTTTTTTTTTTTTTCTGACAGA                   | 20,15 |
| GTCGCATAAGGTAGAGGTGGGTAAGTTATGGATAATTAGTACGGCCAC  | 20,31 |
| GGTACACGATCATGGTCCAGCCGCGCGCAGGG                  | 20,47 |
| GCTATGCTTATTTCGACGGTGAGATTCCCAGGAGTGCAATTTTTTTT   | 20,63 |
| TTTTTTTTCGCAGGGTGC GGCCGTTTTTTTTT                 | 20,79 |
| TAGGTTAATTTTTTTTTTTTTTTGGGGATGA                   | 22,15 |
| GTTATTTCCCAAGGCAGGGCACTCAAAGCAGGCTTGACGATCACGTGG  | 22,31 |
| CGAGGGTTTTCTGGTCAAAGACTGTGCGAGAT                  | 22,47 |
| CGGAACAGCTTGCCCTCAATGCACATCGGGCACTCCACGTTTTTTTTT  | 22,63 |
| TTTTTTTTGCCTGTTGAGTCGGCTTTTTTTTTT                 | 22,79 |
| AGCTATGGGCCCTCAGTATGGTTTTTTTTTTTTTTTTTTGTGGGAGG   | 24,31 |
| TCAGACGCTTCCGCCCTAATGAAATCGGGTTATCAGTTAATATTAAG   | 24,63 |
| TTTTTTTTACCATAACCCCTCTCCCTTTTTTTTTT               | 24,79 |
| TTTTTTTTTGCCGAGG                                  | 25,0  |
| CGTGCACAGTATAACCGAGGGCGGCTTTTTTTTTTTTTTTTGCTGTGAC | 26,31 |
| AGTATAGTTTGCCTTAAAGTACGACATCCCTGAGTCCAACATGATAAC  | 26,63 |
| TTTTTTTTAGTGCCTACTAACGATTTTTTTTTT                 | 26,79 |
| TTTTTTTTACAACATA                                  | 27,0  |
| CACTTGAGTTTTTTTTTTTTTTTCTGCTCTA                   | 28,15 |
| CGAATCAAACCTGTTAGTAGTTTGATCCTATGA                 | 28,31 |
| ATGTAGCATATGTGATCATAGGTATTCATAAC                  | 28,47 |
| ATATCAAGAGAAACTGGGAATGCACGATCGCC                  | 28,63 |
| TTTTTTTTGTCCCTCAAGATTGTATTTTTTTTTT                | 28,79 |
| GCAATTGCTTTTTTTTTTTTTTTTACGCTTAG                  | 30,15 |
| AATGATTAGCAACCTAGGTACACCGACCAAGT                  | 30,31 |
| CAGGCTACGGAGCACTGATAGCTGGGATATCG                  | 30,47 |
| ACTGTACGGCGCGCCTTGGTGGTTGGAAGTTC                  | 30,63 |
| TTTTTTTTGGTTGGTTGGTCAAGAATTTTTTTTTT               | 30,79 |
| CTCGGCCCTTTTTTTTTTTTTTTTATCCGAAT                  | 32,15 |
| ACATGTAAGCCCAGCGCTCGACCCGCGCTTTC                  | 32,31 |
| GTGTCAAAGTCACTTGCCGCCCACTCTATGAAC                 | 32,47 |
| TACTAAAAAATTGAAAGGCCACTACGCGTATCG                 | 32,63 |
| TTTTTTTTTGGGTGTTCAAGCCATTTTTTTTTT                 | 32,79 |
| GGCGGTACTTTTTTTTTTTTTTTTCTAATCCC                  | 34,15 |
| ATCTGGTCCAAGAACTATGTGGTTCCATTACG                  | 34,31 |
| GCGGCCATTCTAGCAGCTACAATAGCTTTAT                   | 34,47 |
| CGACCATGTAAGCCACCCCGGTAATACACAA                   | 34,63 |
| TTTTTTTTCAGTAGAAGTGCAGCTTTTTTTTTT                 | 34,79 |
| CGTCTAATTTTTTTTTTTTTTTTGCTGTATT                   | 44,15 |
| ACTTCTGACACCGGCTCTTGCTTATGCCAGC                   | 44,31 |
| TTTTGTGCGGTATAGTCATACGACAAAACATT                  | 44,47 |
| AGAGTATACAAAATCTGCGAATCGCGCGAAAAT                 | 44,63 |
| TTTTTTTTCCCCCGCAAATAAGGATTTTTTTTTT                | 44,79 |
| GGAGGCGGTTTTTTTTTTTTTTTACCACA                     | 46,15 |
| GATTGCCGTGACTACCCCTACTCTTTACTTGC                  | 46,31 |
| CCGCACGTGATATCACATATATTGAGGATGT                   | 46,47 |
| TCTGGTTCAAGGAGAAGCCACATGAATGTACCG                 | 46,63 |
| TTTTTTTTAAATGGTAGCTCTGTTTTTTTTTT                  | 46,79 |
| TGGCTGATTTTTTTTTTTTTTTTATAGTGGAGC                 | 48,15 |
| CGAGATGTCCCACTGTTTCGTACAGTTGGACGG                 | 48,31 |
| CAGAAACTCACCTTCTAGTCCACGATGGCCG                   | 48,47 |
| AGCCTACGAGGTCTACTCAAGGCCTGTCAAGT                  | 48,63 |
| TTTTTTTTACCGCTCTGAGGTAGCTTTTTTTTTT                | 48,79 |
| CCCCAAGTTTTTTTTTTTTTTTACGACTTT                    | 50,15 |
| TTCCTTTTATCTTAGTCGGCATGCGGTCTAAA                  | 50,31 |
| CTCGTTCGTCTATAATCCCGCTGCTGTTC                     | 50,47 |
| GTA AACGAAGGACGATCTAGGACCTAACCCCTT                | 50,63 |
| TTTTTTTTCCGTGCAGGCGATACTTTTTTTTTT                 | 50,79 |
| CGTCGCTTTTTTTTTTTTTTTTATAGGTTTC                   | 60,15 |
| TCAAGCTGAGGAGATCGATACTTGTAAAAGGC                  | 60,31 |
| TGATTAGCGTCTTGCGACTCTCGTCTACATG                   | 60,47 |
| GGA ACTTGCTGCCAGATGAACACCCCGCTGC                  | 60,63 |
| TTTTTTTTCCGCCGATCGCAACGTTTTTTTTT                  | 60,79 |
| TATTTGACTTTTTTTTTTTTTTTTGC ACTGCC                 | 62,15 |

TGCTGGTGAGCACGCATAACCTGGATAGGACA  
GGTAGGTTCGACATCCACTTGGGATTAGGATC  
TGTACTACGCTTAGGGAGTTCGTATATGCTCT  
TTTTTTTAAAGATACTGGATATCTTTTTTT

62,31  
62,47  
62,63  
62,79

## S4.2 XY-64H×64B-pore crystal sequences

|                                   |       |
|-----------------------------------|-------|
| CCAGGTTAAGTGGCTCAATCATACTCACGGTT  | 1,23  |
| AACTGTTGTGTCCATGTTTACTTAGGGATGG   | 1,39  |
| TACGAACTCAACGCACGCTCGGGTAGTCTCAA  | 1,55  |
| GAAGATAGAGAGCATAAATTCGCTAAAACCGGA | 1,71  |
| AAAGTATCCGCATCTCACTCAGTGATCGAGTA  | 3,23  |
| TTCATGTCGCCTTTTCGAACGGTGACACACTT  | 3,39  |
| GTGTTCAATCAGAGTAGCGGAAATATGGCCGC  | 3,55  |
| TTCGGTGCAGCAGCGGGCCGCTGTAACGCTTA  | 3,71  |
| ATCAGCCCGGGCTTTTGCTAATACGCTGAGCG  | 5,23  |
| ATGCTGTTGTTGCGGGGTTTCTGAACCGGAAC  | 5,39  |
| CCGGGCTAATGAAGCCGTGACCCAGAGACTG   | 5,55  |
| TCTGATGCACCGGGAGCCAGCCACTTAGCTGT  | 5,71  |
| GTCAGTGTGATCGCGAGTTCCCTTAGCTAGG   | 7,23  |
| GTGATGCCAAAAGGGTGGATATGGAGCTGGAA  | 7,39  |
| CGGCTCTGATTCTAGTGACCTGGTATAATGG   | 7,55  |
| CGGAGCTACCTGACCTCAATCATACTGCCAC   | 7,71  |
| GGAAGGATTCATCCCTTTAAGAAATGATCGCA  | 9,23  |
| CAGTCTTTGAGATGTTGAACATCTTTTGGTTG  | 9,39  |
| GCGTAAAGATCTCGCATTCTGGTGCCAAAAC   | 9,55  |
| GCCGACTCGTTCAAGCACTATATCTGGCTAT   | 9,71  |
| AAAAGATGTCTGTCAGCCAAAGCTTAGCATAA  | 11,23 |
| GCGGCTGGACGACCCCGCGTGCAGCAGCTGA   | 11,39 |
| CCGTCGAGCCCTGCGCGACAAAACGCATATCCT | 11,55 |
| CGGCCCGCCAAATTAATAGTCGATTACGCTTC  | 11,71 |
| GCCTAAAAGTCTTCCACGGTAATCGGGGGTG   | 13,23 |
| ACTCCGGCCTCCTTGGTATATTAGCTTACCCA  | 13,39 |
| CTCGCGTGGCACGCTACGACTCGTCGAACGA   | 13,55 |
| GGACTGTTCTACATAGTACTTGGACGAGGTT   | 13,71 |
| TACTGGGGCGTATACAGGAAACTCGAGGGGC   | 15,23 |
| TCCCTGTCTGTCGAGCCAGCGACCACTTCTG   | 15,39 |
| GAGAAAGATGCGGTGGCAGTAGTTGTGATTAG  | 15,55 |
| CTTGGGGGTGATATACCTCACTAAACTCCTTC  | 15,71 |
| TAATGTGACTAAGCGTAACTCCAAAGGAAAC   | 17,23 |
| CAGCTATCCCATATTTCGATGTAAGCGGACATC | 17,39 |
| TATGCGCCCGATATCCGTTCAAACCTAGGGGGC | 17,55 |
| TTCTGACCAAAGCTCATGAGAATTGTAAACAG  | 17,71 |
| GAACAGCTTAGAGCAGTCAAGTTCGGATACGC  | 19,23 |
| TACCTATGGACGGGATATGCGACACCATGAT   | 19,39 |
| CCGGATGAGTTATGAAAGATCGTCATTGGGATA | 19,55 |
| TACAATCTCGAAGTAAAGCATAGCACCTGCG   | 19,71 |
| AAGATAGGGTACAGCAGTAATACCTCTACCT   | 21,23 |
| TGTTGGACGTAAGCGTGAATAACGACCAGAA   | 21,39 |
| AGCACGAGGATTATCACGTGTACCTCGAAATA  | 21,55 |
| ATCGTTAGTTTCTCGACTGTTCCGAAACAGGC  | 21,71 |
| AGCGGTAGCCTCCCACTTAACCTATGCCTTGG  | 23,23 |
| TAACTGATTTTCTCCTGGTTCCGCTAGCTGAT  | 23,39 |
| CTATGGTCTTAATATAACCCTCGGAGGCAAG   | 23,55 |
| GGGAGAGGGTGAAACAGGCCACCTGGCTCGGG  | 23,71 |
| GAGTGCCCCCTCGGCAGCCGCTCGGTTATAC   | 25,23 |
| TCGTCAAGCCTGCTTCCATAGCTAACCCGAT   | 25,39 |
| TGTGCATTCCACGTGAGTCGTACTTAAAGCAA  | 25,55 |
| ACGTGGGAGTGCCCGAGCGTCTGAGGTATGGT  | 25,71 |
| TTACCCACTATGTTGTCTCAAAGTGCTAACAGT | 27,23 |
| ACTAATTATCCATAACTGTGCACGTCAGGGAT  | 27,39 |
| TCTCACCGGTGGCCGTTGCTACATCAGTTTCT  | 27,55 |
| TTGCACTCCTGGGGAAACTATACTTACGCACT  | 27,71 |
| GGTTTGGAGGGATTAGGCAATTGCTAGGTTGC  | 29,23 |
| ATTGTAGGCACAATTTTGTGATTCGATCACATA | 29,39 |
| CATGGGCAATAAAGCTGTAGCCTGAGGCGCGC  | 29,55 |
| AGCTGCACCGTGTACCTTGATATTGAGGGAC   | 29,71 |
| ACCTCGTCATTCCGATAAACCATACTGAGGGC  | 31,23 |
| AGTGGGCGAGATCGGCTAATCATTAGTGCTCC  | 31,39 |
| CTTAGTTAGTTCATAGTTCATTAGGGGCGGAA  | 31,55 |
| ATGGGCTGGTGCCCCACGTACAGTAACCAACC  | 31,71 |
| GGTGTACCTGTGGGTAGGGCCGAGCGCTGGGC  | 33,23 |
| TTACATGTGCAAGTGAATATATGACTTGGTC   | 33,39 |

|                                                    |       |
|----------------------------------------------------|-------|
| GACCAGATCTGCTAGAAACCACCAACATCCTC                   | 33,55 |
| CTTGACACCTTTCAATTTTTAGTAAACACCCA                   | 33,71 |
| ACAGAGCTGAACTTCCCATGGTCGTCTACTG                    | 35,23 |
| TCGTATGATCATAGGATCAAACTAAATACAGC                   | 35,39 |
| GTACCGCCAGTTCTTGTCTTATTGGCGATCG                    | 35,55 |
| TGCATTCCAATGTTTGATGGCCGCGTGGCTTA                   | 35,71 |
| TTAAGACGGCCGGTGAACACATAAAAGTCGT                    | 37,23 |
| CCGCCTCCGGTAGTCAACGCGGAACGTAATGG                   | 37,39 |
| CAGAAAGTCTATACCCGACAAAAACAGATTTG                   | 37,55 |
| TACCGGGTGAACAGCACGTGCGGCTTCTCCT                    | 37,71 |
| GTATCGCCTTGTGTATTATACTTTGCGGGGG                    | 39,23 |
| GGTCGAGCGCTCCACTGTAGTGGCCGCCATC                    | 39,39 |
| GTGGACTAGAAAAGCGCCGCAATCTGAATATC                   | 39,55 |
| GCTACCTCCGATACGGAACCAGAACCATTTA                    | 39,71 |
| AGAGTAGGGCAGTGCTCAGCAAACAGTGGGACATCTCGGAAAGGTG     | 41,23 |
| TCCCAAGTGCAAGTAAAAAGGAATTATGAGA                    | 41,39 |
| TCATGTGGGATCCTAAAGTTTCTGGTAGACCTCGTAGGCTAGAGCGGT   | 41,55 |
| GATATCCACGGTACATTTCGTTTACTGCACGGA                  | 41,71 |
| ACGAGAGTGCTGGCATAAGCAAGAGAAACCTAACTTGGGGACTAAGAT   | 43,39 |
| CGTTGCGAATTTTCGCGCGATTTCGCATGTAGCCGAACGAGATCGTCTC  | 43,71 |
| AGACGACGGATCTCCT                                   | 56,8  |
| GCATGCCGGTAGCACCGTCAAATATGCGTGCT                   | 57,23 |
| TTTAACGCTTTAGACCCAGCTTGACGCAAGACGCTAATCACTGGGCAG   | 57,39 |
| GGTCTAGGTTGCAGAAACCTACCCCTAAGC                     | 57,55 |
| AGCGTAGTAAGGGTTACAAGTCTCTGCGGCGG                   | 57,71 |
| CTGTACGAATGAGTCC                                   | 59,23 |
| GGCCTTGACATGACATTCTCCACCCGTCCAACACCAGCAGGATGTGC    | 59,55 |
| AGCCCACAACCTTGACAGTAGTACAGTATCTTT                  | 59,71 |
| TTTCATGGCGGCGATGTGCGCGTTTGTCTGCGTGCCTACGGCTTTTAT   | 61,23 |
| ATAGCGTAGACCGGACAACCCCGTAAATCGTA                   | 61,39 |
| AGAGTCGTTATGCCCCCGGTTCTGCTAGAGTGGGACTGGATCAGATG    | 61,55 |
| TTCAAAGTATTTCGGTGACCTCCCCGCATTACAA                 | 61,71 |
| CGCGCTTACCAAGTAAACGTATGTACGACGCGATGCGAGTGAACGGGTG  | 63,39 |
| GATGAATTCGTTTCGGGGCCAGGCGATCTAAGTCTGGCGCGTGAGGAC   | 63,71 |
| ACGTAAGTTGAAGTAG                                   | 76,8  |
| GAAGCTTTTTCTAGCCATAGCATCGACACTAC                   | 77,23 |
| GACCTGCTTTTTCGACACGGAAGTGCATTCTGGACAGTAACTGCATTAAC | 77,39 |
| TACGTGCTCCCAACATAAGTGACGTCTCAGC                    | 77,55 |
| AGTTGAAAATTATCTCGATAAGCAGAAGGACC                   | 77,71 |
| TGTATAACTGGCAAGA                                   | 79,23 |
| GACAAGGCCGCTTCAGAAAGGATAGCCGGACCGTATTAATGCCGCGCC   | 79,55 |
| AACGGTTTCCCGGACCTAGTGTCTATCAAGTC                   | 79,71 |
| TATTCTATGAAACCATCTCGGGTCGAGCGGGTCACTGTTGTGACCTA    | 81,23 |
| CGAGAAGCGTATAGATGTTCCGCGCGAATAGC                   | 81,39 |
| TCACAGGCGAACTACGTATGAATTGGTTTAAACGCTCCTCGGGAATTA   | 81,55 |
| ATACGACAGGTGGCAAACACCTCCGATGTCA                    | 81,71 |
| GCGCCGCATACCCATCTACTGTGAATTTCCACACCGAGGATTTCGAGG   | 83,39 |
| TCCATGGGATTACCAAGCTCGTATACACCCTGATTCTCCATGGCAGC    | 83,71 |
| GCTTCGGTACAGGTCT                                   | 96,8  |
| GAAGTGGTAGATCACCATAGTGTACCCAGCA                    | 97,23 |
| GTTCCGGCTCCCTTGTGGACTCGGGATACCCGGTTCGTCGTGTAATGCTG | 97,39 |
| TTCCGGGGTAAATCAAGCTTTATAAATCCCG                    | 97,55 |
| ACGCTCTGTTCCAAACTTTAGAGCCCGGCCGT                   | 97,71 |
| AATCTCGGATTCCTTA                                   | 99,23 |
| AAAACCAGGCGCAATCTATGGCATAAACGAAACCAATCATACGAGC     | 99,55 |
| GTGGAGGGAAGTTATTCTACTGGCGTTTTTCAT                  | 99,71 |
| GTATGATTTTTTTTTTTTTTTTTTTTAAAGGAAT                 | 0,15  |
| AGATGTTCAACCGTGAAGCTGTTCTCCCCGTC                   | 0,31  |
| ACCCGAGCCAACCAATGCCATGAGATTGCGC                    | 0,47  |
| ATAATAGTTTGAGACTTCATCCGGTACTTCG                    | 0,63  |
| TTTTTTTTATAGCCAGCCCTCCACTTTTTTTTT                  | 0,79  |
| CACTGAGTTTTTTTTTTTTTTTTTTGGTGATCT                  | 2,15  |
| AAGTAACTACTCGATTACATTAGAATATGG                     | 2,31  |
| ATTTCCGCCATCCCTAGCCGAACCTTGATTTA                   | 2,47  |
| AGCGAATTGCGGCCATGGCGCATATGAGCTTT                   | 2,63  |
| TTTTTTTTTCCGGTTTCAGAGCGTTTTTTTTTT                  | 2,79  |
| GTATTAGCTTTTTTTT                                   | 4,15  |
| GGGGTCAAAAGTGTGTACCCGTTCCGCTCAGCCCCAGTGAGCTCGACA   | 4,47  |



|                                                      |       |
|------------------------------------------------------|-------|
| TTTTTTTTTAAGCGTTACAGGCGGCAGTCTCTTCTTCTCGTATATCA      | 4,79  |
| GAGGGAACTTTTTTTT                                     | 6,15  |
| CCAGGTCAGTTCGGGTTTCAGAAACCCTAGCTACTTTAGGCCCAAGGAG    | 6,47  |
| TTTTTTTTTACAGCTAAGTGCTGGCCATTATACACGCGAGCTATGTAG     | 6,79  |
| TTCTTAAATTTTTTTTT                                    | 8,15  |
| CACCAGAATTCAGCTCCATATCCTGCGATCACATCTTTGGGGTTCGT      | 8,47  |
| TTTTTTTTGTGGGACGTATGATTGAGTTTTGGCTCGACGGTTAATTTG     | 8,79  |
| GAAC TTGATTTTTTTTTTTTTTTTTTTGGGGATGAATCCTTCCAACATCTC | 10,15 |
| CGCACGGCGCGTATCCTCCAAACCAAATTGTG                     | 10,31 |
| TGACGATCTCAGTCGTAAGACTGTGCGAGATCTTACGCGCTTGAAC       | 10,47 |
| ATCGACTATATCCCAATGCCCATGGTGACACG                     | 10,63 |
| TTTTTTTTGAAGCGTAGAGTCGGCTTTTTTTTT                    | 10,79 |
| AGCTTGGGTTTTTTTTTTTTTTTTTTTCGCGATCACACTGACACCCTTTT   | 12,15 |
| CTAATATAATTATGCTAGTGGGTAAGTTATGGA                    | 12,31 |
| CGTTTGTCTGGGTAAGGGCATCACCTAGAAATCAGAGCCGAGGTCAGG     | 12,47 |
| CCAAGTCAAGGATATGCGGTGAGATTCCCCAG                     | 12,63 |
| TTTTTTTTAACCTCGTTAGCTCCGTTTTTTTT                     | 12,79 |
| ATTACCGTTTTTTTTTTTTTTTTTTTAAAAGCCCGGCTGATCCCGCAAC    | 14,15 |
| GTCGCTGGCACCCCGGGGCACTCAAAGCAGG                      | 14,31 |
| CGAGTCGTCAGAAGTGAACAGCATGGCTTCATTAGCCCGGCTCCCGGT     | 14,47 |
| TTAGTGAGTCGTTGAAATGCACATCGGGCAC                      | 14,63 |
| TTTTTTTTGAAGGAGTGCATCAGATTTTTTTTT                    | 14,79 |
| AGTTTCCTTTTTTTTTTTTTTTTTTTGAGATGCGGATACTTTGAAAAGGC   | 16,15 |
| CTTACATCGCCCTCGCTACCGCTAGGAGAAA                      | 16,31 |
| AACTACTGGATGTCGGGACATGAATACTCTGAATGAACACCCCGCTGC     | 16,47 |
| AATTCTACTAATCACGACCATAGTGTTCAC                       | 16,63 |
| TTTTTTTTCTGTTTACGCAACCGAATTTTTTTTT                   | 16,79 |
| TGGAGTTATTTTTTTTTTTTTTTTTTGAGCCACTTAACCTGGATAGGACA   | 18,15 |
| GTCGATAGTTTCTTCTATCTTACGCTTAC                        | 18,31 |
| GTTTGAACATCATGGTCAACAGTTGTGCGTTGAGTTCGTATATGCTCT     | 18,47 |
| GCTATGCTGCCCCCTACTCGTGCTTCGAGAAA                     | 18,63 |
| TTTTTTTTCGCAGGGTCTATCTTCTTTTTTTTT                    | 18,79 |
| GTATTACTTTTTTTTTTTTTTTTTTTCTGCTCTA                   | 20,15 |
| CGAATCAAAGGTAGAGGGCGATACAGTGGAGC                     | 20,31 |
| GGTACACGATGTGATCATAGGTATTCATAAC                      | 20,47 |
| ATATCAAGTATTTGATAGTCCACGCGTATCG                      | 20,63 |
| TTTTTTTTGTCCCTCAAGATTGATTTTTTTTT                     | 20,79 |
| TAGGTTAATTTTTTTTTTTTTTTTTTACGCTTAG                   | 22,15 |
| GTTAATTCCTCAAGGCACGCTTAATGACTACC                     | 22,31 |
| CGAGGGTTTTCTGGTGCATAGCTGGGATATCG                     | 22,47 |
| CGAACAGCTTGCCCTACTTCTGGCTGTTCA                       | 22,63 |
| TTTTTTTTGCCTGTTTGGTCAGAATTTTTTTTT                    | 22,79 |
| GAGGCGGCTTTTTTTTTTTTTTTTGTATAGCG                     | 24,15 |
| GCGGAACCGTATAACCAGCTCTGTTCTATGATCATAAGCAAGAACT       | 24,31 |
| AGTACGACATCAGCTAGACAGGGACCACCGCA                     | 24,47 |
| AGGTGGCCTTGGCTTAGGGGTACCAAACATTGGAATGCATTTTTTTTT     | 24,63 |
| TTTTTTTTCCCGAGCCCCCAAGTTTTTTTT                       | 24,79 |
| CAGTTGAGTTTTTTTTTTTTTTTTTTGGAAGGAC                   | 26,15 |
| AGCTATGGACTGTTAGGGTACACCTCACTGCACATGTAATCTAGCAG      | 26,31 |
| ATGTAGCAATCGGGTTGCCGGAGTAGACGTGC                     | 26,47 |
| TCAGACGCAGAAACTGATCTGGTCATTGAAAGGTGCAAGTTTTTTTT      | 26,63 |
| TTTTTTTTACCATAACCAACAGTCTTTTTTTTT                    | 26,79 |
| GCAATGCTTTTTTTTTTTTTTTTCTGACAGA                      | 28,15 |
| CGTGACAGCAACCTAGACGAGGTGCCGATCTCGCCCACTCTATGAAC      | 28,31 |
| CAGGCTACATCCCTGACCAGCCGCGCAGGG                       | 28,47 |
| AGTATAGTGCAGCCTTAACTAAGTGGGGCACCAGCCATTTTTTTTT       | 28,63 |
| TTTTTTTTAGTGCATAGCGGGCCGTTTTTTTT                     | 28,79 |
| AATGATTACCCCGCAAGAGTATATTTTTTTTTTTTTTTCTAATCCC       | 30,31 |
| ACTGTACGGATATTCAGATTGCCGGGAGCACTCTACAATAGCTTTAT      | 30,63 |
| TTTTTTTTGGTTGGTTGTCAGCTTTTTTTTT                      | 30,79 |
| TTTTTTTTATCCGAAT                                     | 31,0  |
| CATATATTGCCCTCAGTATGGTTTTTTTTTTTTTTTTTTTACAACATA     | 32,31 |
| TACTAAAATTCGCCCTAATGAAGACCAAGTTAATTAGTACGGCCAC       | 32,63 |
| TTTTTTTTGGGTGTTGAGTGCAATTTTTTTTT                     | 32,79 |
| TTTTTTTTTACCACA                                      | 33,0  |
| TAGTTTGGAGCCAGCGCTCGGCCCTTTTTTTTTTTTTTTTTTTGCCGAGG   | 34,31 |
| GCGGCCATGAGGATGTTGGTGGTTGCTGTATCTTGACGATCACGTGG      | 34,63 |
| TTTTTTTTTAAGCCACTCCACGTTTTTTTT                       | 34,79 |

|                                    |       |
|------------------------------------|-------|
| TTTTTTTTGGAAGTTC                   | 35,0  |
| CGACCATGTTTTTTTTTTTTTTTTGTGGGAGG   | 36,15 |
| TTCCGCGTCAGTAGAATCTTGCTTATGCCAGC   | 36,31 |
| AATAAGGACCATTACGATCAGTTAATATTAAG   | 36,47 |
| CCGCACGTGATCGCCGAATCGCGCGAAAAT     | 36,63 |
| TTTTTTTTAGGAGAAGCCTCTCCCTTTTTTTT   | 36,79 |
| ATGTGGTTTTTTTTTTTTTTTTTGTGTGAC     | 38,15 |
| GCCACTACACGACTTCTACTCTTACTTGC      | 38,31 |
| TTTTGTGATGGCCGGTCCAAACATGATAATC    | 38,47 |
| TCTGGTTCCAAATCTGCCACATGAATGTACCG   | 38,63 |
| TTTTTTTTTAAATGGTCTAACGATTTTTTTTT   | 38,79 |
| TTGGCTGATTTTTTTTTTTTTTATAACAA      | 40,15 |
| CGAGATGTCCCACTGTCTACAGTTGGACGG     | 40,31 |
| CAGAACTCACCTTTCGCTCGACCGCGCTTTC    | 40,47 |
| AGCCTACGAGGTCTACTCAAGGCCTGTCAAGT   | 40,63 |
| TTTTTTTTACCGCTCTGAGGTAGCTTTTTTTT   | 40,79 |
| CCCCAAGTTTTTTTTTTTTTTTACACCGGC     | 42,15 |
| TTCTTTTATCTTAGTCGGCATGCGGTCTAAA    | 42,31 |
| CTCGTTCGTCTCATAAGGAGGCGGGGTATAG    | 42,47 |
| GTAACGAAGGACGATCTAGGACCTAACCTT     | 42,63 |
| TTTTTTTTCCGTGCACCCCGGATTTTTTTTT    | 42,79 |
| CGTCGTCTTTTTTTTTTTTTTTTATAGTTTC    | 56,15 |
| TCAAGCTGAGGAGATCTACATACGTTACTGG    | 56,31 |
| TGATTAGCGTCTTGCCTCTCGTGTACATG      | 56,47 |
| GGAACCTGTGCCAGGCCTGGCCCCGAACGA     | 56,63 |
| TTTTTTTTCCGCCGATCGCAACGTTTTTTTTT   | 56,79 |
| TATTTGACTTTTTTTTTTTTTTTTGCCTGCC    | 58,15 |
| TGCTGGTGAGCACGCACCATGAAAGTCCGGTC   | 58,31 |
| GGTAGTTTCGACATCCACTTGGGATTAGGATC   | 58,47 |
| TGTACTACGCTTAGGGACGACTTTCACCGAA    | 58,63 |
| TTTTTTTTAAAGATACTGGATATCTTTTTTTT   | 58,79 |
| AACGGCGATTTTTTTTTTTTTTTTGGACTCAT   | 60,15 |
| CGTACGCACGCGAGCAGTTATACAGGTCCGGC   | 60,31 |
| AGAACCAGATAAAAGCGTGGGAGAATGTCATG   | 60,47 |
| CCAGTCCCACTTAGCGCCTTGTCCGGTCCGGG   | 60,63 |
| TTTTTTTTCATCTGATGTGGGCTTTTTTTTTT   | 60,79 |
| CACTCGCATTTTTTTTTTTTTTTTGGTGCTAC   | 62,15 |
| ACGGGGTTCACCCGTAAAGCTTCTGTGAAA     | 62,31 |
| GCGCCAGATACGATTTGCGTTAAATCTGCAAC   | 62,47 |
| CGGGGAGGGTCTCACAGCACGTAGAGATAAT    | 62,63 |
| TTTTTTTTTGTAATGACTACGCTTTTTTTTTT   | 62,79 |
| ACTTACGTTTTTTTTTTTTTTTTTTCGCGTTCG  | 76,15 |
| GCAGTCCGCTACTTATCACAGTGAATGGGTA    | 76,31 |
| AGTACTGTCCAGAATTAAGCGCGCTTAGATC    | 76,47 |
| TGCTTATCGTTAATGCTACGAGCTTGGTGAAT   | 76,63 |
| TTTTTTTTGGTCTTCAATTCATCTTTTTTTT    | 76,79 |
| GATGCTATTTTTTTTTTTTTTTTTCATCGCCG   | 78,15 |
| ATTAATACGTAGTGTATAGAATAATCTATAC    | 78,31 |
| CGTCACTTGGCGCGGTACGCTATGGGGCATA    | 78,47 |
| AGACACTAGCTGAGGAGCCTGTGATTGCCACC   | 78,63 |
| TTTTTTTTGACTTGATTAATGAAATTTTTTTT   | 78,79 |
| ACCCGAGATTTTTTTTTTTTTTTTCTTGCCA    | 80,15 |
| AACAGTGACCCGCTCGCCGAGATTTTCGTTTA   | 80,31 |
| AATTCATATAGGTCACTATCTTCTGAAGCG     | 80,47 |
| GAGGAGCGTTAAACCCTGGTTTTAATAACTT    | 80,63 |
| TTTTTTTTAATCCCAAACCGTTTTTTTTTTT    | 80,79 |
| TCCTCGTTTTTTTTTTTTTTTTTGGCTAGAA    | 82,15 |
| CGCGAAACCCTGCGAAACAGTTCACAAGGG     | 82,31 |
| GGAGAATCGCTATTCGAGCAGGTCATGTTGGG   | 82,47 |
| GAGGTGGTGTGCCATCCCCGGAAGTTGGAA     | 82,63 |
| TTTTTTTTGACATCGTTCAACTTTTTTTTTT    | 82,79 |
| CCCGAGTCAGACCTGTACCGAAGCTTTTTTTTTT | 96,31 |
| GCTCTAAACAGCATACACGACGACCGGGTATG   | 96,63 |
| TTTTTTTTACGGCCGGCCATGGATTTTTTTTTT  | 96,79 |
| GATTGGGTTGCTGGGTACACTAATTTTTTTTTT  | 98,31 |
| GCCAGTAGCGGGAATTTATAAAGCGCTCGTATG  | 98,63 |
| TTTTTTTTATGAAAACCTGTCGATTTTTTTTTT  | 98,79 |

### S4.3 XY-4H×4H×32B-tube crystal sequences

|                                   |       |
|-----------------------------------|-------|
| CCAGGTAAAGTGGCTCAATCATACTCACGGTT  | 1,23  |
| AACTGTTGTGTCCATGTTTACTTAGGGATGG   | 1,39  |
| TACGAACTCAACGCACGCTCGGGTAGTCTCAA  | 3,23  |
| GAAGATAGAGAGCATAAATTCGCTAAAACCGGA | 3,39  |
| AAAGTATCCGCATCTCACTCAGTGATCGAGTA  | 5,23  |
| TTCATGTCGCCTTTTCGAACGGTGACACACTT  | 5,39  |
| GTGTTCAATCAGAGTAGCGGAAATATGGCCGC  | 7,23  |
| TTCGGTGCAGCAGCGGGCCGCTGTAACGCTTA  | 7,39  |
| ATCAGCCCGGGCTTTTGCTAATACGCTGAGCG  | 9,23  |
| ATGCTGTTGTTGCGGGGTTTCTGAACCGGAAC  | 9,39  |
| CCGGGCTAATGAAGCCGTGACCCAGAGACTG   | 11,23 |
| TCTGATGCACCGGGAGCCAGCCACTTAGCTGT  | 11,39 |
| GTCAGTGTGATCGCGAGTTCCTCTAGCTAGG   | 13,23 |
| GTGATGCCAAAAGGGTGGATATGGAGCTGGAA  | 13,39 |
| CGGCTCTGATTTCTAGTGACCTGGTATAATGG  | 15,23 |
| CGGAGCTACCTGACCTCAATCATACTGCCAC   | 15,39 |
| GTATGATTTTTTTTTTTTTTTTTTTCTAGAAAT | 0,15  |
| AGCGAATTAACCGTGAATGAACACCCCGCTGC  | 0,31  |
| TTTTTTTTCCGGTTTTAGCTCCGTTTTTTTT   | 0,47  |
| ACCCGAGCTTTTTTTTTTTTTTTTCGCGATC   | 2,15  |
| AAGTAACTTGAGACTGATACTTTGAAAAGGC   | 2,31  |
| TTTTTTTTCCATCCCTGGCATACTTTTTTTTT  | 2,47  |
| ATTTCCGCTTTTTTTTTTTTTTTGTGCGTTG   | 4,15  |
| CACCGTTCGCGGCCATTAGCCCGCTCCCGGT   | 4,31  |
| TTTTTTTTAAGTGTGTCATCTCTTTTTTTTT   | 4,47  |
| CACTGAGTTTTTTTTTTTTTTTGAGCCACT    | 6,15  |
| ACAGGCGTACTCGATGGGCTGATCCCGCAAC   | 6,31  |
| TTTTTTTTAAGCGTTCAACAGTTTTTTTTTT   | 6,47  |
| GTATAGCTTTTTTTTTTTTTTTTACTCTGA    | 8,15  |
| GTGGCTGGCGCTCAGCCAGAGCCGAGGTCAGG  | 8,31  |
| TTTTTTTTACAGCTAAGCACCGAATTTTTTTTT | 8,47  |
| GGGGTCACTTTTTTTTTTTTTTTGAGATGCG   | 10,15 |
| TCAGAAACAGTCTCTACTGACACCCTTTT     | 10,31 |
| TTTTTTTTGTCCGGTGACATGAATTTTTTTTT  | 10,47 |
| CCAGGTCATTTTTTTTTTTTTTTGGCTTCAT   | 12,15 |
| CCATATCCCAATTATAAGTTCGTATATGCTCT  | 12,31 |
| TTTTTTTTTCCAGCTGCAFCAGATTTTTTTTT  | 12,47 |
| GAGGGAACTTTTTTTTTTTTTTAAAAGCCC    | 14,15 |
| TATGATTGCCTAGCTATAACCTGGATAGGACA  | 14,31 |
| TTTTTTTTGTGGGACGAACAGCATTTTTTTTT  | 14,47 |

#### S4.4 XY-4H×4H×32B-cuboid crystal using alternating DNA-bricks sequences

|                                    |       |
|------------------------------------|-------|
| CCAGGTAAAGTGGCTCAATCATACTCACGGTT   | 1,23  |
| AACTGTTGTGTCCTATGTTTACTTAGGGATGG   | 1,39  |
| TACGAACTCAACGCACGCTCGGGTAGTCTCAA   | 3,23  |
| GAAGATAGAGAGCATAAAATTCGCTAAAACCGGA | 3,39  |
| AAAGTATCCGCATCTCACTCAGTGATCGAGTA   | 4,8   |
| TTCATGTCGCCTTTTCGAACGGTGACACACTT   | 4,24  |
| GTGTTCATTACAGAGTAGCGGAAATATGGCCGC  | 6,8   |
| TTCGGTGCAGCAGCGGGCCGCTGTAACGCTTA   | 6,24  |
| ATCAGCCCGGGCTTTTGCTAATACGCTGAGCG   | 9,23  |
| ATGCTGTTGTTGCGGGGTTTCTGAACCGGAAC   | 9,39  |
| CCGGGCTAATGAAGCCGTGACCCAGAGACTG    | 11,23 |
| TCTGATGCACCGGGAGCCAGCCACTTAGCTGT   | 11,39 |
| GTCAGTGTGATCGGAGTTCCTCTAGCTAGG     | 12,8  |
| GTGATGCCAAAAGGGTGGATATGGAGCTGGAA   | 12,24 |
| CGGCTCTGATTCTAGTGACCTGGTATAATGG    | 14,8  |
| CGGAGCTACCTGACCTCAATCATACTGCCAC    | 14,24 |
| GTATGATTTTTTTTTTCCATTATA           | 0,15  |
| AGCGAATTAACCGTGAATTTCCGCAAGTGTGT   | 0,31  |
| TTTTTCCGGTTCCATATCCTTTT            | 0,43  |
| TTTTGAGCCACTCAGAGCCGTTTT           | 1,4   |
| TAACCTGGATAGGACAGCACCGAATACTCTGA   | 1,16  |
| CAACAGTTTTTTTTTTAGGTCAGG           | 1,32  |
| ACCCGAGCTTTTTTTTCTAGCTA            | 2,15  |
| AAGTAACTTGAGACTCACTGAGTTAAGCGTT    | 2,31  |
| TTTTCCATCCCTTATGATTGTTTT           | 2,43  |
| TTTTGTGCGTTGACACTGACTTTTT          | 3,4   |
| AGTTCGTATATGCTCTGACATGAAGAGATGCG   | 3,16  |
| CTATCTTCTTTTTTTTACCCTTTT           | 3,32  |
| GTATTAGCTTTTTTTTGCGGCCAT           | 8,15  |
| GTGGCTGGCGCTCAGCCCAGGTCATTCCAGCT   | 8,31  |
| TTTACAGCTAACACCGTTCTTTT            | 8,43  |
| TTTTAAAAGCCCATGAACACTTTT           | 9,4   |
| GGGCTGATCCCGCAACTAGCTCCGCTAGAAAT   | 9,16  |
| AACAGCATTTTTTTTTTCCCGCTGC          | 9,32  |
| GGGGTCACTTTTTTTTACTCGAT            | 10,15 |
| TCAGAAACCAGTCTCTGAGGGAACGTGGGACG   | 10,31 |
| TTTTGTTCCGGTACAGGCGGTTTT           | 10,43 |
| TTTTGGCTTCATGATACTTTTTTT           | 11,4  |
| TAGCCCGGCTCCCGGTGGCATCACTCGCGATC   | 11,16 |
| GCATCAGATTTTTTTTAAAAAGGC           | 11,32 |

#### S4.5 XY-4H×4H×64B-cuboid crystal sequences

|                                    |       |
|------------------------------------|-------|
| CCAGGTAAAGTGGCTCAATCATACTCACGGTT   | 1,23  |
| AACTGTTGTGTCCATGTTTACTTAGGGATGG    | 1,39  |
| TACGAACTCAACGCACGCTCGGGTAGTCTCAA   | 1,55  |
| GAAGATAGAGAGCATAAAATTCGCTAAAACCGGA | 1,71  |
| AAAGTATCCGCATCTCACTCAGTGATCGAGTA   | 3,23  |
| TTCATGTCGCCTTTTCGAACGGTGACACACTT   | 3,39  |
| GTGTTCAATCAGAGTAGCGGAAATATGGCCGC   | 3,55  |
| TTCGGTGCAGCAGCGGGCCGCTGTAACGCTTA   | 3,71  |
| ATCAGCCCGGGCTTTTGCTAATACGCTGAGCG   | 5,23  |
| ATGCTGTTGTTGCGGGGTTTCTGAACCGGAAC   | 5,39  |
| CCGGGCTAATGAAGCCGTGACCCAGAGACTG    | 5,55  |
| TCTGATGCACCGGGAGCCAGCCACTTAGCTGT   | 5,71  |
| GTCAGTGTGATCGGAGTTCCCTTAGCTAGG     | 7,23  |
| GTGATGCCAAAAGGGTGGATATGGAGCTGGAA   | 7,39  |
| CGGCTCTGATTTCTAGTGACCTGGTATAATGG   | 7,55  |
| CGGAGCTACCTGACCTCAATCATAACGTCCAC   | 7,71  |
| GGAAGGATTCATCCCTTTAAGAATGATCGCA    | 9,23  |
| CAGTCTTTGAGATGTTGAACATCTTTTGGTTG   | 9,39  |
| GCGTAAAGATCTCGCATTCTGGTGCCAAAAC    | 9,55  |
| GCCGACTCGTTCAAGCACTATATCTGGCTAT    | 9,71  |
| AAAAGATGTCTGTCAGCCCAAGCTTAGCATAA   | 11,23 |
| GCGGCTGGACGACCCCGCGTGCGACGACTGA    | 11,39 |
| CCGTCGAGCCCTGCGCGACAAAACGCATATCCT  | 11,55 |
| CGGCCCGCCAAATTAATAGTCGATTACGCTTC   | 11,71 |
| GCCTAAAAGTCTTCCACGGTAATCGGGGGTG    | 13,23 |
| ACTCCGGCCTCCTGGTATATTAGCTTACCCA    | 13,39 |
| CTCGCGTGGCACGCTACGACTCGTCGAACGA    | 13,55 |
| GGACTGTTCTACATAGTGACTTGACGAGGTT    | 13,71 |
| TCACTGGGCGCTATACAGGAAACTCGAGGGGC   | 15,23 |
| TCCCTGTCTGTCGAGCCAGCGACCACTTCTG    | 15,39 |
| GAGAAAGATGCGGTGGCAGTAGTTGTGATTAG   | 15,55 |
| CTTGGGGGTGATATACCTCACTAAACTCCTTC   | 15,71 |
| GTATGATTTTTTTTTTTTTTTTTTTGTATAGCG  | 0,15  |
| CACCGTTCAACCGTGAACACTGACACCTTTT    | 0,31  |
| ACCCGAGCAAGTGTGTGACAGGGACCACCGCA   | 0,47  |
| ACAGGCGTTGAGACTCAGAGCCGAGGTCAGG    | 0,63  |
| TTTTTTTTTAAGCGTTCGCCCAAGTTTTTTTT   | 0,79  |
| CACTGAGTTTTTTTTTTTTTTTTTGGAAAGGAC  | 2,15  |
| AAGTAAACTACTCGATGGGCTGATCCCGCAAC   | 2,31  |
| ATTTCCGCCATCCCTGCCGAGTAGACGTGC     | 2,47  |
| AGCGAATTGCGGCCATTAGCCCGGCTCCCGGT   | 2,63  |
| TTTTTTTTTCCGGTTAACAGTCTTTTTTTTT    | 2,79  |
| GAGGGAACTTTTTTTTTTTTTTGAGATGCG     | 4,15  |
| TCAGAAACCCTAGCTACATCTTTGGGGTCGT    | 4,31  |
| CCAGGTGAGTTCGGTGACATGAATACTCTGA    | 4,47  |
| GTGGCTGGCCATTATACTGACGGTTAATTG     | 4,63  |
| TTTTTTTTACAGCTAAGCACCGAATTTTTTTT   | 4,79  |
| GTATTAGCTTTTTTTTTTTTTTTGAGCCACT    | 6,15  |
| CCATATCCCGCTCAGCATCCTTCCAACATCTC   | 6,31  |
| GGGGTCACTTCCAGTCAACAGTTGTGCGTTG    | 6,47  |
| TATGATTGCAGTCTCTCTTTACGCGCTTGAAC   | 6,63  |
| TTTTTTTTGTGGGACGCTATCTTTTTTTTT     | 6,79  |
| TTCTTAAATTTTTTTTTTTTTTTTCGCGATC    | 8,15  |
| CGCACGGCTGCGATCACCCAGTGAGCTCGACA   | 8,31  |
| CACCAGAATCAGTCGTGGCATCACCTAGAAAT   | 8,47  |
| ATCGACTAAGTTTTGGTCTTTCTCGTATATCA   | 8,63  |
| TTTTTTTTGAAGCGTATAGCTCCGTTTTTTTT   | 8,79  |
| AGCTTGGGTTTTTTTTTTTTTTTTTAAAAGCCC  | 10,15 |
| AGATGTTCTTATGCTACTTTAGGCCCAAGGAG   | 10,31 |
| CGTTTGTCCAACCAAAAACAGCATGGCTTCAT   | 10,47 |
| ATAATAGTAGGATATGCACGCGAGCTATGTAG   | 10,63 |
| TTTTTTTTATAGCCAGGCATCAGATTTTTTTT   | 10,79 |
| AGTTTCCTTTTTTTTTTTTTTTCTGACAGA     | 12,15 |
| CTAATATAGCCCTCGGATACTTTGAAAAGGC    | 12,31 |
| AACTACTGTGGGTAAGCCAGCCGCGCAGGG     | 12,47 |
| CCAAGTACTAATCAGTGAACACCCCGCTGC     | 12,63 |

|                                  |       |
|----------------------------------|-------|
| TTTTTTTAACTCGTGC GGCCGTTTTTTT    | 12,79 |
| ATTACCGTTTTTTTTTTTTTTGGGGATGA    | 14,15 |
| GTCGCTGGCACCCCGTAACCTGGATAGGACA  | 14,31 |
| CGAGTCGTCAGAAGTGAAAGACTGTGCGAGAT | 14,47 |
| TTAGTGAGTCGTTCGAAGTTCGTATATGCTCT | 14,63 |
| TTTTTTTGAAGGAGTGAGTCGGCTTTTTTTT  | 14,79 |

#### S4.6 XY-4H×4H×128B-cuboid crystal sequences

|                                   |        |
|-----------------------------------|--------|
| CCAGGTAAAGTGGCTCAATCATACTCACGGTT  | 1,23   |
| AACTGTTGTGTCCATGTTTACTTAGGGATGG   | 1,39   |
| TACGAACTCAACGCACGCTCGGGTAGTCTCAA  | 1,55   |
| GAAGATAGAGAGCATAAATTCGCTAAAACCGGA | 1,71   |
| AAAGTATCCGCATCTCACTCAGTGATCGAGTA  | 1,87   |
| TTCATGTCGCCTTTTCGAACGGTGACACACTT  | 1,103  |
| GTGTTCAATCAGAGTAGCGGAAATATGGCCGC  | 1,119  |
| TTCGGTGCAGCAGCGGGCCGCTGTAACGCTTA  | 1,135  |
| ATCAGCCCGGGCTTTTGCTAATACGCTGAGCG  | 3,23   |
| ATGCTGTTGTTGCGGGGTTTCTGAACCGGAAC  | 3,39   |
| CCGGGCTAATGAAGCCGTGACCCAGAGACTG   | 3,55   |
| TCTGATGCACCGGGAGCCAGCCACTTAGCTGT  | 3,71   |
| GTCAGTGTGATCGGAGTTCCCTCTAGCTAGG   | 3,87   |
| GTGATGCCAAAAGGGTGGATATGGAGCTGGAA  | 3,103  |
| CGGCTCTGATTCTAGTGACCTGGTATAATGG   | 3,119  |
| CGGAGCTACCTGACCTCAATCATACTGCCAC   | 3,135  |
| GGAAGGATTCATCCCTTTAAGAAATGATCGCA  | 5,23   |
| CAGTCTTTGAGATGTTGAACATCTTTTGGTTG  | 5,39   |
| GCGTAAAGATCTCGCATTCTGGTGCCAAAAC   | 5,55   |
| GCCGACTCGTTCAAGCACTATATCTGGCTAT   | 5,71   |
| AAAAGATGTCTGTCAGCCAAAGCTTAGCATAA  | 5,87   |
| GCGGCTGGACGACCCCGCGTGCAGCAGCTGA   | 5,103  |
| CCGTCGAGCCCTGCGCGACAAAACGCATATCCT | 5,119  |
| CGGCCCGCCAAATTAATAGTCGATTACGCTTC  | 5,135  |
| GCCTAAAAGGTCCTCCACGGTAATCGGGGGTG  | 7,23   |
| ACTCCGGCCTCCTTGGTATATTAGCTTACCCA  | 7,39   |
| CTCGCGTGGCACGCTACGACTCGTCGAACGA   | 7,55   |
| GGACTGTTCTACATAGTGACTTGGACGAGGTT  | 7,71   |
| TCACTGGGCGCTATACAGGAAACTCGAGGGGC  | 7,87   |
| TCCCTGTCTGTCGAGCCAGCGACCACTTCTG   | 7,103  |
| GAGAAAGATGCGGTGGCAGTAGTTGTGATTAG  | 7,119  |
| CTTGGGGGTGATATACCTCACTAAACTCCTTC  | 7,135  |
| TAATGTGACTAAGCGTTAACTCCAAAGGAAAC  | 9,23   |
| CAGCTATCCCATATTTCGATGTAAGCGGACATC | 9,39   |
| TATGCGCCCGATATCCGTTCAAACCTAGGGGGC | 9,55   |
| TTCTGACCAAAGCTCATGAGAATTGTAAACAG  | 9,71   |
| GAACAGCTTAGAGCAGTCAAGTTCCGATACGC  | 9,87   |
| TACCTATGGACGGGATATGCGACACCATGAT   | 9,103  |
| CCGGATGAGTTATGAAAGATCGTCATTGGGATA | 9,119  |
| TACAATCTCGAAGTAAAGCATAGCACCTGCG   | 9,135  |
| AAGATAGGGTACAGCAGTAATACCTTACCT    | 11,23  |
| TGTTGGACGTAAGCGTGAAATAACGACCAGAA  | 11,39  |
| AGCACGAGGATTATCACGTGTACCTCGAAATA  | 11,55  |
| ATCGTTAGTTTCTCGACTGTTCCGAAACAGGC  | 11,71  |
| AGCGGTAGCCTCCCACTTAACCTATGCCTTGG  | 11,87  |
| TAAGTATTTTCTCCTGGTTCCGCTAGCTGAT   | 11,103 |
| CTATGGTCCTAATATAACCCTCGGAGGCAAG   | 11,119 |
| GGGAGAGGGTGAAACAGGCCACCTGGCTCGGG  | 11,135 |
| GAGTGCCCTCGGCAGCCGCTCGGTTATAC     | 13,23  |
| TCGTCAAGCCTGCTTCCATAGCTAACCCGAT   | 13,39  |
| TGTGCATTCCACGTGAGTCGTAATAAGCAA    | 13,55  |
| ACGTGGGAGTGCCCGAGCGTCTGAGGTATGGT  | 13,71  |
| TTACCCACTATGTTGTCTCAAGTGCTAACAGT  | 13,87  |
| ACTAATTATCCATAACTGTGCACGTCAGGGAT  | 13,103 |
| TCTCACCGGTGGCCGTTGCTACATCAGTTTCT  | 13,119 |
| TTGCACTCCTGGGGAAACTATACTTACGCACT  | 13,135 |
| GGTTTGGAGGGATTAGGCAATTGCTAGGTTGC  | 15,23  |
| ATTGTAGGCACAATTTTGTATTGATCACAATA  | 15,39  |
| CATGGGCAATAAAGCTGTAGCCTGAGGCGCGC  | 15,55  |
| AGCTGCACCGTGTACACCTTGATATTGAGGGAC | 15,71  |
| ACCTCGTCATTCCGATAAACCATACTGAGGGC  | 15,87  |
| AGTGGGCGAGATCGGCTAATCATTAGTGCTCC  | 15,103 |
| CTTAGTTAGTTCATAGTTCATTAGGGGCGGAA  | 15,119 |
| ATGGGCTGGTGCCCCACGTACAGTAACCAACC  | 15,135 |
| GTATGATTTTTTTTTTTTTTTTTTCTAATCCC  | 0,15   |
| TCAGAAACAACCGTGACTTTAGGCCCAAGGAG  | 0,31   |

|                                   |        |
|-----------------------------------|--------|
| ACCCGAGCGTTCGGTCTACAATAGCTTTAT    | 0,47   |
| GTGGCTGGTTGAGACTCACGCGAGCTATGTAG  | 0,63   |
| CACTGAGTACAGCTAAGTGCAGCTATCCGAAT  | 0,79   |
| CCATATCCTACTCGATCCCAGTGAGCTCGACA  | 0,95   |
| ATTTCCGCTTCCAGCTCGCCACTCTATGAAC   | 0,111  |
| TATGATTGGCGGCCATTCTTTCTCGTATATCA  | 0,127  |
| TTTTTTTTGTGGGACGCAGCCATTTTTTTTT   | 0,143  |
| GTATTAGCTTTTTTTTTTTTTTTTTGCGGAGG  | 2,15   |
| AAGTAAACCGCTCAGCATCCTTCCAACATCTC  | 2,31   |
| GGGGTCACCCATCCCTCTTGACGATCACGTGG  | 2,47   |
| AGCGAATTCAGTCTCTTTTACGCGCTTGAAC   | 2,63   |
| GAGGGAACCTCCGGTTTTCCCACGTACAACATA | 2,79   |
| CACCGTTCCTTAGCTACATCTTTTGGGGTCGT  | 2,95   |
| CCAGGTCAAAGTGTGTTAATTAGTACGGCCAC  | 2,111  |
| ACAGGCGGCCATTATACTCGACGGTTAATTTG  | 2,127  |
| TTTTTTTTTAAAGCGTTGAGTGAATTTTTTTT  | 2,143  |
| ATTACCGTTTTTTTTTTTTTTTTTAAAAGCCC  | 4,15   |
| AGATGTTCCACCCCGCCTATCTTACGCTTAC   | 4,31   |
| CGAGTCGTCAACCAAAAACAGCATGGCTTCAT  | 4,47   |
| ATAATAGTTCGTTTCGACTCGTGCTTCGAGAAA | 4,63   |
| AGTTTCCTATAGCCAGGCATCAGATCGCGATC  | 4,79   |
| CGCACGGCGCCCTCGCTACCGCTAGGAGAAA   | 4,95   |
| AACTACTGTCAGTCGTGGCATCCTTAGAAAT   | 4,111  |
| ATCGACTACTAATCACGACCATAGTGTTCAC   | 4,127  |
| TTTTTTTTGAAGCGTATAGCTCCGTTTTTTTT  | 4,143  |
| TTCTTAAATTTTTTTTTTTTTTTGAGCCACT   | 6,15   |
| CTAATATATGCGATCATCACATTAGAATATGG  | 6,31   |
| CACCAGAATGGGTAAGCAACAGTTGTGCGTTG  | 6,47   |
| CCAAGTCAAGTTTTGGGGCGCATATGAGCTTT  | 6,63   |
| AGCTTGGGAACCTCGTCTATCTTCGAGATGCG  | 6,79   |
| GTCGCTGGTTATGCTAAGCTGTTCTCCCGTC   | 6,95   |
| CGTTTGTCCAGAAGTGGACATGAATACTCTGA  | 6,111  |
| TTAGTGAGAGGATATGTCATCCGTTACTTCG   | 6,127  |
| TTTTTTTTGAAGGAGTGCACCGAATTTTTTTT  | 6,143  |
| TGGAGTTATTTTTTTTTTTTTTTGGAAGGAC   | 8,15   |
| GTTATTTTCGTTTCCTTCCAACCAAATGTG    | 8,31   |
| GTTGAACTTCTGGTTCGCCGAGTAGACGTGC   | 8,47   |
| CGGAACAGGCCCTATGCCATGGTGACACG     | 8,63   |
| GAACTTGAGCCTGTTAACAGTCCGTATAGCG   | 8,79   |
| GCGGAACCGGTATCCGACGAGGTGCCGATCT   | 8,95   |
| TGACGATCATCAGCTAGACAGGGACCACCGCA  | 8,111  |
| AGGTGGCCTATCCAATAACTAAGTGGGGCAC   | 8,127  |
| TTTTTTTTCCCGAGCCCCCAAGTTTTTTTT    | 8,143  |
| GTATTACTTTTTTTTTTTTTTTGGGGATGA    | 10,15  |
| CTTACATCAGGTAGAGGGGCACTCAAAGCAGG  | 10,31  |
| GGTACACGGATGTCCGAAAGACTGTGCGAGAT  | 10,47  |
| AATTCATATTTTCAAATGCACATCGGGCAC    | 10,63  |
| TAGGTAACTGTTACGAGTCGGCCTGACAGA    | 10,79  |
| GTCGCATACCAAGGCAGTGGGTAAGTTATGGA  | 10,95  |
| CGAGGTTATCATGGTCCAGCCGCGCAGGG     | 10,111 |
| GCTATGCTCTTGCCCTCCGGTGAGATTCCCCAG | 10,127 |
| TTTTTTTTTCGAGGGTGCGGGCCGTTTTTTTT  | 10,143 |
| GCAATTGCTTTTTTTTTTTTTTTGCTGTGAC   | 12,15  |
| AGCTATGGGCAACCTAGGGCTGATCCCACAAC  | 12,31  |
| CAGGCTACATCGGGTGTCCAACATGATAATC   | 12,47  |
| TCAGACGCGCGCCTTAGCCCGGCTCCCGGT    | 12,63  |
| TATGGTTTACCATAACCCTAACGATGTGGGAGG | 12,79  |
| CGTGACAGCCCTCAGACACTGACACCCTTTT   | 12,95  |
| CTAATGAAATCCCTGAATCAGTTAATATTAAG  | 12,111 |
| AGTATAGTTTTCCGCCAGAGCGAGGTCAGG    | 12,127 |
| TTTTTTTTAGTGGTACCTCTCCCTTTTTTTTT  | 12,143 |
| GAGGCGGCTTTTTTTTTTTTTTACGCTTAG    | 14,15  |
| CGAATCAAGTATAACCTAACCTGGATAGGACA  | 14,31  |
| AGTACGACTATGTGATGATAGCTGGGATATCG  | 14,47  |
| ATATCAAGTTGCTTTAAGTTCGTATATGCTCT  | 14,63  |
| CACTTGAGGTCCCTCAGGTCAGAACTGCTCTA  | 14,79  |
| AATGATTAAGTGTAGGATACTTTGAAAAGGC   | 14,95  |
| ATGTAGCAGGAGCACTCATAGGTATTCATAAC  | 14,111 |



ACTGTACGAGAACTGATGAACACCCCGCTGC  
TTTTTTTTGGTTGGTTAGATTGTATTTTTTTT

14,127  
14,143

#### S4.7 XY-4H×4H×192B-cuboid crystal sequences

|                                   |        |
|-----------------------------------|--------|
| CCAGGTAAAGTGGCTCAATCATACTCACGGTT  | 1,23   |
| AACTGTTGTGTCCATGTTTACTTAGGGATGG   | 1,39   |
| TACGAACTCAACGCACGCTCGGGTAGTCTCAA  | 1,55   |
| GAAGATAGAGAGCATAAATTCGCTAAAACCGGA | 1,71   |
| AAAGTATCCGCATCTCACTCAGTGATCGAGTA  | 1,87   |
| TTCATGTCGCCTTTTCGAACGGTGACACACTT  | 1,103  |
| GTGTTCAATCAGAGTAGCGGAAATATGGCCGC  | 1,119  |
| TTCGGTGCAGCAGCGGGCCGCTGTAACGCTTA  | 1,135  |
| ATCAGCCCGGGCTTTTGCTAATACGCTGAGCG  | 1,151  |
| ATGCTGTTGTTGCGGGGTTTCTGAACCGGAAC  | 1,167  |
| CCGGGCTAATGAAGCCGTGACCCAGAGACTG   | 1,183  |
| TCTGATGCACCGGGAGCCAGCCACTTAGCTGT  | 1,199  |
| GTCAGTGTGATCGCGAGTTCCCTTAGCTAGG   | 3,23   |
| GTGATGCCAAAAGGGTGGATATGGAGCTGGAA  | 3,39   |
| CGGCTCTGATTCTAGTGACCTGGTATAATGG   | 3,55   |
| CGGAGCTACCTGACCTCAATCATACTGCCAC   | 3,71   |
| GGAAGGATTCATCCCTTTAAGAAATGATCGCA  | 3,87   |
| CAGTCTTTGAGATGTTGAACATCTTTTGGTTG  | 3,103  |
| GCGTAAAGATCTCGCATTCTGGTGCCAAAAC   | 3,119  |
| GCCGACTCGTTCAAGCACTATATCTGGCTAT   | 3,135  |
| AAAAGATGTCTGTCAGCCCAAGCTTAGCATAA  | 3,151  |
| GCGGCTGGACGACCCCGCGTGCAGCAGCTGA   | 3,167  |
| CCGTCGAGCCCTGCGCGACAAAACGCATATCCT | 3,183  |
| CGGCCCGCCAAATTAATAGTCGATTACGCTTC  | 3,199  |
| GCCTAAAAGTCCCTCCACGGTAATCGGGGGTG  | 5,23   |
| ACTCCGGCCTCCTTGGTATATTAGCTTACCCA  | 5,39   |
| CTCGCGTGGCACGCTACGACTCGTCGAACGA   | 5,55   |
| GGACTGTTCTACATAGTGACTTGACGAGGTT   | 5,71   |
| TCACTGGGCGCTATACAGGAAACTCGAGGGGC  | 5,87   |
| TCCCTGTCTGTCGAGCCAGCGACCACTTCTG   | 5,103  |
| GAGAAAGATGCGGTGGCAGTAGTTGTGATTAG  | 5,119  |
| CTTGGGGGTGATATACCTCACTAAACTCCTTC  | 5,135  |
| TAATGTGACTAAGCGTTAACTCCAAAGGAAAC  | 5,151  |
| CAGCTATCCCATATTTCGATGTAAGCGGACATC | 5,167  |
| TATGCGCCGATATCCGTTCAAACCTAGGGGGC  | 5,183  |
| TTCTGACCAAAGCTCATGAGAATTGTAAACAG  | 5,199  |
| GAACAGCTTAGAGCAGTCAAGTTCGGATACGC  | 7,23   |
| TACCTATGGACGGGATATGCGACACCATGAT   | 7,39   |
| CCGGATGAGTTATGAAGATCGTCATTGGGATA  | 7,55   |
| TACAATCTCGAAGTAAAGCATAGCACCTGCG   | 7,71   |
| AAGATAGGGTACAGCAGTAATACCTTACCT    | 7,87   |
| TGTTGGACGTAAGCGTGAAATAACGACCAGAA  | 7,103  |
| AGCACGAGGATTATCACGTGTACCTCGAAATA  | 7,119  |
| ATCGTTAGTTTCTCGACTGTTCCGAAACAGGC  | 7,135  |
| AGCGGTAGCCTCCCACTTAACCTATGCCCTGG  | 7,151  |
| TAAGTATTTTCTCCTGGTTCCGCTAGCTGAT   | 7,167  |
| CTATGGTCCCTAATATAACCCTCGGAGGCAAG  | 7,183  |
| GGGAGAGGGTGAAACAGGCCACCTGGCTCGGG  | 7,199  |
| GAGTGCCCTCGGCAGCCGCTCGGTTATAC     | 9,23   |
| TCGTCAAGCCTGCTTCCATAGCTAACCCGAT   | 9,39   |
| TGTGCATTCCACGTGAGTCGTAATAAGCAA    | 9,55   |
| ACGTGGGAGTGCCCGAGCGTCTGAGGTATGGT  | 9,71   |
| TTACCCACTATGTTGTCTCAAGTGCTAACAGT  | 9,87   |
| ACTAATTATCCATAACTGTGCACGTCAGGGAT  | 9,103  |
| TCTCACCGGTGGCCGTGCTACATCAGTTTCT   | 9,119  |
| TTGCACTCCTGGGGAAACTATACTTACGCACT  | 9,135  |
| GGTTTGGAGGGATTAGGCAATTGCTAGGTTGC  | 9,151  |
| ATTGTAGGCACAATTTTGTGATTCGATCACATA | 9,167  |
| CATGGGCAATAAAGCTGTAGCCTGAGGCGCGC  | 9,183  |
| AGCTGCACCGTGTACACCTTGATATTGAGGGAC | 9,199  |
| ACCTCGTCATTCCGATAAACCATACTGAGGGC  | 11,23  |
| AGTGGGCGAGATCGGCTAATCATTAGTGCTCC  | 11,39  |
| CTTAGTTAGTTCATAGTTCATTAGGGGCGGAA  | 11,55  |
| ATGGGCTGGTGCCCAACGTACAGTAACCAACC  | 11,71  |
| GGTGTACCTGTGGGTAGGGCCGAGCGCTGGGC  | 11,87  |
| TTACATGTGCAAGTGAATATATGACTTGGTC   | 11,103 |

|                                   |        |
|-----------------------------------|--------|
| GACCAGATCTGCTAGAAACCACCAACATCCTC  | 11,119 |
| CTTGACACCTTTCAATTTTTAGTAAACACCCA  | 11,135 |
| ACAGAGCTGAACTTCCCATGGTCGTTCTACTG  | 11,151 |
| TCGTATGATCATAGGATCAAACTAAATACAGC  | 11,167 |
| GTACCGCCAGTTCTTGTCTTATTGGCGATCG   | 11,183 |
| TGCATTCCAATGTTTGATGGCCGCGTGGCTTA  | 11,199 |
| TTAAGACGGCCGGTGTAAACCACATAAAGTCGT | 13,23  |
| CCGCCTCCGGTAGTCAACGCGGAACGTAATGG  | 13,39  |
| CAGAAAGTCTATACCCGACAAAAACAGATTTG  | 13,55  |
| TACCGGGGTGAACAGCACGTGCGGCTTCTCCT  | 13,71  |
| GTATCGCCTTGTGTATTATACTTTGCGGGGG   | 13,87  |
| GGTCGAGCGCTCCACTGTAGTGGCCGCCATC   | 13,103 |
| GTGGACTAGAAAAGCGCCGCAATCTGAATATC  | 13,119 |
| GCTACCTCCGATACGGAACCAGAACCATTTA   | 13,135 |
| AGAGTAGGGCAGTGCTCAGCCAAACAGTGGG   | 13,151 |
| ACATCTCGGAAAGGTGTCCCAAGTGCAAGTAA  | 13,167 |
| AAAAGGAATTATGAGATCATGTGGGATCCTAA  | 13,183 |
| AGTTTCTGGTAGACCTCGTAGGCTAGAGCGGT  | 13,199 |
| GATATCCACGGTACATTCGTTTACTGCACGGA  | 15,23  |
| ACGAGAGTGCTGGCATAAGCAAGAGAAAACCTA | 15,39  |
| ACTTGGGGACTAAGATCGTTGCGAATTTTCGC  | 15,55  |
| GCGATTTCGCATGTAGCCGAACGAGATCGTCCT | 15,71  |
| AGACGACGGATCTCCTGCATGCCGGTAGCACC  | 15,87  |
| GTCAAATATGCGTGCTTTTAAACGCTTTAGACC | 15,103 |
| CAGCTTGACGCAAGACGCTAATCACTGGGCAG  | 15,119 |
| GGTCCTAGGTTGCAGAAAACCTACCCCTAAGC  | 15,135 |
| AGCGTAGTAAAGGGTTACAAGTTCTTGCGGCGG | 15,151 |
| CTGTACGAATGAGTCCGGCCTTGACATGACAT  | 15,167 |
| TCTCCACCCGTCCAACACCAGCAGGATGTCCG  | 15,183 |
| AGCCCAAACTTGACAGTAGTACAGTATCTTT   | 15,199 |
| GTATGATTTTTTTTTTTTTTTTTTATGTACCG  | 0,15   |
| CCATATCCAACCGTGAAGCTGTCTCCCGTC    | 0,31   |
| ACCCGAGCTTCCAGCTACTCTCGTATCTTAGT  | 0,47   |
| TATGATTGTTGAGACTTCATCCGGTACTTCG   | 0,63   |
| CACTGAGTGTGGGACGCGAATCGCAGGAGATC  | 0,79   |
| AGATGTTCTACTCGATCCTATCTTACGCTTAC  | 0,95   |
| ATTTCCGCCAACCAATATTTGACGTCTTGCG   | 0,111  |
| ATAATAGTGGGCCATCTCGTGCTTCGAGAAA   | 0,127  |
| GTATTAGCATAGCCAGCTAGGACCTAACCCCT  | 0,143  |
| CGCACGGCCGCTCAGCCTACCGCTAGGAGAAA  | 0,159  |
| GGGGTCACTCAGTCGTTCTGTACAGTTGGACGG | 0,175  |
| ATCGACTACAGTCTCTGACCATAGTGTTCAC   | 0,191  |
| TTTTTTTTGAAGCGTATGTGGCTTTTTTTTT   | 0,207  |
| GAGGGAACTTTTTTTTTTTTTACACCGGC     | 2,15   |
| AAGTAAACCCTAGCTACTTTAGGCCAAGGAG   | 2,31   |
| CCAGGTACCATCCCTGGAGGCGGGGTATAG    | 2,47   |
| AGCGAATTCCATTATACACGCGAGCTATGTAG  | 2,63   |
| TTCTTAAATCCGGTTTCCCGGTAATACACAA   | 2,79   |
| CACCGTTCTGCGATCACCCAGTGAGCTCGACA  | 2,95   |
| CACCAGAAAAGTGTGTGTCGACCCGCGCTTTC  | 2,111  |
| ACAGGCGGAGTTTTGGTCTTTCTCGTATATCA  | 2,127  |
| AGCTTGGGTAAGCGTTGAGGTAGCGCACTGCC  | 2,143  |
| TCAGAAACTTATGCTATCACATTAGAATATGG  | 2,159  |
| CGTTTGTGCTCCGGTCGAGATGTTCTCATAA   | 2,175  |
| GTGGCTGGAGGATATGGGCGCATATGAGCTTT  | 2,191  |
| TTTTTTTTACAGCTAACAGAACTTTTTTTTT   | 2,207  |
| GAACCTGATTTTTTTTTTTTTTTTCGCGATC   | 4,15   |
| CTAATATAGCGTATCCGACGAGGTGCCGATCT  | 4,31   |
| TGACGATCTGGGTAAGGGCATCACCTAGAAAT  | 4,47   |
| CCAAGTCAATATCCCAATAACTAAGTGGGGCAC | 4,63   |
| GTATTACTAACCTCGTTAGCTCCGGGGGATGA  | 4,79   |
| GTCGCTGGAGGTAGAGGGTACACCTCACTTGC  | 4,95   |
| GGTACACGCAGAAGTGAAGACTGTGCGAGAT   | 4,111  |
| TTAGTGAGTATTTCAATCTGGTCATTGAAAAG  | 4,127  |
| TAGGTAAAGAAGGAGTGAGTCGGCCTGACAGA  | 4,143  |
| CTTACATCCCAAGGCAAGCTCTGTTCTATGA   | 4,159  |
| CGAGGGTTGATGTCCGCCAGCCGCGCAGGG    | 4,175  |
| AATTCTCACTTGCTCGGCGGTACCAAACATT   | 4,191  |

|                                   |        |
|-----------------------------------|--------|
| TTTTTTTCTGTTTACGCGGGCCGTTTTTTTT   | 4,207  |
| ATTACCGTTTTTTTTTTTTTTTTTTGAGCCACT | 6,15   |
| GTCGCATACACCCCGGGGCACTCAAAGCAGG   | 6,31   |
| CGAGTCGTATCATGGTCAACAGTTGTGCGTTG  | 6,47   |
| GCTATGCTTCGTTTCGAAATGCACATCGGGCAC | 6,63   |
| AGTTTCCTCGCAGGGTCTATCTTCGAGATGCG  | 6,79   |
| GTTATTTCCGCCCTCGGTGGGTAAGTTATGGA  | 6,95   |
| AACTACTGTTCTGGTCGACATGAATACTCTGA  | 6,111  |
| CGGAACAGCTAATCACCGGTGAGATTCCCCAG  | 6,127  |
| TGGAGTTAGCCTGTTTGCACCGAAAAAGCCC   | 6,143  |
| GCGGAACCGTTTCCTTTCCAAACCAAATTGTG  | 6,159  |
| GTTTGAACATCAGCTAAACAGCATGGCTTCAT  | 6,175  |
| AGGTGGCCGCCCCCTATGCCCATGGTGACACG  | 6,191  |
| TTTTTTTTCCCGAGCCGCATCAGATTTTTTTTT | 6,207  |
| GAGGCGGCTTTTTTTTTTTTTTTCTGCTCTA   | 8,15   |
| AATGATTAGTATAACCTGGATATCATGCCAGC  | 8,31   |
| AGTACGACGGAGCACTCATAGGTATTCATAAC  | 8,47   |
| ACTGTACGTTGCTTTACCCCAAGTGCTACATG  | 8,63   |
| CACTTGAGGGTTGGTTAGATTGTAGCTGTGAC  | 8,79   |
| CATATATACTGTTAGCGTCGCTAGCACGCA    | 8,95   |
| ATGTAGCAGACCAAGTGTCCAACATGATAATC  | 8,111  |
| TACTAAAAAGAAACTGTCAAGCTGTCTGCAAC  | 8,127  |
| GCAATTGCTGGGTGTTCTAACGATGTGGGAGG  | 8,143  |
| TAGTTTGAGCAACCTAACTACGCTGGACTCAT  | 8,159  |
| CAGGCTACGCTGTATTATCAGTTAATATTAAG  | 8,175  |
| GCGGCCATGCGCGCCTGTGGGAGATGTCAAGT  | 8,191  |
| TTTTTTTTTAAGCCACCCCTCTCCCTTTTTTTT | 8,207  |
| TATGGTTTTTTTTTTTTTTTTTTTGGAAAGGAC | 10,15  |
| AGCTATGGGCCCTCAGCGTCTAATGACTACC   | 10,31  |
| CTAATGAAATCGGGTTGCCGGAGTAGACGTGC  | 10,47  |
| TCAGACGCTTCCGCCCACTTTCTGGCTGTTCA  | 10,63  |
| CTCGGCCACCATACCAACAGTCCGTATAGCG   | 10,79  |
| CGTGACAGCCAGCGGGCGATACAGTGGAGC    | 10,95  |
| TGGTGGTTATCCCTGAGACAGGGACCACCGCA  | 10,111 |
| AGTATAGTGAGGATGTTAGTCCACGCGTATCG  | 10,127 |
| CGACCATGAGTGCGTACCCCAAGACGCTTAG   | 10,143 |
| CGAATCAACAGTAGAACCTACTCTACCTTTC   | 10,159 |
| AATAAGGATATGTGATGATAGCTGGGATATCG  | 10,175 |
| ATATCAAGCGATCGCCTTCCTTTTAGGTCTAC  | 10,191 |
| TTTTTTTTGTCCCTCAGGTCAGAATTTTTTTT  | 10,207 |
| GTAAACGATTTTTTTTTTTTTTTTATCCGAAT  | 12,15  |
| TTCCGCGTTCGCGTCAACACTGACACCCTTTT  | 12,31  |
| TCGCAACGCCATTACGCGCCACTCTATGAAC   | 12,47  |
| CCGCACGTGCGAAAATCAGAGCCGAGGTCAGG  | 12,63  |
| CGGCATGCAGGAGAAGCAGCCCATTACCCACA  | 12,79  |
| GCCACTACGGTGCTACATCCTTCCAACATCTC  | 12,95  |
| TGATTAGCGATGGCCGACATGTAATCTAGCAG  | 12,111 |
| TCTGGTTCCTGCCAGCTTTACGCGCTTGAAC   | 12,127 |
| GGAACCTGTAATGGTGTGTCAAGGGAAGTTC   | 12,143 |
| ACTTGGGACCGCCGCACATCTTTGGGGTCGT   | 12,159 |
| TGCTGGTGTTACTTGCTCATACGACAAGAACT  | 12,175 |
| AGCCTACGCGACATCCCTCGACGGTTAATTTG  | 12,191 |
| TTTTTTTTACCGCTCTGGAATGCATTTTTTTT  | 12,207 |
| ATGTGGTTTTTTTTTTTTTTTTTTTGGCCGAGG | 14,15  |
| TCTTGCTTACGACTTTTAACTGGATAGGACA   | 14,31  |
| TTTTGTCTAGGTTTCCTTGACGATCACGTGG   | 14,47  |
| CTCGTTCGCAAATCTGAGTTCGTATATGCTCT  | 14,63  |
| AGAGTATAAGGACGATTTCCACGTACAACATA  | 14,79  |
| GCGTTAAACCCCGCAGATACTTTGAAAAGGC   | 14,95  |
| GATTGCCGGGTCTAAATAATTAGTACGGCCAC  | 14,111 |
| GGTAGGTTGATATTCAATGAACACCCCGCTGC  | 14,127 |
| TTGGCTGAGCTTAGGGGAGTGCAACTAATCCC  | 14,143 |
| TCAAGGCCCCCACTGTGGGCTGATCCC GCAAC | 14,159 |
| CCACATGAATGTCATGCCTACAATAGCTTAT   | 14,175 |
| TGTACTACTTAGGATCTAGCCCGGCTCCCGGT  | 14,191 |
| TTTTTTTTAAAGATACGTGCAGCTTTTTTTTTT | 14,207 |

#### S4.8 XY-4H×4H×256B-cuboid crystal sequences

|                                   |       |
|-----------------------------------|-------|
| CCAGGTAAAGTGGCTCAATCATACTCACGGTT  | 1,23  |
| AACTGTTGTGTCCATGTTTACTTAGGGATGG   | 1,39  |
| TACGAACTCAACGCACGCTCGGGTAGTCTCAA  | 1,55  |
| GAAGATAGAGAGCATAAATTCGCTAAAACCGGA | 1,71  |
| AAAGTATCCGCATCTCACTCAGTGATCGAGTA  | 1,87  |
| TTCATGTCGCCTTTTCGAACGGTGACACACTT  | 1,103 |
| GTGTTCAATCAGAGTAGCGGAAATATGGCCGC  | 1,119 |
| TTCGGTGCAGCAGCGGGCCGCTGTAACGCTTA  | 1,135 |
| ATCAGCCCGGGCTTTTGCTAATACGCTGAGCG  | 1,151 |
| ATGCTGTTGTTGCGGGGTTTCTGAACCGGAAC  | 1,167 |
| CCGGGCTAATGAAGCCGTGACCCAGAGACTG   | 1,183 |
| TCTGATGCACCGGGAGCCAGCCACTTAGCTGT  | 1,199 |
| GTCAGTGTGATCGGAGTTCCTCTAGCTAGG    | 1,215 |
| GTGATGCCAAAAGGGTGGATATGGAGCTGGAA  | 1,231 |
| CGGCTCTGATTCTAGTGACCTGGTATAATGG   | 1,247 |
| CGGAGCTACCTGACCTCAATCATACTGCCAC   | 1,263 |
| GGAAGGATTCATCCCTTTAAGAATGATCGCA   | 3,23  |
| CAGTCTTTGAGATGTTGAACATCTTTTGGTTG  | 3,39  |
| GCGTAAAGATCTCGCATTCTGGTGCCAAAAC   | 3,55  |
| GCCGACTCGTTCAAGCACTATATCTGGCTAT   | 3,71  |
| AAAAGATGTCTGTCAGCCCAAGCTTAGCATAA  | 3,87  |
| GCGGCTGGACGACCCCGCGTGCAGCAGCTGA   | 3,103 |
| CCGTCGAGCCCTGCGCGACAAAACGCATATCCT | 3,119 |
| CGGCCCGCCAAATTAATAGTCGATTACGCTTC  | 3,135 |
| GCCTAAAAGGTCCTCCACGGTAATCGGGGGTG  | 3,151 |
| ACTCCGGCCTCCTGGTATATTAGCTTACCCA   | 3,167 |
| CTCGCGTGGCACGCTACGACTCGTCGAACGA   | 3,183 |
| GGACTGTTCTACATAGTGACTTGACGAGGTT   | 3,199 |
| TCACTGGGCGCTATACAGGAAACTCGAGGGGC  | 3,215 |
| TCCCTGTCTGTCGAGCCCAGCGACCACTTCTG  | 3,231 |
| GAGAAAGATGCGGTGGCAGTAGTTGTGATTAG  | 3,247 |
| CTTGGGGGTGATATACCTCACTAAACTCCTTC  | 3,263 |
| TAATGTGACTAAGCGTTAACTCCAAAGGAAAC  | 5,23  |
| CAGCTATCCCATATTTCGATGTAAGCGGACATC | 5,39  |
| TATGCGCCGATATCCGTTCAAACCTAGGGGGC  | 5,55  |
| TTCTGACCAAAGCTCATGAGAATTGTAAACAG  | 5,71  |
| GAACAGCTTAGAGCAGTCAAGTTCGGATACGC  | 5,87  |
| TACCTATGGACGGGATATGCGACACCATGAT   | 5,103 |
| CCGGATGAGTTATGAAAGATCGTCATTGGGATA | 5,119 |
| TACAATCTCGAAGTAAAGCATAGCACCCCTGCG | 5,135 |
| AAGATAGGGTACAGCAGTAATACCTCTACCT   | 5,151 |
| TGTTGGACGTAAGCGTGAAATAACGACCAGAA  | 5,167 |
| AGCACGAGGATTATCACGTGTACCTCGAAATA  | 5,183 |
| ATCGTTAGTTTCTCGACTGTTCCGAAACAGGC  | 5,199 |
| AGCGGTAGCCTCCCACTTAACCTATGCCTTGG  | 5,215 |
| TAAC TGATTTTCTCCTGGTTCCGCTAGCTGAT | 5,231 |
| CTATGGTCCTAATATAACCCTCGGAGGCAAG   | 5,247 |
| GGGAGAGGGTGAAACAGGCCACCTGGCTCGGG  | 5,263 |
| GAGTGCCCTCGGCAGCCGCTCGGTTATAC     | 7,23  |
| TCGTCAAGCCTGCTTCCATAGCTAACCCGAT   | 7,39  |
| TGTGCATTCCACGTGAGTCGTACTTAAAGCAA  | 7,55  |
| ACGTGGGAGTGCCCGAGCGTCTGAGGTATGGT  | 7,71  |
| TTACCCACTATGTTGTCTCAAGTGCTAACAGT  | 7,87  |
| ACTAATTATCCATAACTGTGCACGTCAGGGAT  | 7,103 |
| TCTCACCGGTGGCCGTGTACATCAGTTTCT    | 7,119 |
| TTGCACTCCTGGGGAAACTATACTTACGCACT  | 7,135 |
| GGTTTGGAGGGATTAGGCAATTGCTAGGTTGC  | 7,151 |
| ATTGTAGGCACAATTTTGATTGATCACAATA   | 7,167 |
| CATGGGCAATAAAGCTGTAGCCTGAGGCGCGC  | 7,183 |
| AGCTGCACCGTGTACACCTTGATATTGAGGGAC | 7,199 |
| ACCTCGTCATTCCGATAAACCATACTGAGGGC  | 7,215 |
| AGTGGGCGAGATCGGCTAATCATTAGTGCTCC  | 7,231 |
| CTTAGTTAGTTCATAGTTCATTAGGGGCGGAA  | 7,247 |
| ATGGGCTGGTGCCCCACGTACAGTAACCAACC  | 7,263 |
| GGTGACTGTGGGTAGGGCCGAGCGCTGGGC    | 9,23  |
| TTACATGTGCAAGTGAAATATATGACTTGGTC  | 9,39  |

|                                    |        |
|------------------------------------|--------|
| GACCAGATCTGCTAGAAACCACCAACATCCTC   | 9,55   |
| CTTGACACCTTTCAATTTTTAGTAAACACCCA   | 9,71   |
| ACAGAGCTGAACTTCCCATGGTCGTTCTACTG   | 9,87   |
| TCGTATGATCATAGGATCAAACTAAATACAGC   | 9,103  |
| GTACCGCCAGTTCTTGTCTTATTGGCGATCG    | 9,119  |
| TGCATTCCAATGTTTGATGGCCGCGTGGCTTA   | 9,135  |
| TTAAGACGGCCGGTGTAAACCACATAAAAGTCGT | 9,151  |
| CCGCCTCCGGTAGTCAACGCGGAACGTAATGG   | 9,167  |
| CAGAAAGTCTATACCCGACAAAAACAGATTTG   | 9,183  |
| TACCGGGGTGAACAGCACGTGCGGCTTCTCCT   | 9,199  |
| GTATCGCCTTGTGTATTATACTCTTGGCGGGG   | 9,215  |
| GGTCGAGCGCTCCACTGTAGTGGCCGGCCATC   | 9,231  |
| GTGGACTAGAAAAGCGCCGCAATCTGAATATC   | 9,247  |
| GCTACCTCCGATACGGAACCAGAACCATTTA    | 9,263  |
| AGAGTAGGGCAGTGCTCAGCCAAACAGTGGG    | 11,23  |
| ACATCTCGGAAAGGTGTCCCAAGTGCAAGTAA   | 11,39  |
| AAAAGGAATTATGAGATCATGTGGGATCCTAA   | 11,55  |
| AGTTTCTGGTAGACCTCGTAGGCTAGAGCGGT   | 11,71  |
| GATATCCACGGTACATTCGTTTACTGCACGGA   | 11,87  |
| ACGAGAGTGCTGGCATAAGCAAGAGAAAACCTA  | 11,103 |
| ACTTGGGGACTAAGATCGTTGCGAATTTTCGC   | 11,119 |
| GCGATTTCGCATGTAGCCGAACGAGATCGTCCT  | 11,135 |
| AGACGACGGATCTCCTGCATGCCGGTAGCACC   | 11,151 |
| GTCAAATATGCGTGCTTTTAAACGCTTTAGACC  | 11,167 |
| CAGCTTGACGCAAGACGCTAATCACTGGGCAG   | 11,183 |
| GGTCCTAGGTTGCAGAAAACCTACCCCTAAGC   | 11,199 |
| AGCGTAGTAAAGGTTACAAGTTCCTGCGGCGG   | 11,215 |
| CTGTACGAATGAGTCCGGCCTTGACATGACAT   | 11,231 |
| TCTCCACCCGTCCAACACCAGCAGGATGTCG    | 11,247 |
| AGCCCAAACTTGACAGTAGTACAGTATCTTT    | 11,263 |
| TTTCATGGCGGGGATGTCGCCGTTTGCTCGCG   | 13,23  |
| TGCGTACGGCTTTATATAGCGTAGACCCGGAC   | 13,39  |
| AACCCCGTAAATCGTAAAGAGTCGTTATGCCCC  | 13,55  |
| CCGGTCTGCTAGAGTGGGACTGGATCAGATG    | 13,71  |
| TTCAAGTATTCGGTGACCTCCCCGCATTACAA   | 13,87  |
| CGCGCTTACCAAGTAAACGTATGTACGACGCGA  | 13,103 |
| TGCGAGTGAACGGGTGGATGAATTTGTTTCGG   | 13,119 |
| GGCCAGGCGATCTAAGTCTGGCGCGTGAGGAC   | 13,135 |
| ACGTAAGTTGAAGTAGGAAGCTTTTCTAGCC    | 13,151 |
| ATAGCATCGACACTACGACCTGCTTTTCGACA   | 13,167 |
| CGGACTGCATTCTGGACAGTAACTGCATTAAC   | 13,183 |
| TACGTGCTCCCAACATAAGTGACGTCCTCAGC   | 13,199 |
| AGTTGAAAATTATCTCGATAAGCAGAAGGACC   | 13,215 |
| TGTATAACTGGCAAGAGACAAGGCCGCTTCAG   | 13,231 |
| AAAGGATAGCCGGACCGTATTAATGCCGCGCC   | 13,247 |
| AACGGTTTCCCGACCTAGTGTCTATCAAGTC    | 13,263 |
| TATTCTATGAAACCATTCTCGGGTTCGAGCGGG  | 15,23  |
| TCACTGTTGTGACCTACGAGAAGCGTATAGAT   | 15,39  |
| GTTCCGCGGAATAGCTCACAGGCGAACTACG    | 15,55  |
| TATGAATTGGTTTAAACGTCCTCGGGAATTA    | 15,71  |
| ATACGACAGGTGGCAAACCACCTCCGATGTCA   | 15,87  |
| GCGCCGCATACCCATTCACTGTGAATTTCCAC   | 15,103 |
| ACCGAGGATTCGCAGGTCCATGGGATTCACCA   | 15,119 |
| AGCTCGTATACACCCTGATTCCTCATGGCAGC   | 15,135 |
| GCTTCGGTACAGGTCTGAACTGGTAGATCACC   | 15,151 |
| ATTAGTGTACCCAGCAGTTCGGCTCCCTTGTG   | 15,167 |
| GACTCGGATACCCGGTCTGTCGTGTAATGCTG   | 15,183 |
| TTCCGGGGTAAATCAAGCTTTATAAATTCCCG   | 15,199 |
| ACGCTCTGTTCCAAACTTTAGAGCCCGGCCGT   | 15,215 |
| AATCTCGGATTCTTAAAAACAGGCGCAATC     | 15,231 |
| TCATGGCATAAACGAAACCAATCATAACGAGC   | 15,247 |
| GTGGAGGGAAGTTATTCTACTGGCGTTTTCAT   | 15,263 |
| GTATGATTTTTTTTTTTTTTTTTTATGGTTTC   | 0,15   |
| AGATGTTCAACCGTAGGGCACTCAAAGCAGG    | 0,31   |
| ACCCGAGCCAACCAAAAAACAGTGAGCTATTCG  | 0,47   |
| ATAATAGTTTGAGACTAATGCACATCGGGCAC   | 0,63   |
| CACTGAGTATAGCCAGAATTCATATTGCCACC   | 0,79   |
| CGCACGGCTACTCGATGTGGGTAAGTTATGGA   | 0,95   |

|                                   |       |
|-----------------------------------|-------|
| ATTCCGCTCAGTCGTTGCGGCGCCCTGCGAA   | 0,111 |
| ATCGACTAGCGGCCATCGGTGAGATTCCCCAG  | 0,127 |
| GTATTAGCGAAGCGTATACGAGCTAGACCTGT  | 0,143 |
| CTAATATACGCTCAGCTCCAAACCAAATTGTG  | 0,159 |
| GGGGTCACTGGGTAAGACACTAATCCGGGTAT  | 0,175 |
| CCAAGTCACAGTCTCTTGCCCATGGTGACACG  | 0,191 |
| GAGGGAACAACCTCGTCCCCGGAAGTTTGGA   | 0,207 |
| GTCGCTGGCCTAGCTAGACGAGGTGCCGATCT  | 0,223 |
| CCAGGTACAGAAAGTGCCGAGATTTTCGTTTA  | 0,239 |
| TTAGTGAGCCATTATATAACTAAGTGGGGCAC  | 0,255 |
| TTTTTTTTGAAGGAGTCCCTCCACTTTTTTTT  | 0,271 |
| TTCTTAAATTTTTTTTTTTTTTTCATCGCCG   | 2,15  |
| AAGTAAACTGCGATCATCATTAGAATATGG    | 2,31  |
| CACCAGAACCATCCCTCGTACGCATACGATTT  | 2,47  |
| AGCGAATAGTTTTGGGGCGCATATGAGCTTT   | 2,63  |
| AGCTTGGGTCCGGTTAGAACCGGTACCCGAA   | 2,79  |
| CACCGTCTTATGCTAAGCTGTTCTCCCCGTC   | 2,95  |
| CGTTTGTCAAGTGTGTTAAGCGCGCACCCGTT  | 2,111 |
| ACAGGCGGAGGATATGTCATCCGGTACTTTCG  | 2,127 |
| ATTACCGTTAAGCGTTGCCTGGCCCTACTTCA  | 2,143 |
| TCAGAAACCACCCCGCTATCTTACGCTTAC    | 2,159 |
| CGAGTCGTGTTCCGGTGATGCTATTCCAGAAT  | 2,175 |
| GTGGCTGGTCGTTGACTCGTGCTTCGAGAAA   | 2,191 |
| AGTTTCTACAGCTAAAGCACGTAGAGATAAT   | 2,207 |
| CCATATCCGCCCTCGTACCCTAGGAGAAA     | 2,223 |
| AACTACTGTTCCAGCTGTTATACAGGTCCGGC  | 2,239 |
| TATGATTGCTAATCACGACCATAGTGTTCAC   | 2,255 |
| TTTTTTTTGTGGACGAAACCGTTTTTTTTTTT  | 2,271 |
| GAGGCGGCTTTTTTTTTTTTTTTGGGGATGA   | 4,15  |
| CTTACATCGTATAACCCCTACTCTCACCTTTC  | 4,31  |
| AGTACGACGATGCCGAAAGACTGTGCGAGAT   | 4,47  |
| AATTCTCATTGCTTATTCCTTTTAGGCTAC    | 4,63  |
| CACTTGAGCTGTTACGAGTCGGCCTGACAGA   | 4,79  |
| GTCGCATAACTGTTAGTGGATATCATGCCAGC  | 4,95  |
| ATGTAGCAATCATGGTCCAGCCGCGCGCAGGG  | 4,111 |
| GCTATGCTAGAACTGCCCAAGTGCTACATG    | 4,127 |
| GCAATTGCCGAGGGTGCGGGCCGGAAGGAC    | 4,143 |
| GTTATTTGCAACCTACGTCGTCTAGCACGCA   | 4,159 |
| CAGGCTACTTCTGGTCCCGGAGTAGACGTGC   | 4,175 |
| CGGAACAGGCGCGCCTTCAAGCTGTCTGCAAC  | 4,191 |
| TATGGTTTTGCCGTGTTAACAGTCCGTATAGCG | 4,207 |
| GCGGAACCGCCCTCAGACTACGCTGGACTCAT  | 4,223 |
| CTAATGAAATCAGCTAGACAGGGACCACCGCA  | 4,239 |
| AGGTGGCCTTCCGCCCGTGGGAGATGTCAAGT  | 4,255 |
| TTTTTTTTCCCGAGCCCCCAAGTTTTTTTTT   | 4,271 |
| TGGAGTATTTTTTTTTTTTTTTGAGCCACT    | 6,15  |
| AGCTATGGGTTTCCTTGGTACACCTCACTTGC  | 6,31  |
| GTTTGAACATCGGGTTCAACAGTTGTGCGTTG  | 6,47  |
| TCAGACGCGCCCCAATCTGGTCAATTGAAAG   | 6,63  |
| GAACTTGAACCATACCCTATCTTCGAGATGCG  | 6,79  |
| CGTGACAGCGTATCCAGCTCTGTTCCTATGA   | 6,95  |
| TGACGATCATCCCTGAGACATGAATACTCTGA  | 6,111 |
| AGTATAGTTATCCCAAGGCGGTACCAAACATT  | 6,127 |
| GTATTACTAGTGCCTAGCACCGAAAAAAGCCC  | 6,143 |
| CGAATCAAAGGTAGAGCGTCTTAATGACTACC  | 6,159 |
| GGTACACGTATGTGATAACAGCATGGCTTCAT  | 6,175 |
| ATATCAAGTATTTGAACTTTCTGGCTGTTCA   | 6,191 |
| TAGGTAAAGTCCCTCAGCATCAGATCGCGATC  | 6,207 |
| AATGATTACCAAGGCAGGCGATACAGTGGAGC  | 6,223 |
| CGAGGGTTGGAGCACTGGCATCACCTAGAAAT  | 6,239 |
| ACTGTACGCTTGCCTCTAGTCCACGCGTATCG  | 6,255 |
| TTTTTTTTGGTTGGTTAGCTCCGTTTTTTTTT  | 6,271 |
| CTCGGCCCTTTTTTTTTTTTTTTTGGCCGAGG  | 8,15  |
| ACTTGGGAGCCAGCGATAGAATATAGGTCAC   | 8,31  |
| TGGTGGTTTTACTTGCCTTGACGATCACGTGG  | 8,47  |
| AGCCTACGGAGGATGTCGCGGAACTTTAAACC  | 8,63  |
| CGACCATGACCGCTCTCCCACGTACAACATA   | 8,79  |
| TCTTGCTCAGTAGAATGTCGTATAATGGGTA   | 8,95  |

|                                   |        |
|-----------------------------------|--------|
| AATAAGGATAGGTTCTAATAGTACGGCCAC    | 8,111  |
| CTCGTTCGCGATCGCCTCCTCGGTAGGGTGTA  | 8,127  |
| ATGTGGTTAGGACGATGAGTGCAACTAATCCC  | 8,143  |
| GCGTTAAAACGACTTTACCGAAGCTGCTGGGT  | 8,159  |
| TTTTTGTGCGTCTAAACCTACAATAGCTTTAT  | 8,175  |
| GGTAGGTTCAAATCTGCCCGAGTCTTGATTTA  | 8,191  |
| AGAGTATAGCTTAGGGGTGCAGCTATCCGAAT  | 8,207  |
| TCAAAGCCCCCGCACAGAGCGTTAAGGAAT    | 8,223  |
| GATTGCCGATGTCATGCGCCACTCTATGAAC   | 8,239  |
| TGTACTACGATATTCATGCCATGAAATAACTT  | 8,255  |
| TTTTTTTTAAAGATACCAGCCATTTTTTTTT   | 8,271  |
| TTGGCTGATTTTTTTTTTTTTTACGCTTAG    | 10,15  |
| CATATATCCCCTGTCCATGAAAATAAAAAGC   | 10,31  |
| CCACATGAGACCAAGTGATAGCTGGGATATCG  | 10,47  |
| TACTAAAATTAGGATCACGGGGTACTCTAGC   | 10,63  |
| GTAAACGATGGGTGTTGGTGCAGAACTGCTCTA | 10,79  |
| TAGTTTGATCCGTGCATACTTGAATTACTTGG  | 10,95  |
| TCGC AACGGCTGATTCATAGGTATTCATAAC  | 10,111 |
| GCGGCCATGCGAAAATCACTCGCACTTAGATC  | 10,127 |
| CGGCATGCTAAGCCACAGATTGTAGCTGTGAC  | 10,143 |
| TTCCGCGTGGTGCTACACTTACGTGTAGTGTC  | 10,159 |
| TGATTAGCCCATACGGTCCAACATGATAATC   | 10,175 |
| CCGCACGTCTGCCAGGCAAGTCCGATGTTGGG  | 10,191 |
| GGAACCTGAGGAGAAGCTAACGATGTGGGAGG  | 10,207 |
| GCCACTACCCGCCGCATTTCAACTTCTTGCCA  | 10,223 |
| TGCTGGTGGATGGCCGATCAGTTAATATTAAG  | 10,239 |
| TCTGGTTCCGACATCCTATCCTTTGGTCCGGG  | 10,255 |
| TTTTTTTTAAATGGTCTCTCCCTTTTTTTTT   | 10,271 |
| ACCCGAGATTTTTTTTTTTTTTGCCTGCTG    | 12,15  |
| TACGTATCCCGCTCGATCCTTCCAACATCTC   | 12,31  |
| GCCTGTGAGTCCGGTCCGAGATGTTCTCATAA  | 12,47  |
| CCAGTCCCCGTAGTTCCTTTACGCGCTTGAAC  | 12,63  |
| GAGGTGGTCATCTGATCAGAACTATGTACCG   | 12,79  |
| TACATACGTGACATCGCATCTTTGGGGTTCGT  | 12,95  |
| CCCATGGATCGCGTTCGACTCTCGTATCTAGT  | 12,111 |
| GCGCCAGATGGTGAATCTCGACGGTTAATTTG  | 12,127 |
| ACCAGTTCGTCCTCACCGAATCGCAGGAGATC  | 12,143 |
| AGCAGGTCCGGTATCTCTTTAGGCCAAGGAG   | 12,159 |
| CACGACGATGTCGAAATATTTGACGTCTTGCG  | 12,175 |
| CGTCACTTCAGCATTACACGCGAGCTATGTAG  | 12,191 |
| GCTCTAAAGCTGAGGACTAGGACCTAACCCCTT | 12,207 |
| GCCTTGTCACGGCCGGCCAGTGAGCTCGACA   | 12,223 |
| GATTGGGTCTGAAGCGTCGTACAGTTGGACGG  | 12,239 |
| AGACACTAGCTCGTATCTTCTCGIATATCA    | 12,255 |
| TTTTTTTTGACTTGATTGTGGGCTTTTTTTTT  | 12,271 |
| AACGGCGATTTTTTTTTTTTTTTTACCCACA   | 14,15  |
| GCTTCTCGCGGAGCATAACCTGGATAGGACA   | 14,31  |
| ACGACTTATCTATACACATGTAATCTAGCAG   | 14,47  |
| GAGGAGCGGGGCATAAGTTCGTATATGCTCT   | 14,63  |
| CGGGGAGGTAATCCCGTGTCAAGGGAAGTTC   | 14,79  |
| TCACAGTGTGTAATGGATACTTTGAAAAGGC   | 14,95  |
| AATTCATCGTGAAAATTCATACGACAAGAACT  | 14,111 |
| GGAGAATCCCGAACGAATGAACACCCCGCTGC  | 14,127 |
| AAAGCTTCGCTGCCATGGAATGCAACACCGGC  | 14,143 |
| AGCCGAACGGCTAGAAGGGCTGATCCCGCAAC  | 14,159 |
| AGTTACTGCACAAGGGGGAGGCGGGGGTATAG  | 14,175 |
| TATAAAGCGTTAATGCTAGCCCGCTCCCGGT   | 14,191 |
| TGCTTATCCGGGAATCCCGGTAATACACAA    | 14,207 |
| CTGGTTTTGGTCTTACACTGACACCCTTTT    | 14,223 |
| ATTAATACGATTGCGCGCTCGACCCGCGCTTC  | 14,239 |
| GCCAGTAGGGCGGGCCAGAGCCGAGGTCAGG   | 14,255 |
| TTTTTTTTATGAAAACGAGGTAGCTTTTTTTTT | 14,271 |



#### S4.9 XY-32H×64B-pore crystal sequences

|                                                   |       |
|---------------------------------------------------|-------|
| CCAGGTTAAGTGGCTCAATCATACTCACGGTT                  | 1,31  |
| AACTGTTGTGTCTATGTTTACTTAGGGATGG                   | 1,47  |
| TACGAACTCAACGCACGCTCGGGTAGTCTCAA                  | 1,63  |
| GAAGATAGAGAGCATAAATTCGCTAAAACCGGA                 | 1,79  |
| AAAGTATCCGCATCTCACTCAGTGATCGAGTA                  | 3,31  |
| TTCATGTCGCCTTTTCGAACGGTGACACACTT                  | 3,47  |
| GTGTTCAATCAGAGTAGCGGAAATATGGCCGC                  | 3,63  |
| TTCGGTGCAGCGGGCCGCTGTAACGCTTA                     | 3,79  |
| ATCAGCCCGGGCTTTTGCTAATACGCTGAGCG                  | 5,31  |
| ATGCTGTTGTTGCGGGGTTTCTGAACCGGAAC                  | 5,47  |
| CCGGGCTAATGAAGCCGTGACCCAGAGACTG                   | 5,63  |
| TCTGATGCACCGGGAGCCAGCCACTTAGCTGT                  | 5,79  |
| GTCAGTGTGATCGGAGTTCCTCTAGCTAGG                    | 7,31  |
| GTGATGCCAAAAGGGTGGATATGGAGCTGGAA                  | 7,47  |
| CGGCTCTGATTTCTAGTGACCTGGTATAATGG                  | 7,63  |
| CGGAGCTACCTGACCTCAATCATACTGCCAC                   | 7,79  |
| GGAAGGATTCATCCCTTTAAGATGATCGCA                    | 9,31  |
| CAGTCTTTGAGATGTTGAACATCTTTTGGTTG                  | 9,47  |
| GCGTAAAGATCTCGCATTCTGGTGCCAAAAC                   | 9,63  |
| GCCGACTCGTTCAAGCACTATATCTGGCTAT                   | 9,79  |
| AAAAGATGTCTGTCAGCCAAGCTTAGCATAA                   | 11,31 |
| GCGGCTGGACGACCCCGCGTGCAGGACTGA                    | 11,47 |
| CCGTCGAGCCCTGCGCGACAAACGCATATCCT                  | 11,63 |
| CGGCCCGCCAAATTAATAGTCGATTACGCTC                   | 11,79 |
| GCCTAAAAGTCTTCCACGGTAATCGGGGGTGACTCCGGCCTCCTGG    | 13,47 |
| TATATTAGCTTACCCACTCGCGTGGCAGTCTACGACTCGTTCGAACGA  | 13,79 |
| GGACTGTTCTACATAGTGACTTGGACGAGGTTCACTGGGCGCTATAC   | 17,31 |
| AGGAAACTCGAGGGGCTCCCTGTCTGTGAGC                   | 17,47 |
| CCAGCGACCACTTCTGGAGAAAGATGCGGTGGCAGTAGTTGTGATTAG  | 17,63 |
| CTTGGGGGTGATATACCTCACTAAACTCCTTC                  | 17,79 |
| TAATGTGACTAAGCGT                                  | 19,31 |
| TAACTCCAAAGGAAACCAGCTATCCCATATTCGATGTAAGCGGACATC  | 19,63 |
| TATGCGCCCGATATCCGTTCAAACCTAGGGGGC                 | 19,79 |
| TTCTGACCAAAGCTCA                                  | 22,16 |
| TGAGAATTGTAAACAGGAACAGCTTAGAGCAG                  | 23,31 |
| TCAAAGTTCGGATACGCTACCTATGGACGGGGATATGCGACACCATGAT | 23,47 |
| CCGGATGAGTTATGAAAGATCGTCAATGGGATA                 | 23,63 |
| TACAATCTCGAAGTAAAGCATAGCACCTGCG                   | 23,79 |
| AAGATAGGGTACAGCAGTAATACCTCTACCT                   | 25,31 |
| TGTTGGACGTAAGCGTGAATAACGACCAGAA                   | 25,47 |
| AGCACGAGGATTATCACGTGTACCTCGAAATA                  | 25,63 |
| ATCGTTAGTTTCTCGACTGTTCCGAAACAGGC                  | 25,79 |
| AGCGGTAGCCTCCCACTTAACCTATGCCTGG                   | 27,31 |
| TAAGTATTTCTCCTGGTTCCGCTAGCTGAT                    | 27,47 |
| CTATGGTCCCTAATATAACCCTCGGAGGCAAG                  | 27,63 |
| GGGAGAGGGTGAAAACAGCCACCTGGCTCGGG                  | 27,79 |
| GAGTGCCCCCTCGGCAGCCGCTCGGTTATAC                   | 29,31 |
| TCGTCAAAGCCTGCTTCCATAGCTAACCCGAT                  | 29,47 |
| TGTGCATTCCACGTGAGTCGTAATAAGCAA                    | 29,63 |
| ACGTGGGAGTGCCCGAGCGTCTGAGGTATGGT                  | 29,79 |
| TTACCCACTATGTTGTCTCAAAGTCTAACAGT                  | 31,31 |
| ACTAATTATCCATAACTGTGCACGTCAGGGAT                  | 31,47 |
| TCTCACCGGTGGCCGTTGCTACATCAGTTTCT                  | 31,63 |
| TTGCACTCCTGGGGAACTATACTTACGCACT                   | 31,79 |
| GGTTTGGAGGGATTAGGCAATTGCTAGGTTGC                  | 33,31 |
| ATTGTAGGCACAATTTTTGATTGATCACATA                   | 33,47 |
| CATGGCAATAAAGCTGTAGCCTGAGGCGCGC                   | 33,63 |
| AGCTGCACCGTGTACCTTGATATTGAGGGAC                   | 33,79 |
| ACCTCGTCATTTCGATAAACCATACTGAGGGC                  | 35,31 |
| AGTGGGCGAGATCGGCTAATCATTAGTGCTCC                  | 35,47 |
| CTTAGTTAGTTCATAGTTCATTAGGGGCGGAA                  | 35,63 |
| ATGGGCTGGTGCCCACTACAGTAACCAACC                    | 35,79 |
| GTATGATTTTTTTTTTTTTTTTTTATCCGAAT                  | 0,23  |
| TCAGAAACAACCGTGACATCTTTTGGGGTTCGT                 | 0,39  |
| ACCCGAGCGTTCGGTTCGCCACTCTATGAAC                   | 0,55  |
| GTGGCTGGTTGAGACTCTCGACGGTAAATTTG                  | 0,71  |

|                                                   |       |
|---------------------------------------------------|-------|
| TTTTTTTACAGCTAACAGCCATTTTTTTTT                    | 0,87  |
| CACTGAGTTTTTTTTTTTTTTTTTCTAATCCC                  | 2,23  |
| AAGTAAACTACTCGATATCCTTCCAACATCTCAAAGACTGTGCGAGAT  | 2,39  |
| ATTTCCGCCCATCCCTCCTACAATAGCTTTAT                  | 2,55  |
| AGCGAATTGCGGCCATCTTTACGCGCTTGAACGAGTCGGCTTTTTTTTT | 2,71  |
| TTTTTTTTTCCGGTTTGTGCAGCTTTTTTTTT                  | 2,87  |
| GTATTAGCTTTTTTTTTTTTTTTTTTACAACATA                | 4,23  |
| CACCGTTCCGCTCAGCACACTGACACCCTTTT                  | 4,39  |
| GGGGTCACAAGTGTGTTAATTAGTACGGCCAC                  | 4,55  |
| ACAGGCGGCAGTCTCTCAGAGCCGAGGTCAGG                  | 4,71  |
| TTTTTTTTTAAAGCGTTGAGTGCAATTTTTTTT                 | 4,87  |
| AGCTTGGGTTTTTTTTTTTTTTTTTAAAAGCCC                 | 6,23  |
| CCATATCCTTATGCTAAAACAGTCCGCCCTCG                  | 6,39  |
| CGTTTGTCTTCCAGCTAACAGCATGGCTTCAT                  | 6,55  |
| TATGATTGAGGATATGGTCGCTGGGTATATCA                  | 6,71  |
| TTTTTTTTGTGGGACGGCATCAGATTTTTTTTT                 | 6,87  |
| AGATGTTCCCTAGCTAGAGGGAACTTTTTTTTTTTTTTTGGAGATGCG  | 8,39  |
| ATAATAGTCCATTATACCAGGTCACAACCAAAGACATGAATACTCTGA  | 8,71  |
| TTTTTTTTTATAGCCAGGCACCGAATTTTTTTTT                | 8,87  |
| TTTTTTTTTGGGGATGA                                 | 9,8   |
| TTCTTAAATTTTTTTTTTTTTTTGAGCCACT                   | 10,23 |
| CGCACGGCTGCGATCAATTACCGTGGAAGGAC                  | 10,39 |
| CACCAGAATCAGTCGTCAACAGTTGTGCGTTG                  | 10,55 |
| ATCGACTAAGTTTTGGCACGCGAGTGGGTAAG                  | 10,71 |
| TTTTTTTTGAAGCGTACTATCTCTTTTTTTTT                  | 10,87 |
| GCCGGAGTTTTTTTTTTTTTTTTTCTGACAGA                  | 12,23 |
| GACAGGGACCAAGGAGAATTCAGCGTATCC                    | 12,39 |
| CGAGTCGTGCTCGACACCAGCCGCGCAGGG                    | 12,55 |
| TTAGTGAGTCGTTTCGATCATCCGGTTACTTCG                 | 12,71 |
| TTTTTTTTGAAGGAGTGCGGGGCCGTTTTTTTT                 | 12,87 |
| CCAAGTCATTTTTTTTTTTTTTTTTTCGCGATC                 | 16,23 |
| CCCAGTGAAACCTCGTTCACATTAGAATATGG                  | 16,39 |
| TCTTCTCGTATAGCGGGCATCACCTAGAAAT                   | 16,55 |
| AACTACTGCCACCGCATGGAGTTAGGATATCG                  | 16,71 |
| TTTTTTTTCTAATCACTAGCTCCGTTTTTTTT                  | 16,87 |
| AGCTGTTCTTTTTTTTTTTTTTTTCTATGTAG                  | 18,23 |
| CTTACATCCTGCTCTAGGGCACTCAAAGCAGG                  | 18,39 |
| TGACGATCGATGCCGAGTTTCTCAGAAGTG                    | 18,55 |
| GTTTGAACATATCCCAAATGCACATCGGGCAC                  | 18,71 |
| TTTTTTTTGCCCCCTACCCCAAGTTTTTTTT                   | 18,87 |
| GGTCAGAAATTTTTTTTTTTTTTTTACCCCG                   | 22,23 |
| CATAGGTATGAGCTTTCCTATCTTACGTTAC                   | 22,39 |
| GTCGCATATCCCGTCCCTTAGGCAGACGTGC                   | 22,55 |
| GCTATGCTATCATGGTCTCGTGCTCGAGAAA                   | 22,71 |
| TTTTTTTTCGCAGGGTCTAATATATTTTTTT                   | 22,87 |
| GTATFACTTTTTTTTTTTTTTTTCTGTTIAC                   | 24,23 |
| AGCTATGGAGGTAGAGGACGAGGTGCCGATCT                  | 24,39 |
| GGTACACGATCGGGTTGAACTTGATTCATAAC                  | 24,55 |
| TCAGACGCTATTTGATAACTAAGTGGGGCAC                   | 24,71 |
| TTTTTTTTACCATAACCAGATTGTATTTTTTT                  | 24,87 |
| TAGGTAAATTTTTTTTT                                 | 26,23 |
| CGAGGGTTTTCTGGTCTTATTTCCCAAGGCATCCAAACCAAATTGTG   | 26,55 |
| TTTTTTTTGCCTGTTTCGGAACAGCTTGCCCTGCCCATGGTGACACG   | 26,87 |
| GAGGCGGCTTTTTTTTTTTTTTTTACGCTTAG                  | 28,23 |
| GCGGAACCGTATAACCGTGGGTAAGTTATGGA                  | 28,39 |
| AGTACGACATCAGCTAGATAGCTGGTTTCCTT                  | 28,55 |
| AGGTGGCCTTGCTTTACGGTGAGATTCCCCAG                  | 28,71 |
| TTTTTTTTCCCGAGCCGGCGCATATTTTTTT                   | 28,87 |
| TATGGTTTTTTTTTTTTTTTTTTTGGCCGAGG                  | 30,23 |
| CGTGACAGCCCTCAGGGGCTGATCCCGCAAC                   | 30,39 |
| CTAATGAAATCCCTGACTTGACGATCACGTGG                  | 30,55 |
| AGTATAGTTTCCGCCCTAGCCCGCTCCCGGT                   | 30,71 |
| TTTTTTTTAGTGCATATCCACGTTTTTTTTT                   | 30,87 |
| CACTTGAGTTTTTTTTTTTTTTTTTGTGGGAGGCTACCGCTAGGAGAAA | 32,23 |
| CGAATCAAACCTGTTAGGATACTTTGAAAAGGC                 | 32,39 |
| ATGTAGCATATGTGATATCAGTTAATATTAAGGACCATAAGTGTTCAC  | 32,55 |
| ATATCAAGAGAACTGATGAACACCCCGCTGC                   | 32,71 |
| TTTTTTTTGTCCCTCACCTCTCCCTTTTTTTTT                 | 32,87 |

GCAATTGCTTTTTTTTTTTTTTTGCTGTGAC  
AATGATTAGCAACCTATAACCTGGATAGGACA  
CAGGCTACGGAGCACTGTCCAACATGATAATC  
ACTGTACGGCGCGCCTAGTTCGTATATGCTCT  
TTTTTTTTGGTTGGTTCTAACGATTTTTTTTT

34,23  
34,39  
34,55  
34,71  
34,87

S4.10XY-32H×128B-pore crystal sequences

|                                                    |        |
|----------------------------------------------------|--------|
| CCAGGTAAAGTGGCTCAATCATACTCACGGTT                   | 1,23   |
| AACTGTTGTGTCCATGTTTACTTAGGGATGG                    | 1,39   |
| TACGAACTCAACGCACGCTCGGGTAGTCTCAA                   | 1,55   |
| GAAGATAGAGAGCATAAAATTCGCTAAAACGGGA                 | 1,71   |
| AAAGTATCCGCATCTCACTCAGTGATCGAGTA                   | 1,87   |
| TTCATGTCGCCTTTTCGAACGGTGACACACTT                   | 1,103  |
| GTGTTCAATCAGAGTAGCGGAAATATGGCCGC                   | 1,119  |
| TTCGGTGCAGCGGGCCGCTGTAACGCTTA                      | 1,135  |
| ATCAGCCCGGGCTTTTGCTAATACGCTGAGCG                   | 3,23   |
| ATGCTGTTGTTGCGGGGTTTCTGAACCGGAAC                   | 3,39   |
| CCGGGCTAATGAAGCCGTGACCCAGAGACTG                    | 3,55   |
| TCTGATGCACCGGGAGCCAGCCACTTAGCTGT                   | 3,71   |
| GTCAGTGTGATCGCGAGTTCCTCTAGCTAGG                    | 3,87   |
| GTGATGCCAAAAGGGTGGATATGGAGCTGGAA                   | 3,103  |
| CGGCTCTGATTTCTAGTGACCTGGTATAATGG                   | 3,119  |
| CGGAGCTACCTGACCTCAATCATACTGCCAC                    | 3,135  |
| GGAAGGATTCATCCCTTTAAGAATGATCGCA                    | 5,23   |
| CAGTCTTTGAGATGTTGAACATCTTTTGGTTG                   | 5,39   |
| GCGTAAAGATCTCGCATTCTGGTGCCAAAAC                    | 5,55   |
| GCCGACTCGTTCAAGCACTATATCTGGCTAT                    | 5,71   |
| AAAAGATGTCTGTCAGCCCAAGCTTAGCATAA                   | 5,87   |
| GCGGCTGGACGACCCCGCGTGCAGCACTGA                     | 5,103  |
| CCGTCGAGCCCTGCGCGACAAAACGCATATCCT                  | 5,119  |
| CGGCCCGCCAAATTAATAGTCGATTACGCTTC                   | 5,135  |
| GCCTAAAAGTCTTCCACGGTAATCGGGGGTG                    | 7,23   |
| ACTCCGGCTCCTTGGTATATTAGCTTACCCA                    | 7,39   |
| CTCGCGTGGCACGCTACGACTCGTCGAACGA                    | 7,55   |
| GGACTGTTCTACATAGTGACTTGACGAGGTT                    | 7,71   |
| TCACTGGGCGCTATACAGGAAACTCGAGGGGC                   | 7,87   |
| TCCCTGTCTGTCGAGCCAGCGACCACTTCTG                    | 7,103  |
| GAGAAAGATGCGGTGGCAGTAGTTGTGATTAG                   | 7,119  |
| CTTGGGGGTGATATACCTCACTAAACTCCTTC                   | 7,135  |
| TAATGTGACTAAGCGTTAACTCCAAAGGAAAC                   | 9,23   |
| CAGCTATCCCATATTTCGATGTAAGCGGACATC                  | 9,39   |
| TATGCGCCCGATATCCGTTCAAACCTAGGGGGC                  | 9,55   |
| TTCTGACCAAAGCTCATGAGAATTGTAAACAG                   | 9,71   |
| GAACAGCTTAGAGCAGTCAAGTTCGGATACGC                   | 9,87   |
| TACCTATGGACGGGATATGCGACACCATGAT                    | 9,103  |
| CCGGATGAGTTATGAAGATCGTCATTGGGATA                   | 9,119  |
| TACAATCTCGAAGTAAAGCATAGCACCTGCG                    | 9,135  |
| AAGATAGGGTCACAGCAGTAATACCTCTACCT                   | 11,23  |
| TGTTGGACGTAAGCGTGAAATAACGACCAGAA                   | 11,39  |
| AGCACGAGGATTATCACGTGTACCTCGAAATA                   | 11,55  |
| ATCGTTAGTTTCTCGACTGTTCCGAAACAGGC                   | 11,71  |
| AGCGGTAGCCTCCCACTTAACCTATGCCTTGG                   | 11,87  |
| TAACGTATTTCTCCTGGTTCCGCTAGCTGAT                    | 11,103 |
| CTATGGTCTTAATATAACCCTCGGAGGCAAG                    | 11,119 |
| GGGAGAGGGTGAAACAGGCCACCTGGCTCGGG                   | 11,135 |
| GAGTGCCCCCTCGGCAGCCGCTCGGTTATACTCGTCAAGCCCTGCTTT   | 13,39  |
| CCATAGCTAACCCGATTGTGATTCCACGTGAGTCGTAATAAGCAA      | 13,71  |
| ACGTGGGAGTGCCCGAGCGTCTGAGGTATGGTTTACCCACTATGTTGT   | 13,103 |
| CTCAAGTGCTAACAGTACTAATATCCATAACTGTGCACGTCAGGGAT    | 13,135 |
| TCTCACCGGTGGCCGTGCTACATCAGTTTCTTTGCACTCTCGGGAA     | 17,23  |
| ACTATACTTACGCACTGGTTTGGAGGGATTAG                   | 17,39  |
| GCAATTGCTAGGTTGCATTGTAGGCACAATTTTGTATTTCGATCACATA  | 17,55  |
| CATGGGCAATAAAGCTGTAGCCTGAGGCGCGC                   | 17,71  |
| AGCTGACCCGTGTCACCTTGATATTGAGGGACACCTCGTCATTCCGGAT  | 17,87  |
| AAACCTACTGAGGGCAGTGGGCGAGATCGGC                    | 17,103 |
| TAATCATTAGTGCTCCCTTAGTTAGTTTCATAGTTTCATTAGGGGCGGAA | 17,119 |
| ATGGGCTGGTGCCCCACGTACAGTAACCAACC                   | 17,135 |
| GGTGTAACCTGTGGGTA                                  | 19,23  |
| GGGCCGAGCGCTGGGCTTACATGTGCAAGTGAATATATGACTTGGTC    | 19,55  |
| GACCAGATCTGCTAGAAAACCAACATCCTCCTTGACACCTTTCAAT     | 19,87  |
| TTTAGTAAACACCCAACAGAGCTGAACTCCCATGGTCGTTCTACTG     | 19,119 |
| TCGTATGATCATAGGATCAAACCTAAATACAGC                  | 19,135 |
| GTACCGCACTTCTTG                                    | 22,8   |

|                                                   |        |
|---------------------------------------------------|--------|
| TCCTTATTGGCGATCGTGCATTCCAATGTTTG                  | 23,23  |
| ATGGCCCGGTGGCTTATTAAGACGGCCGGTGTAACACATAAAAGTCGT  | 23,39  |
| CCGCTCCGGTAGTCAACCGGAACGTAATGG                    | 23,55  |
| CAGAAAAGTCTATACCCGACAAAACAGATTTGTACCCGGGGTGAACAGC | 23,71  |
| ACGTGCGGCTTCTCCTGTATCGCCTTGTGTAT                  | 23,87  |
| TATACTCTTGCGGGGGGGTTCGAGCGCTCCACTGTAGTGGCCGGCCATC | 23,103 |
| GTGGACTAGAAAAGCGCCGGCAATCTGAATATC                 | 23,119 |
| GCTACCTCCGATACGCGAACCAGAACCATTTA                  | 23,135 |
| AGAGTAGGGCAGTGCTCAGCCAAAACAGTGGG                  | 25,23  |
| ACATCTCGGAAAGGTGTCCCAAGTGCAAGTAA                  | 25,39  |
| AAAAGGAATTATGAGATCATGTGGGATCCTAA                  | 25,55  |
| AGTTTCTGGTAGACCTCGTAGGCTAGAGCGGT                  | 25,71  |
| GATATCCACGGTACATTCGTTTACTGCACGGA                  | 25,87  |
| ACGAGAGTGCTGGCATAAGCAAGAGAAACCTA                  | 25,103 |
| ACTTGGGGACTAAGATCGTTGCGAATTTTCGC                  | 25,119 |
| GCGATTTCGATGTAGCCGAACGAGATCGTCCT                  | 25,135 |
| AGACGACGGATCTCCTGCATGCCGGTAGCACC                  | 27,23  |
| GTCAAATATGCGTGCTTTAACGCTTAGACC                    | 27,39  |
| CAGCTTGACGCAAGACGCTAATCACTGGGCAG                  | 27,55  |
| GGTCCTAGGTTGCAGAAACCTACCCCTAAGC                   | 27,71  |
| AGCGTAGTAAGGGTTACAAGTTCCTGCGGCGG                  | 27,87  |
| CTGTACGAATGAGTCCGGCCTTGACATGACAT                  | 27,103 |
| TCTCCACCCGTCCAAACACCAGCAGGATGTCG                  | 27,119 |
| AGCCACAACCTTGACAGTAGTACAGTATCTTT                  | 27,135 |
| TTTCATGGCGGCGATGTGCGCGTTTGCTCGCG                  | 29,23  |
| TGCGTACGGCTTTTATATAGCGTAGACCCGAC                  | 29,39  |
| AACCCCGTAAATCGTAAGAGTCGTTATGCCCC                  | 29,55  |
| CCGGTCTGCTAGAGTGGGACTGGATCAGATG                   | 29,71  |
| TTCAAGTATTCGGTGACCTCCCGCATTACAA                   | 29,87  |
| CGCGCTACCAAGTAAACGTATGTACGACGCGA                  | 29,103 |
| TGCGAGTGAACGGGTGGATGAATTTTCGTTTCGG                | 29,119 |
| GGCCAGGCGATCTAAGTCTGGCGCGTGAGGAC                  | 29,135 |
| ACGTAAGTTGAAGTAGGAAGCTTTTTCTAGCC                  | 31,23  |
| ATAGCATCGACACTACGACCTGCTTTTCGACA                  | 31,39  |
| CGGACTGCATTCTGGACAGTAACTGCATTAAC                  | 31,55  |
| TACGTGCTCCCAACATAAGTGACGTCTCAGC                   | 31,71  |
| AGTTGAAAATTATCTCGATAAGCAGAAGGACC                  | 31,87  |
| TGTATAACTGGCAAGAGACAAGGCCGCTTCAG                  | 31,103 |
| AAAGGATAGCCGGACCGTATTAATGCCGCGCC                  | 31,119 |
| AACGGTTTCCCGACCTAGTGTCTATCAAGTC                   | 31,135 |
| TATTCTATGAAACCAATCTCGGGTCGAGCGGG                  | 33,23  |
| TCACTGTTGTGACCTACGAGAAGCGTATAGAT                  | 33,39  |
| GTTCCGCGCAATAGCTCACAGGCGAACTACG                   | 33,55  |
| TATGAATTGGTTTAAACGCTCCTCGGGAATTA                  | 33,71  |
| ATACGACAGGTGGCAAACCACCTCCGATGTCA                  | 33,87  |
| GCGCCGATACCCATCACTGTGAATTTCCAC                    | 33,103 |
| ACCGAGGATTCGACGGTCCATGGGATTCACCA                  | 33,119 |
| AGCTCGTATACACCTGATTCTCCATGGCAGC                   | 33,135 |
| GCTTCGGTACAGGTCTGAACTGGTAGATCACC                  | 35,23  |
| ATTAGTGTACCCAGCAGTTCGGCTCCCTTGTG                  | 35,39  |
| GACTCGGGATACCCGGTCTCGTGTAAATGCTG                  | 35,55  |
| TTCCGGGGTAAATCAAGCTTTATAAATCCCG                   | 35,71  |
| ACGCTCTGTTCCAACTTTAGAGCCCGGCCGT                   | 35,87  |
| AATCTCGGATTCCTTAAAAACAGGCGCAATC                   | 35,103 |
| TCATGGCATAAACGAAACCAATCATACGAGC                   | 35,119 |
| GTGGAGGGAAGTTATTCTACTGGCGTTTTTCAT                 | 35,135 |
| GTATGATTTTTTTTTTTTTTTTTTTAGACCTGT                 | 0,15   |
| AGATGTTCAACCGTGACCTATCTTACGCTTAC                  | 0,31   |
| ACCCGAGCCAACAAAACACTAATCCGGGTAT                   | 0,47   |
| ATAATAGTTTGAGACTCTCGTGCTTCGAGAAA                  | 0,63   |
| CACTGAGTATAGCCAGCCCCGGAAGTTTGAAA                  | 0,79   |
| CGCACGGCTACTCGATCTACCGTAGGAGAAA                   | 0,95   |
| ATTTCCGCTCAGTCTCCGAGATTTTCGTTTA                   | 0,111  |
| ATCGACTAGCGGCCATGACCATAGTGTTCAC                   | 0,127  |
| TTTTTTTTGAAGCGTACCCTCCACTTTTTTTTT                 | 0,143  |
| GTATTAGCTTTTTTTTTTTTTTTTATGGTTTC                  | 2,15   |
| AAGTAAACCGCTCAGCTCACATTAGAATATGGGATAGCTGGGATATCG  | 2,31   |
| GGGGTACCCCATCCCTAACAGTGAGCTATTTCG                 | 2,47   |

|                                                  |        |
|--------------------------------------------------|--------|
| AGCGAATTCAGTCTCTGGCGCATATGAGCTTGGTCAGAACTGCTCTA  | 2,63   |
| GAGGGAACTCCGGTTTAAATTCATATTGCCACC                | 2,79   |
| CACCGTCCCTAGCTAAGCTGTTCTCCCCGTCCATAGGTATTCATAAC  | 2,95   |
| CCAGGTCAAAGTGTGTTGCGGGCCCTGCGAA                  | 2,111  |
| ACAGGCGGCCATTATATCATCCGGTTACTTCGAGATTGTATTTTTTTT | 2,127  |
| TTTTTTTTTAAGCGTTTACGAGCTTTTTTTTTT                | 2,143  |
| TTCTTAAATTTTTTTTTTTTTTTTCTACTTCA                 | 4,15   |
| TCAGAAACTGCGATCACTTTAGGCCCAAGGAG                 | 4,31   |
| CACCAGAAGTTCGGTGATGCTATTCCAGAAT                  | 4,47   |
| GTGGCTGGAGTTTTGGCACGCGAGCTATGTAG                 | 4,63   |
| AGCTTGGGACAGCTAAAGCACGTAGAGATAAT                 | 4,79   |
| CCATATCCTTATGCTACCCAGTGAGCTCGACA                 | 4,95   |
| CGTTTGTCTTCCAGCTGTTATACAGGTCCGGC                 | 4,111  |
| TATGATTGAGGATATGTCTTTCTCGTATATCA                 | 4,127  |
| TTTTTTTTGTGGGACGAAACCGTTTTTTTTTT                 | 4,143  |
| GTATTACTTTTTTTTTTTTTTTTGGGGATGA                  | 6,15   |
| CTAATATAAGGTAGAGCGGTGAGAAGTGCCTA                 | 6,31   |
| GGTACACGTGGGTAAGAAAGACTGTGCGAGAT                 | 6,47   |
| CCAAGTCATATTTGAGCAATTGCAGCTTTAT                  | 6,63   |
| TAGGTTAAAACCTCGTGAGTCGGCTGACAGA                  | 6,79   |
| GTCGTGGCCAAGGCAGTGACAGCTGCCCTCAG                 | 6,95   |
| CGAGGGTTCAGAAGTGCCAGCCGCGCGCAGGG                 | 6,111  |
| TTAGTGAGCTTGCCTCAATGATTATGGGGCAC                 | 6,127  |
| TTTTTTTTGAAGGAGTGCGGGCCGTTTTTTTTT                | 6,143  |
| CTTACATCCACCCCGATTACCGTTTTTTTTTTTTTTTAAAAGCCC    | 8,31   |
| AATTCATCGTTCGACGAGTCGTGATGCCGAACAGCATGGCTTCAT    | 8,63   |
| GTCGCATAGCCCCTCGAGTTTCTCTGTTACGCATCAGATCGCGATC   | 8,95   |
| GCTATGCTCTAATCACAATACTGATCATGGTGGCATCACCTAGAAAT  | 8,127  |
| TTTTTTTTCGCAGGGTTAGCTCCGTTTTTTTTT                | 8,143  |
| TTTTTTTTACGCTTAG                                 | 9,0    |
| TGGAGTTATTTTTTTTTTTTTTTGAGCCACT                  | 10,15  |
| GTTATTTTCGTTTCCCTGAGGCGGCTGCCGAGG                | 10,31  |
| GTTTGAACCTTCTGGTCCAACAGTTGTGCGTTG                | 10,47  |
| CGGAACAGGCCCCCTAAATGCACAATCGGGTT                 | 10,63  |
| GAACCTGAGCCTGTTCTATCTTCGAGATGCG                  | 10,79  |
| GCGGAACCGGTATCCTCAGACGCTCGGGCAC                  | 10,95  |
| TGACGATCATCAGCTAGACATGAATACTCTGA                 | 10,111 |
| AGGTGGCCTATCCAATAATAGTACTGTTAG                   | 10,127 |
| TTTTTTTTCCCGAGCCGCACGAAITTTTTTTT                 | 10,143 |
| CTTGACGATTTTTTTTTTTTTTTGCTGTGAC                  | 12,15  |
| TCCAAACCAAAGCAGGAATAAGGATAAGCCAC                 | 12,31  |
| AGTACGACCTAATCCCGTCCAACATGATAATC                 | 12,47  |
| CAGGCTACTTGCTTTAGGAGGCGGGGTATAG                  | 12,63  |
| GTGGGTAAAGCGCGCTCTAACGATGTGGGAGG                 | 12,79  |
| CGCCCACTACAACATACCGCACGTCCCCGCA                  | 12,95  |
| CGTGACACAGCCGATCTATCAGTTAATATTAAG                | 12,111 |
| ACTGTACGATCCCTGATAGTCCACGCGTATCG                 | 12,127 |
| TTTTTTTTGGTTGGTTCCTCTCCCTTTTTTTT                 | 12,143 |
| ATGTAGCATTTTTTTTTTTTTTTTGGAAAGGAC                | 16,15  |
| GAGTGCAAAGAACTGGGTACACCTCACTTGC                  | 16,31  |
| CCTACAATTTCCCGAGCCGGAGTAGACGTGC                  | 16,47  |
| CGAATCAAAAATTGTGCTCGGCCCGAGGATGT                 | 16,63  |
| ATATCAAGTATGTGATAACAGTCCGTATAGCG                 | 16,79  |
| GACGAGGTGTCCCTCAATCTGGTCGGAAGTTC                 | 16,95  |
| TAACTAAGATCCGAATGACAGGGACCACCGCA                 | 16,111 |
| CTAATGAACTATGAACTACTAAAATCCTATGA                 | 16,127 |
| TTTTTTTTTCCGCCCCCCCAAGTTTTTTTTT                  | 16,143 |
| GGAATGCAITTTTTTTTTTTTTTACGGCCAC                  | 18,15  |
| CATATATTCAAACATTCATGAAAATAAAAAGC                 | 18,31  |
| TTCCGCGTGACCAAGTAGTATAGTGCAACCTA                 | 18,47  |
| GTGTCAAGCCATTACGACGGGGTACTCTAGC                  | 18,63  |
| GGCGATACATTGAAAGTGCCATGGTGACACG                  | 18,79  |
| CGACCATGATACAAATCTGAAATTAATTGG                   | 18,95  |
| GATTGCCGAGTAGAATATGGTTTGGAGCACT                  | 18,111 |
| TAGTTTGAGATATTCACACTCGCACTTAGATC                 | 18,127 |
| TTTTTTTTGCTGTATTCAGCCATTTTTTTTTT                 | 18,143 |
| GGCGGTACTTTTTTTTTTTTTTTGTATAACC                  | 22,15  |
| CGTCTTAAACAAGAACTCTACTCTACCTTTC                  | 22,31  |

|                                                   |        |
|---------------------------------------------------|--------|
| ATGTGGTTACACCGCGGGCACTCTCACGTGG                   | 22,47  |
| TTTTGTGACGACTTTTTCTTTTAGGTCTAC                    | 22,63  |
| CCCCGGTACAAATCTGAGCTATGGACCATACC                  | 22,79  |
| GCTCGACCGCTGTTTCATGGATATCATGCCAGC                 | 22,95  |
| GCCACTACAGTGGAGCTCCCACGTGTATGGA                   | 22,111 |
| TCTGGTTCGATGGCCGCCCAAGTCTACATG                    | 22,127 |
| TTTTTTTTTAAATGGTCACTTGAGTTTTTTTT                  | 22,143 |
| TTGGCTGATTTTTTTTTTTTTTTTCGATCGCC                  | 24,15  |
| TACGCTATCCCACTGTACCGAAGCTGCTGGGT                  | 24,31  |
| CCACATGAGTCCGGTCGCGGCCATTGACTACC                  | 24,47  |
| CCAGTCCCTTAGGATCCCCGAGCTTTGATTA                   | 24,63  |
| GTAACGACATCTGATACTTCTGAGGAGAAG                    | 24,79  |
| TACATACGTCCGTGCACAGAGCGTTAAGGAAT                  | 24,95  |
| TCGCAACGTGCGTTCGAGAGTATAGCGCTTTC                  | 24,111 |
| GCGCCAGAGCGAAAATTGCCATGAAATAACTT                  | 24,127 |
| TTTTTTTTGTCTCACGAGGTAGCTTTTTTTTT                  | 24,143 |
| CGGCATGCTTTTTTTTT                                 | 26,15  |
| TGATTAGCTTACTTGCACTTGGGAGGTGCTACATAGAATATAGGTCAC  | 26,47  |
| GGAACCTGACCGCTCTAGCCTACGCTGCCAGCGCGAACTTTAAACC    | 26,79  |
| TGCTGGTGTAGGTTTCTCTTGGCTCCGCGCATGTCGTATAATGGGTA   | 26,111 |
| TTTTTTTTTAGGACGATCTCGTTCGCGACATCTCTCCGGTAGGGTGTA  | 26,143 |
| AACGGCGATTTTTTTTTTTTTTTTTTACCACA                  | 28,15  |
| GCGTTAAACGCGAGCAACTTACGTGTAGTGTC                  | 28,31  |
| ACGACTCTGGTCTAAAAATGTAAGCCAGCG                    | 28,47  |
| GGTAGGTTGGGGCATAAGCAGTCCGATGTTGGG                 | 28,63  |
| CGGGGAGGGCTTAGGGTGGTGGTTCTAGCAG                   | 28,79  |
| TCAAGGCCTTGTAATGTTTCAACTTCTTGCCA                  | 28,95  |
| AATTCATCATGTCATGAGCTCTGTTGGGTGTT                  | 28,111 |
| TGTACTACCCGAACGATATCTTTGGTCCGGG                   | 28,127 |
| TTTTTTTTAAAGATACTCAIACGATTTTTTTTT                 | 28,143 |
| ACCAGTCTTTTTTTTTTTTTTTTCATCGCCG                   | 30,15  |
| AGCAGGTCGGTGATCTATCCTTCCAACATCTC                  | 30,31  |
| CACGACGATGTCGAAACGTACGCATACGATTT                  | 30,47  |
| CGTCACTTCAGCATACTTTACGCGCTTGAAC                   | 30,63  |
| GCTCTAAAGCTGAGGAAGAACCGGTACCAGAA                  | 30,79  |
| GCCTTGTACGGCCGGCATCTTTGGGGTCGT                    | 30,95  |
| GATTGGGTCTGAAGCGTAAGCGCGACCCGTT                   | 30,111 |
| AGACACTAGCTCGTATCTCGACGGTTAATTG                   | 30,127 |
| TTTTTTTTGACTTGATGCTGGCCTTTTTTTTT                  | 30,143 |
| AAAGCTCTTTTTTTTTTTTTTTTAGGAGATCCGTCGTCTAGCACGCA   | 32,15  |
| GCTTCTCGGGCTAGAAGGGCTGATCCCGCAAC                  | 32,31  |
| AGTTACTGATCTATACTAATTTGACGCTTGGCGTCAAGCTGTCTGCAAC | 32,47  |
| GAGGAGCGGTTAATGCTAGCCCGGCTCCCGGT                  | 32,63  |
| TGCTTATCTAATCCCTAGGACCTAACCTTACTACGCTGGACTCAT     | 32,79  |
| TCACAGTGGGTCTTACACTGACACCCTTTT                    | 32,95  |
| ATTAATACGTGGAAATTCGTACAGTTGGACGGGTGGGAGATGTCAAGT  | 32,111 |
| GGAGAATCGGCGGGCCAGAGCCGAGGTCAGG                   | 32,127 |
| TTTTTTTTGCTGCCATTGTGGGCTTTTTTTTT                  | 32,143 |
| ACCCGAGATTTTTTTTTTTTTTTTGCCTGACC                  | 34,15  |
| AGCCGAACCCCGCTCGTAACCTGGATAGGACA                  | 34,31  |
| GCCTGTGACACAAGGGCGAGATGTTTCATAA                   | 34,47  |
| TATAAAGCCGTAGTTCAGTTCGTATATGCTCT                  | 34,63  |
| GAGGTGGTTCGGGAATTCAGAAACTATGTACCG                 | 34,79  |
| CTGGTTTTTGACATCGGATACTTTGAAAAGGC                  | 34,95  |
| CCCATGGAGATTGCGCACTCTCGTATCTTAGT                  | 34,111 |
| GCCAGTAGTGGTGAATATGAACACCCCGCTGC                  | 34,127 |
| TTTTTTTTATGAAAACCGAATCGCTTTTTTTTT                 | 34,143 |

S4.11XY-8H×4H×96B-channel crystal sequences

|                                                  |        |
|--------------------------------------------------|--------|
| CCAGGTAAAGTGGCTCAATCATACTCACGGTT                 | 1,23   |
| AACTGTTGTGTCCTATGTTTACTTAGGGATGG                 | 1,39   |
| TACGAACTCAACGCACGCTCGGGTAGTCTCAA                 | 1,55   |
| GAAGATAGAGACATAAATTCGCTAAAACCGGA                 | 1,71   |
| AAAGTATCCGCATCTCACTCAGTGATCGAGTATTCATGTCGCCTTTTC | 1,87   |
| GAACGGTGACACACTTGTGTTTCATTAGAGTA                 | 1,103  |
| GCGGAAATATGGCCGCTTCGGTGCGCAGCGGG                 | 3,23   |
| CCGCCTGTAACGCTTAATCAGCCCGGGCTTTT                 | 3,39   |
| GCTAATACGCTGAGCGATGCTGTTGTTGCGGG                 | 3,55   |
| GTTTCTGAACCGGAACCCGGGCTAATGAAGCC                 | 3,71   |
| GTGACCCAGAGACTGTCTGATGCACCCGGGAGCCAGCCACTTAGCTGT | 3,103  |
| GTCAGTGTGATCGCGAGTTCCTCTAGCTAGG                  | 5,23   |
| GTGATGCCAAAAGGGTGGATATGGAGCTGGAA                 | 5,39   |
| CGGCTCTGATTTCTAGTGACCTGGTATAATGG                 | 5,55   |
| CGGAGCTACCTGACCTCAATCATACTGCCAC                  | 5,71   |
| GGAAGGATTCATCCCTTTAAGAATGATCGCA                  | 7,23   |
| CAGTCTTTGAGATGTTGAACATCTTTTGGTTG                 | 7,39   |
| GCGTAAAGATCTCGCATTCTGGTGCCAAAAC                  | 7,55   |
| GCCGACTCGTTCAAGCACTATTATCTGGCTAT                 | 7,71   |
| AAAAGATGTCTGTACGCCAAGCTTAGCATAA                  | 9,23   |
| GCGGCTGGACGACCCCGCGTGCGACGACTGA                  | 9,39   |
| CCGTCGAGCCCTGCGCGACAAAACGCATATCCT                | 9,55   |
| CGGCCCGCCAAATTAATAGTCGATTACGCTTC                 | 9,71   |
| GCCTAAAGGTCCTCCACGGTAATCGGGGGTG                  | 11,23  |
| ACTCCGGCTCCTTGGTATATTAGCTTACCCA                  | 11,39  |
| CTCGCGTGGCACGTCTACGACTCGTCAACGA                  | 11,55  |
| GGACTGTTCTACATAGTGACTTGGACGAGGTT                 | 11,71  |
| TCACTGGGCGCTATACAGGAACTCGAGGGGC                  | 13,23  |
| TCCCTGTCTGTGAGCCAGCGACCACTTCTG                   | 13,39  |
| GAGAAAGATGCGGTGGCAGTAGTTGTGATTAG                 | 13,55  |
| CTTGGGGTGATATACCTCACTAAACTCCTTCTAATGTGACTAAGCGT  | 13,71  |
| TAACCTCAAAGGAAACCAGCTATCCCATATTC                 | 13,87  |
| GATGTAAGCGGACATCTATGCGCCGATATCC                  | 13,103 |
| GTTCAAACCTAGGGGGCTTCTGACCAAAGCTCA                | 15,23  |
| TGAGAATTGTAAACAGGAACAGCTTAGAGCAG                 | 15,39  |
| TCAAGTTCGGATACGCTACCTATGGACGGGGA                 | 15,55  |
| TATGCGACACCATGATCCGGATGAGTTATGAAGATCGTCATTGGGATA | 15,87  |
| TACAATCTCGAAGTAAAGCATAGCACCTGCG                  | 15,103 |
| AAGATAGGGTACAGCAGTAATACCTCTACCT                  | 17,23  |
| TGTTGGACGTAAGCGTGAATAACGACCAGAA                  | 17,39  |
| AGCACGAGGATTATCACGTGTACCTCGAAATA                 | 17,55  |
| ATCGTTAGTTTCTCGACTGTTCCGAAACAGGC                 | 17,71  |
| AGCGGTAGCCTCCACTTAACCTATGCCTTGGTAACTGATTTTCTCCT  | 17,87  |
| GGTTCCGCTAGCTGATCTATGGTCCTTAATAT                 | 17,103 |
| AACCTCGGAGGCAAGGGGAGAGGGTGAACA                   | 19,23  |
| GGCCACCTGGCTCGGGGAGTGCCCTCGGCA                   | 19,39  |
| GCCGCTCGGTTATACTCGTCAAGCCTGCTTT                  | 19,55  |
| CCATAGCTAACCCGATTGTGCATTCCACGTGA                 | 19,71  |
| GTCGTACTTAAAGCAAACGTGGGAGTGCCCGAGCGTCTGAGGTATGGT | 19,103 |
| TTACCCACTATGTTGTCTCAAGTGCTAACAGT                 | 21,23  |
| ACTAATTATCCATAACTGTGCACGTCAGGGAT                 | 21,39  |
| TCTCACCGGTGGCCGTGCTACATCAGTTTCT                  | 21,55  |
| TTGCACTCCTGGGGAACTATACTTACGCACT                  | 21,71  |
| GGTTTGGAGGGATTAGGCAATTGCTAGGTTGC                 | 23,23  |
| ATTGTAGGCACAATTTTTGATTCGATCACATA                 | 23,39  |
| CATGGGCAATAAAGCTGTAGCCTGAGGCGCGC                 | 23,55  |
| AGCTGACCCGTGTCACCTTGATATTGAGGGAC                 | 23,71  |
| ACCTCGTCAATTCGGATAAACCATACTGAGGGC                | 25,23  |
| AGTGGGCGAGATCGGCTAATCATTAGTGCTCC                 | 25,39  |
| CCTAGTTAGTTCATAGTTCATTAGGGGCGGAA                 | 25,55  |
| ATGGGCTGGTGCCCCACGTACAGTAAACCAACC                | 25,71  |
| GGTGTAACCTGTGGGTAGGGCCGAGCGCTGGGC                | 27,23  |
| TTACATGTGCAAGTGAAATATATGACTTGGTC                 | 27,39  |
| GACCAGATCTGCTAGAAACCACCAACATCCTC                 | 27,55  |
| CCTGACACCTTTCAATTTTATAGTAAACACCCA                | 27,71  |
| ACAGAGCTGAACTTCCCATGGTCGTTCTACTG                 | 29,23  |



|                                                   |        |
|---------------------------------------------------|--------|
| TCGTATGATCATAGGATCAAATAAATACAGC                   | 29,39  |
| GTACCGCCAGTTCCTTGTCTTATTGGCGATCG                  | 29,55  |
| TGCATTCCAATGTTTGTATGGCCGCGTGGCTTATTAAGACGGCCGGTGT | 29,71  |
| AACCACATAAAGTCGTCCGCCCTCCGGTAGTCA                 | 29,87  |
| ACGCGGAACGTAATGGCAGAAAGTCTATACCC                  | 29,103 |
| GACAAAAACAGATTTGTACCGGGGTGAACAGC                  | 31,23  |
| ACGTGCGGCTTCTCCTGTATCGCCTTGTGTAT                  | 31,39  |
| TATACTCTTGCAGGGGGTTCGAGCGCTCCACT                  | 31,55  |
| GTAGTGGCCGGCCATCGTGGACTAGAAAGCGCCGGCAATCTGAATATC  | 31,87  |
| GCTACCTCCGATACGCGAACCAGAACCATTTA                  | 31,103 |
| GTATGATTTTTTTTTTCAAATCTG                          | 0,15   |
| AGATGTTCAACCGTGAAGTTGAACCTGTTTAC                  | 0,31   |
| ACCCGAGCCAACCAAACCGCACGTCCCCGCA                   | 0,47   |
| ATAATAGTTTGAGACTGAACTTGATTCAATAAC                 | 0,63   |
| CACTGAGTATAGCCAGTAGTCCACGATGGCCG                  | 0,79   |
| GACATGAATACTCGATGTCGCATATTACTTCG                  | 0,95   |
| TTTTGAAAAGGCGAGGTAGCTTTT                          | 0,107  |
| GCACCGAATTTTTTTTTGGAAGTTC                         | 2,15   |
| AAGTAAACCCCGCTGCCCCAGTGAGCTCGACA                  | 2,31   |
| AACAGCATCCATCCCTTCATACGACAAGAAGT                  | 2,47   |
| AGCGAATTCGCAACTCTTTCTCGTATATCA                    | 2,63   |
| GTGGCTGGTCCGGTTTGAATGCAACGACTTT                   | 2,79   |
| ATGAACACACAGCTAATGGAGTTAGATGTCCG                  | 2,95   |
| TTTTTACTCTGATTCCGCGTTTTT                          | 2,107  |
| GAGGGAATTTTTTTTACCACA                             | 4,15   |
| GGGCTGATCCTAGCTACTTTAGGCCCAAGGAG                  | 4,31   |
| CCAGGTCAAAAAGCCACATGTAATCTAGCAG                   | 4,47   |
| TAGCCCGCCATTATACACGCGAGCTATGTAG                   | 4,63   |
| TTTTTTTTGGCTTCATGTGCAAGTTTTTTTT                   | 4,79   |
| TTCTTAAATTTTTTTATCCGAAT                           | 6,15   |
| CCATATCCTGCGATCACATCTTTTGGGGTCTG                  | 6,31   |
| CACCAGAATTCCAGCTCGCCCACTCTATGAAC                  | 6,47   |
| TATGATTGAGTTTTGGCTCGACGGTTAATTTG                  | 6,63   |
| TTTTTTTTGTGGGACGCAGCCATTTTTTTTT                   | 6,79   |
| GGTCAGAATTTTTTTTGGGGATGA                          | 8,15   |
| CGCACGGCTGAGCTTTTCCAAACCAAATTGTG                  | 8,31   |
| CATAGGTATCAGTCGTAAGACTGTGCGAGAT                   | 8,47   |
| ATCGACTATCCCGTCTGCCCATGGTGACACG                   | 8,63   |
| TTTTTTTTGAAGCGTAGAGTCGGCTTTTTTTT                  | 8,79   |
| AGCTTGGGTTTTTTTTTCGCGATC                          | 10,15  |
| CTAATATATTATGCTAGTGGGTAAGTTATGGA                  | 10,31  |
| CGTTTGTCTGGGTAAGGGCATCACCTAGAAAT                  | 10,47  |
| CCAAGTCAAGGATATGCGGTGAGATTCCCCAG                  | 10,63  |
| TTTTTTTTAACTCGTTAGCTCCGTTTTTTTT                   | 10,79  |
| ATTACCGTTTTTTTTTGGCGCCAT                          | 12,15  |
| GTCGCTGGCACCCCCGCGAGGGTTCCCGAGCC                  | 12,31  |
| CGAGTCGTCAGAAGTGACAGGCGGCGCTCAGC                  | 12,47  |
| TTAGTGAGTCGTTTCGAGAGGCGGCATCGGGT                  | 12,63  |
| TCACATTAGAAGGAGTTCAGAAACCTCCCGGT                  | 12,79  |
| GGCGCATAACGCTTAGTCCCACGTTTGCTTTA                  | 12,95  |
| TTTTGGATATCGGGGTCACTTTT                           | 12,107 |
| AGTTTCCTTTTTTTTTGAGCCACT                          | 14,15  |
| AGCTGTTGCCCCCTCGCCTATCTTACGCTTAC                  | 14,31  |
| AACTACTGCTGCTTACAACAGTTGTGCGTTG                   | 14,47  |
| TGACGATCCTAATCACCTCGTCTCGAGAAA                    | 14,63  |
| GATAGCTGTATCCCAACTATCTTCGAGATGCG                  | 14,79  |
| GCTATGCTGAATATGGCTACCGCTATCAGCTA                  | 14,95  |
| TTTTCGCAGGGTACCGTTCTTTT                           | 14,107 |
| GTATTAATTTTTTTTTGCCCCCTA                          | 16,15  |
| CGAATCAAAGGTAGAGTTTTTGTAGGAGAAG                   | 16,31  |
| GGTACACGATGTGATAATTCTCAGCGTATCC                   | 16,47  |
| ATATCAAGTATTTTCAAGAGTATAGCGTTTC                   | 16,63  |
| TAGGTAAAGTCCCTCATCATCCGGATCATGGT                  | 16,79  |
| ATCAGTTACCAAGGCAGCCACTACGCGTATCG                  | 16,95  |
| TTTTAGGAGAAAAGATTGTATTTT                          | 16,107 |
| CCTCTCCCTTTTTTTTGTATAGCG                          | 18,15  |
| GTTATTTCTGTTTACAGCTCTGTTCTTATGA                   | 18,31  |
| CTTGACGATTCTGGTGCACAGGGACCACCGCA                  | 18,47  |

|                                    |        |
|------------------------------------|--------|
| CGGAACAGAAAGCAGGGGCGGTACCAAACATT   | 18,63  |
| TCAGACGCGCCTGTTTCCCCAAGGTTTCCTT    | 18,79  |
| GACCATAGACCATACCATGTGGTTCCATTACG   | 18,95  |
| TTTTATATTAAGCTTACATCTTTT           | 18,107 |
| CACTTGAGTTTTTTTTTGGGAAGGAC         | 20,15  |
| GGGCACTCACTGTTAGGGTACACCTCACTTGC   | 20,31  |
| ATGTAGCATGCCGAGGGCCGGAGTAGACGTGC   | 20,47  |
| AATGCACAAGAAACTGATCTGGTCATTGAAAG   | 20,63  |
| TTTTTTTTTACAGTGGAACAGTCCTTTTTTTTT  | 20,79  |
| GCAATTGCTTTTTTTTTCTGACAGA          | 22,15  |
| CGTGACAGCAACCTAGACGAGGTGCCGATCT    | 22,31  |
| CAGGCTACATCCCTGACCAGCCGCGCAGGG     | 22,47  |
| AGTATAAGTGCGCGCCTTAACCTAAGTGGGGCAC | 22,63  |
| TTTTTTTTTAGTGCGTAGCGGGCCGTTTTTTTTT | 22,79  |
| CCCCGTATTTTTTTTCTAATCCC            | 24,15  |
| AATGATTAGCTGTTCAATCCTTCCAACATCTC   | 24,31  |
| GCTCGACCGGAGCACTCCTACAATAGCTTTAT   | 24,47  |
| ACTGTACGAGTGGAGCCTTTACGCGCTTGAAC   | 24,63  |
| TTTTTTTTTGGTTGGTTGTGCAGCTTTTTTTTTT | 24,79  |
| TATGGTTTTTTTTTTACAACATA            | 26,15  |
| CATATATTGCCCTCAGACACTGACACCCTTTT   | 26,31  |
| CTAATGAAGACCAAGTTAATTAGTACGGCCAC   | 26,47  |
| TACTAAAATTCCGCCCCAGAGCCGAGGTCAGG   | 26,63  |
| TTTTTTTTTGGGTGTTGAGTGCAATTTTTTTTT  | 26,79  |
| CTCGGCCCTTTTTTTCTTGCCCTC           | 28,15  |
| TAGTTTGAGCCCAGCGATTTCCGCTAAGCGTT   | 28,31  |
| TGGTGGTTGCTGTATTAGGTGGCCGTATAACC   | 28,47  |
| GCGGCCATGAGGATGTGTATTAGCGTTCCGGT   | 28,63  |
| CGTCTTAATAAGCCACAGCTATGGTCGGGCAC   | 28,79  |
| ACTTCTGACACCGGCGCATCAGACAGTCTCT    | 28,95  |
| TTTTGGGTATAGAGTACGACTTTT           | 28,107 |
| CGACCATGTTTTTTTTTGCTGTGAC          | 30,15  |
| GGCGATACCAGTAGAATAACCTGGATAGGACA   | 30,31  |
| AATAAGGAATACACAAGTCCAACATGATAATC   | 30,47  |
| GATTGCCGCGATCGCCAGTTCGTATATGCTCT   | 30,63  |
| GGAGGCGGGATATCACTAACGATGTGGGAGG    | 30,79  |
| TCTGGTTCTGACTACCGATACTTTAAGTGTGT   | 30,95  |
| TTTTTAAATGGTGCGGAACCTTTT           | 30,107 |

## S5.1 Offset-ZX-6H×6H×64B-cuboid crystal sequence

|                                                   |       |
|---------------------------------------------------|-------|
| CCAGGTTAAGTGGCTCAATCATACTCACGGTAACTGTTGTGTCCTAT   | 1,23  |
| GTTTACTTAGGGATGGTACGAACTCAACGCAC                  | 1,39  |
| GCTCGGTTAGTCTCAAGAAGATAGAGAGCATA                  | 1,55  |
| AATTCGCTAAACCGGAAAAAGTATCCGCATCTC                 | 1,71  |
| ACTCAGTGATCGAGTATTCATGTCGCCTTTTC                  | 3,23  |
| GAACGGTGACACACTTGTGTTTCATTCAGAGTA                 | 3,39  |
| GCGGAAATATGGCCGCTTCGGTGCAGCGGG                    | 3,55  |
| CCGCCTGTAACGCTTAATCAGCCCGGGCTTTT                  | 3,71  |
| GCTAATACGCTGAGCGATGCTGTTGTTGCGGG                  | 5,23  |
| GTTTCTGAACCGGAACCCGGGCTAATGAAGCC                  | 5,39  |
| GTGACCCAGAGACTGCTGATGCACCGGGAGCCAGCCACTTAGCTGT    | 5,71  |
| GTCAGTGTGATCGCGAGTTCCTCTAGCTAGG                   | 7,23  |
| GTGATGCCAAAAGGGTGGATATGGAGCTGGAACGGCTCTGATTTCTAG  | 7,39  |
| TGACCTGGTATAATGGCGGAGCTACCTGACCT                  | 7,55  |
| CAATCATACTGCCACGGAAGGATTCATCCCC                   | 9,23  |
| TTTAAAGAAATGATCGCACAGTCTTTGAGATGTT                | 9,39  |
| GAACATCTTTTGGTTGGCGTAAAGATCTCGCA                  | 9,55  |
| TTCTGGTGCCAAAACCTGCCGACTCGTTCAAGC                 | 9,71  |
| ACTATTATCTGGCTATAAAAAGATGTCTGTCAGCCCAAGCTTAGCATAA | 11,23 |
| GCGGCTGGACGACCCCGCGTGCAGCAGCTGA                   | 11,39 |
| CCGTCGAGCCCTGCGCGCAAAACGCATATCCT                  | 11,55 |
| CGGCCGCAAATAATAGTCGATTACGCTTC                     | 11,71 |
| GCCTAAAAGTCTTCCACGGTAATCGGGGGTACTCCGGCCTCCTTGG    | 13,23 |
| TATATTAGCTTACCCACTCGCGTGGCACGTCT                  | 13,39 |
| ACGACTCGTCAACGAGGACTGTTCTACATAG                   | 13,55 |
| TGACTTGGACGAGGTTTCACTGGGCGTATAC                   | 13,71 |
| AGGAAACTCGAGGGGCTCCCTGTCTGTGAGC                   | 15,23 |
| CCAGCGACCACTTCTGGAGAAAAGATGCGGTGG                 | 15,39 |
| CAGTAGTTGTGATTAGCTTGGGGGTGATATAC                  | 15,55 |
| CTCACTAAACTCCTTCTAATGTGACTAAGCGT                  | 15,71 |
| TAACTCAAAGGAAACCAGCTATCCCATATTC                   | 17,23 |
| GATGTAAGCGGACATCTATGCCCCGATATCC                   | 17,39 |
| GTTCAAACCTAGGGGGCTTCTGACCAAAGCTCATGAGAATTGTAAACAG | 17,71 |
| GAACAGCTTAGAGCAGTCAAGTTCGGATACGC                  | 19,23 |
| TACCTATGGACGGGATATGCGACACCATGATCCGGATGAGTTATGAA   | 19,39 |
| GATCGTCATTGGGATATAACAATCTCGAAGTAA                 | 19,55 |
| AGCATAGCACCTTGGCAAGATAGGGTCACAGC                  | 21,23 |
| AGTAATACCTCTACCTTGTGGACGTAAGCGT                   | 21,39 |
| GAAATAACGACCAGAAAGCAGGAGGATTATCA                  | 21,55 |
| CGTGTACCTCGAAATAATCGTTAGTTTCTCGA                  | 21,71 |
| CTGTTCCGAAACAGGCAGCGGTAGCCTCCCACTTAACTATGCCTTGG   | 23,23 |
| TAACTGATTTTCTCCTGGTTCCGCTAGCTGAT                  | 23,39 |
| CTATGGTCTTAATATAACCCTCGGAGGCAAG                   | 23,55 |
| GGGAGAGGGTGAACAGGCCACCTGGCTCGGG                   | 23,71 |
| GAGTGCCCTCGGCAGCCGCTCGGTTATACTCGTCAAGCCTGCTTT     | 25,23 |
| CCATAGCTAACCAGATTGTGCATTCCACGTGA                  | 25,39 |
| GTCGTACTTAAAGCAAACGTGGGAGTGCCCGA                  | 25,55 |
| GCGTCTGAGGTATGGTTACCCACTATGTTGT                   | 25,71 |
| CTCAAGTGCTAACAGTACTAATTATCCATAAC                  | 27,23 |
| TGTGCAGTCAAGGATTCTCACCGTGGCCGT                    | 27,39 |
| TGCTACATCAGTTTCTTTGCACTCCTGGGGAA                  | 27,55 |
| ACTATACTTACGCACTGGTTTGGAGGGATTAG                  | 27,71 |
| GCAATTGCTAGGTTGCATTGTAGGCACAATTT                  | 29,23 |
| TTGATTCGATCACATACATGGGCAATAAAGCT                  | 29,39 |
| GTAGCCTGAGGCGCGCAGCTGCACCGTGTACCTTGATATTGAGGGAC   | 29,71 |
| ACCTCGTCAATTCGGATAAACCATACTGAGGGC                 | 31,23 |
| AGTGGGCGAGATCGGCTAATCATTAGTCTCCCTTAGTTAGTTCATAG   | 31,39 |
| TTCATTAGGGGGCGAAATGGGCTGGTGCCCA                   | 31,55 |
| CGTACAGTAACCAACCGGTGTACCTGTGGGTA                  | 33,23 |
| GGGCCGAGCGCTGGGCTTACATGTGCAAGTGA                  | 33,39 |
| AATATATGACTTGGTCCGACCAGATCTGCTAGA                 | 33,55 |
| AACCACCAACATCCTCCTTGACACCTTTCAAT                  | 33,71 |
| TTTATGATAAACCCAAACAGAGCTGAACCTCCCATGGTCGTTCTACTG  | 35,23 |
| TCGTATGATCATAGGATCAAATAAATACAGC                   | 35,39 |
| GTACCGCCAGTTCTGTCCCTATTGGCGATCG                   | 35,55 |
| TGCATTCCAATGTTTGTGATGGCCGCTGGCTTA                 | 35,71 |

|                                                    |       |
|----------------------------------------------------|-------|
| GTATGATTAAGCCCGGGCTGATACAGCTAACAGGTCAGTACAGACA     | 0,15  |
| CTATCTTCATAGGACACAACAGTTAACCGTGAATAATAGTGGGGTCGT   | 0,47  |
| TTTTTTTTGGCTTCATTAGCCCGTATGCTCTCTCGACGGTAAATTTG    | 0,79  |
| GACATGAATTTTTTTT                                   | 2,15  |
| GCACCGAAGTGCCTGAGTTCGTAGAAAAGGCTATGATTGTGCGATCA    | 2,47  |
| TTTTTTTTGAGATGCGGATACTTTCCCGCTGCAGATGTTAGTTTTGG    | 2,79  |
| AACAGCATTTTTTTTTT                                  | 4,15  |
| GTGGCTGGTACTCTGAATGAACACCCCGCAACACACTGACACCCTTTT   | 4,47  |
| CGTTTGTCTTTTTTTTTTTTTTTTCGCTCAGCGIATTAGCGTTCCGGT   | 6,15  |
| CCATATCCAGGATATGTGGAGTTAGATGTCCG                   | 6,31  |
| CAGAGCCGTTCCAGCTTCAGAAAACCTCCCGGTGCATCAGACAGTCTCT  | 6,47  |
| AGCTTGGGCTAGAAAATGGTCAGAAAGCCCTA                   | 6,63  |
| GAGGGAACTTTTTTTTTTTTTTTTTTACTCGATCACTGAGTAAAGTGTGT | 8,15  |
| AAAGACTGCCTAGCTAAGTTTCCCTCAGAAAGTG                 | 8,31  |
| TAGTCCGAACATCTCCACCGTTCGCGGCCATATTTCCGCTAAGCGTT    | 8,47  |
| GAGTCGGCAGGTCAGGAACTACTGGAAGGAGT                   | 8,63  |
| TTTTTTTTGCTTGAACACAGGCGTTTTTTTTT                   | 8,79  |
| ATCCTTCCCTATGCTAGGGGTCACGAGCCACTAACCTGGCCATCCCT    | 10,15 |
| CGCACGGCGGGGATGACTTTAGGCTGGGTAAG                   | 10,31 |
| CTTTACGCTCAGTCGTAAGTAAACTTGAGACTACCCGAGCTCCGGTTT   | 10,47 |
| ATCGACTATGCGAGATCGAGTCGTAACCTCGT                   | 10,63 |
| TTTTTTTTGAAGCGTAAGCGAATTTTTTTTTT                   | 10,79 |
| ATTACCGTACGCTTAGCATCTTTTATAGCCAG                   | 12,15 |
| GCCGGAGTACCCCCGCGAACAGAGGAGAAA                     | 12,31 |
| AACAGTCCCAAGGAGCCAGCCGCGCGCAGGG                    | 12,47 |
| GGCGCATACTATGTAGGACCATAGTGTTCAC                    | 12,63 |
| TTTTTTTTGGAAATCGCGGGCCGTTTTTTTTT                   | 12,79 |
| GACAGGGATTTTTTTTTTTTTTTTGTGGGACG                   | 14,15 |
| CACGCGAGGCTCGACAGCTATGCTAGGTAGAG                   | 14,31 |
| CCCCAAGAGACGTGCTTCTTAAACAACCAAAA                   | 14,47 |
| CCCAGTGAGTATATCAGTTATTTCTATTTTCA                   | 14,63 |
| TTTTTTTTGTATAGCGCACCAAGAATTTTTTTT                  | 14,79 |
| GATAGCTGTTTTTTTTTTTTTTTTTTCGCGATC                  | 16,15 |
| TCTTCTCGAATATGGAGCTGTTCTCCCGTC                     | 16,31 |
| AATTCTCACCACCGCAGGCATCACCCATTATA                   | 16,47 |
| TCACATTACTGTTACTGACGATCGTGGGAGG                    | 16,63 |
| CGAGGGTTTTTTTTTTTTTTTTTTGTTTCCCT                   | 18,15 |
| GTCCGATACTTGCTCGCAATTGCTATGTGAT                    | 18,31 |
| TCATCCGGATCATGGTCTTACATCTGAGCTTT                   | 18,47 |
| TAGGTTAATTCATAACGTGCAGCTGCGCGCCT                   | 18,63 |
| GAACCTGATTTTTTTTTTTTTTTTGCCCTCG                    | 20,15 |
| GTCCAACAGCGTATCCCACTTGAGATCCCTGA                   | 20,31 |
| AGATTGTAACGCTTACGTCGCTGGCTAATCAC                   | 20,47 |
| CTAACGATTTACTTCGATGTAGCAAGTGCGTA                   | 20,63 |
| TTTTTTTTTCGAGAAAATTAGTGAATTTTTTTT                  | 20,79 |
| CCTATCTTCCAAGGCAGTTTGAACGGAAGGAC                   | 22,15 |
| GCGGAACCGCTGTGACGGGCACTCATCGGGTT                   | 22,31 |
| CTCGTGCTATCAGCTACTAATATATCGTTTCA                   | 22,47 |
| AGGTGGCCTGATAATCAGTACGACACCATACC                   | 22,63 |
| TTTTTTTTCCCGAGCCCCAAGTCATTTTTTTT                   | 22,79 |
| GAGGCGGCCTAATCCCTACCGCTGCTGTTT                     | 24,15 |
| CTTGACGAGTATAACCTACTAAAATCCTATGATCATAACGACAAGAACT  | 24,31 |
| TCCCACGTAAAGCAGGATCAGTTAATATTAAG                   | 24,47 |
| TGCCCCATGTCGGGCACGGCGGTACCAAAACATTGGAATGCATTTTTTTT | 24,63 |
| TTTTTTTTAGCTTTATCCTCTCCCTTTTTTTT                   | 24,79 |
| TAATTAGTTTTTTTTTTTTTTTTTTCGCAGGGT                  | 26,15 |
| AATGCACAGTTATGGAAGTGTACGGCCAGCGCTCGGCCGACCAAGT     | 26,31 |
| GAGTGC AATCAGTGGGTATTACTTTCTGGTC                   | 26,47 |
| GTGGGTAATTTCCAGCATATATTGAGGATGTTGGTGGTTTTTTTTTT    | 26,63 |
| TTTTTTTTTACAACATAGGTACACGTTTTTTTTT                 | 26,79 |
| CCTACAATTTTTTTTTTTTTTTTTTCTGCTCIA                  | 28,15 |
| CGGTGAGAAAATTGTGGACGAGGTGCCGATCTCGCCCACTTTCCGCC    | 28,31 |
| ATATCAAGACGGCCACCATAGGTATATCCCAA                   | 28,47 |
| TCCAAACCGTCCCTACTAATGAAGGAAGTTCAGCTCTGTTGGGTGTT    | 28,63 |
| AATGATTACGATCGCCAATAAGGATTTTTTTTTTTTTTTGCAACCTA    | 30,31 |
| CGACCATGCTATGAACTAACTAAGGGAGCACTCGAATCAAGTGACACG   | 30,63 |
| TTTTTTTTATCCGAAT                                   | 31,0  |
| ACATGTAAGCCCTCAGTATGGTTTTTTTTTTTTTTTTTTTACTGTTAG   | 32,31 |

|                                                  |       |
|--------------------------------------------------|-------|
| GTGTCAAGTGGGGCACCAGCCATTCACTTGCCGTGCACAAGAACTG   | 32,63 |
| TTTTTTTTATTGAAAGAGTATAGTTTTTTTTT                 | 32,79 |
| TTTTTTTTGGTTGGTT                                 | 33,0  |
| TAGTTTGATACCCACAGGTACACCCAGTAGAACAGGCTACTGCCGAGG | 34,31 |
| GCGGCCATTCTAGCAGATCTGGTCGCTGTATTAGCTATGGTTGCTTTA | 34,63 |
| TTTTTTTTAAGCCACTCAGACGCTTTTTTTT                  | 34,79 |
